# Supplementary material
Source: publisher site journal article supplement (https://www.spandidos-publications.com/6453/downloadSupplementary)
Supplement: Supplementary file 1 [file downloadSupplementary]

**Table S1.** Differentially altered proteins identified in ARID1A-overexpressing and empty vector control SW48 cells.

| No. | Protein accession number | Gene Names | Protein name                                          | Peptide sequences         | Intensity (mean $\pm$ standard deviation) |                   | P-value (unpaired t-test) | Log <sub>2</sub> (fold change) <sup>a</sup> |
|-----|--------------------------|------------|-------------------------------------------------------|---------------------------|-------------------------------------------|-------------------|---------------------------|---------------------------------------------|
|     |                          |            |                                                       |                           | Empty vector                              | ARID1A            |                           |                                             |
| 1   | Q96H35                   | RBM18      | Probable RNA-binding protein 18                       | LALSKKLVVR                | 0.000 $\pm$ 0.00                          | 15.862 $\pm$ 3.04 | 8.27923 $\times 10^{-4}$  | 13.93                                       |
| 2   | Q4ZIN3                   | TMEM259    | Membralin                                             | DQCFGDR                   | 0.000 $\pm$ 0.00                          | 13.762 $\pm$ 1.14 | 3.14598 $\times 10^{-5}$  | 13.74                                       |
| 3   | Q6ZT07                   | TBC1D9     | TBC1 domain family member 9                           | ISDFLQQTTSK               | 0.000 $\pm$ 0.00                          | 13.599 $\pm$ 1.95 | 2.67227 $\times 10^{-4}$  | 13.72                                       |
| 4   | P08631                   | HCK        | Tyrosine-protein kinase HCK                           | DYDPRQGDTVK               | 0.000 $\pm$ 0.00                          | 13.714 $\pm$ 3.46 | 2.36198 $\times 10^{-3}$  | 13.71                                       |
| 5   | Q9H706                   | GAREM1     | GRB2 associated and regulator of MAPK protein 1       | DIKEPVQYFNSVE<br>EVAK     | 0.000 $\pm$ 0.00                          | 13.411 $\pm$ 0.16 | 1.43958 $\times 10^{-8}$  | 13.71                                       |
| 6   | Q16515                   | ASIC2      | Acid-sensing ion channel 2                            | DMMLYCKFK                 | 0.000 $\pm$ 0.00                          | 13.161 $\pm$ 0.17 | 1.72986 $\times 10^{-8}$  | 13.68                                       |
| 7   | Q13470                   | TNK1       | Non-receptor tyrosine-protein kinase TNK1             | EVSVMNLEHPH<br>VLR        | 0.000 $\pm$ 0.00                          | 13.264 $\pm$ 2.13 | 4.19574 $\times 10^{-4}$  | 13.68                                       |
| 8   | Q8NFD5                   | ARID1B     | AT-rich interactive domain-containing protein 1B      | CICVSNIVR                 | 0.000 $\pm$ 0.00                          | 13.255 $\pm$ 2.27 | 5.39093 $\times 10^{-4}$  | 13.68                                       |
| 9   | Q96K21                   | ZFYVE19    | Abscission/NoCut checkpoint regulator                 | EENTRQER                  | 0.000 $\pm$ 0.00                          | 13.240 $\pm$ 2.26 | 5.27156 $\times 10^{-4}$  | 13.68                                       |
| 10  | Q7Z794                   | KRT77      | Keratin, type II cytoskeletal 1b                      | FASFIDK                   | 0.000 $\pm$ 0.00                          | 13.052 $\pm$ 1.23 | 5.12024 $\times 10^{-5}$  | 13.67                                       |
| 11  | Q13231                   | CHIT1      | Chitotriosidase-1                                     | TLLAIGGWNFGT<br>QK        | 0.000 $\pm$ 0.00                          | 12.934 $\pm$ 0.40 | 6.246 $\times 10^{-7}$    | 13.66                                       |
| 12  | Q9Y2T3                   | GDA        | Guanine deaminase                                     | FVSEMLQK                  | 0.000 $\pm$ 0.00                          | 12.899 $\pm$ 0.64 | 4.09322 $\times 10^{-6}$  | 13.65                                       |
| 13  | Q9NRD1                   | FBXO6      | F-box only protein 6                                  | DLIDLMTLWK                | 0.000 $\pm$ 0.00                          | 12.897 $\pm$ 0.99 | 2.32037 $\times 10^{-5}$  | 13.65                                       |
| 14  | P40189                   | IL6ST      | Interleukin-6 receptor subunit beta                   | NLSCIVNEGK                | 0.000 $\pm$ 0.00                          | 12.961 $\pm$ 2.00 | 3.60053 $\times 10^{-4}$  | 13.65                                       |
| 15  | Q9BXI3                   | NT5C1A     | Cytosolic 5'-nucleotidase 1A                          | ALEAVNRRRLR               | 0.000 $\pm$ 0.00                          | 12.889 $\pm$ 1.38 | 8.49063 $\times 10^{-5}$  | 13.65                                       |
| 16  | Q9NQ69                   | LHX9       | LIM/homeobox protein Lhx9                             | DSLVCYCR                  | 0.000 $\pm$ 0.00                          | 12.764 $\pm$ 0.98 | 2.29092 $\times 10^{-5}$  | 13.64                                       |
| 17  | Q9Y5I2                   | PCDHA10    | Protocadherin alpha-10                                | DINDNPPRFSVTE<br>QK       | 0.000 $\pm$ 0.00                          | 12.730 $\pm$ 0.40 | 6.27543 $\times 10^{-7}$  | 13.64                                       |
| 18  | Q8NEM1                   | ZNF680     | Zinc finger protein 680                               | AFNQFANLTR                | 0.000 $\pm$ 0.00                          | 12.727 $\pm$ 1.23 | 5.75698 $\times 10^{-5}$  | 13.63                                       |
| 19  | P08729                   | KRT7       | Keratin, type II cytoskeletal 7                       | AIQRLQAEIDNIK<br>NQR      | 0.000 $\pm$ 0.00                          | 12.663 $\pm$ 0.80 | 1.05265 $\times 10^{-5}$  | 13.63                                       |
| 20  | Q86V71                   | ZNF429     | Zinc finger protein 429                               | AFNWSSTLTQKHK             | 0.000 $\pm$ 0.00                          | 12.598 $\pm$ 0.02 | 2.94119 $\times 10^{-12}$ | 13.62                                       |
| 21  | Q13395                   | TARBP1     | Probable methyltransferase TARBP1                     | AAGAALR                   | 0.000 $\pm$ 0.00                          | 12.533 $\pm$ 0.29 | 2.00669 $\times 10^{-7}$  | 13.61                                       |
| 22  | Q86Y25                   | ZNF354C    | Zinc finger protein 354C                              | AFNQYSSFNEHR              | 0.000 $\pm$ 0.00                          | 12.515 $\pm$ 0.99 | 2.54046 $\times 10^{-5}$  | 13.61                                       |
| 23  | Q9UJ41                   | RABGEF1    | Rab5 GDP/GTP exchange factor                          | LMTGEDGYFTN<br>LCCAVAFIEK | 0.000 $\pm$ 0.00                          | 12.597 $\pm$ 1.99 | 3.92433 $\times 10^{-4}$  | 13.61                                       |
| 24  | Q8IYN0                   | ZNF100     | Zinc finger protein 100                               | FYKCEECGK                 | 0.000 $\pm$ 0.00                          | 12.475 $\pm$ 0.44 | 1.0284 $\times 10^{-6}$   | 13.61                                       |
| 25  | O75027                   | ABCB7      | Iron-sulfur clusters transporter ABCB7, mitochondrial | ENISKEEER                 | 0.000 $\pm$ 0.00                          | 12.453 $\pm$ 0.36 | 4.82419 $\times 10^{-7}$  | 13.60                                       |

|    |        |          |                                                             |                            |            |             |                           |       |
|----|--------|----------|-------------------------------------------------------------|----------------------------|------------|-------------|---------------------------|-------|
| 26 | Q9P1A6 | DLGAP2   | Disks large-associated protein 2                            | AASFRQNSASER               | 0.000±0.00 | 12.419±0.68 | 6.11971 x10 <sup>-6</sup> | 13.60 |
| 27 | Q8TC56 | GARIN3   | Golgi-associated RAB2 interactor protein 3                  | NQKASSHRASAG<br>HK         | 0.000±0.00 | 12.392±0.77 | 1.01073 x10 <sup>-5</sup> | 13.60 |
| 28 | P51812 | RPS6KA3  | Ribosomal protein S6 kinase alpha-3                         | ADPSQFELLK                 | 0.000±0.00 | 12.477±1.94 | 3.67926 x10 <sup>-4</sup> | 13.59 |
| 29 | P36955 | SERPINF1 | Pigment epithelium-derived factor                           | LAAAVSNFGYDL<br>YR         | 0.000±0.00 | 12.409±1.27 | 7.20323 x10 <sup>-5</sup> | 13.59 |
| 30 | Q6ZRC1 | C4orf50  | Uncharacterized protein C4orf50                             | DQGAHQASLDE<br>ATRLQEELQAK | 0.000±0.00 | 12.368±0.38 | 5.62894 x10 <sup>-7</sup> | 13.59 |
| 31 | Q8N7X1 | RBMXL3   | RNA-binding motif protein, X-linked-like-3                  | GFAFVTFESPADA<br>K         | 0.000±0.00 | 12.397±1.12 | 4.40949 x10 <sup>-5</sup> | 13.59 |
| 32 | A1L3X0 | ELOVL7   | Elongation of very long chain fatty acids protein 7         | TVHLYDNWIKDA<br>DPR        | 0.000±0.00 | 12.311±0.15 | 1.59981 x10 <sup>-8</sup> | 13.59 |
| 33 | Q15506 | SPA17    | Sperm surface protein Sp17                                  | KMKTNLSLQNEEK              | 0.000±0.00 | 12.285±0.32 | 3.23225 x10 <sup>-7</sup> | 13.58 |
| 34 | Q13508 | ART3     | Ecto-ADP-ribosyltransferase 3                               | LEDHGEK                    | 0.000±0.00 | 12.276±0.12 | 6.52518 x10 <sup>-9</sup> | 13.58 |
| 35 | Q8N8U2 | CDYL2    | Chromodomain Y-like protein 2                               | GLDSLFSYLQDK               | 0.000±0.00 | 12.434±2.44 | 9.16665 x10 <sup>-4</sup> | 13.58 |
| 36 | Q96EX3 | DYNC2I2  | Cytoplasmic dynein 2 intermediate chain 2                   | LDHGDWSTLK                 | 0.000±0.00 | 12.262±0.60 | 3.92431 x10 <sup>-6</sup> | 13.58 |
| 37 | Q99683 | MAP3K5   | Mitogen-activated protein kinase kinase kinase 5            | AFILKCFEPDPDK              | 0.000±0.00 | 12.253±0.36 | 4.77696 x10 <sup>-7</sup> | 13.58 |
| 38 | Q6NSI8 | SANBR    | SANT and BTB domain regulator of class switch recombination | FDPTQLTKGCKV<br>R          | 0.000±0.00 | 12.301±1.57 | 1.68757 x10 <sup>-4</sup> | 13.58 |
| 39 | Q8IUD6 | RNF135   | E3 ubiquitin-protein ligase RNF135                          | AFSSGVDLSMASP<br>K         | 0.000±0.00 | 12.261±1.01 | 2.97558 x10 <sup>-5</sup> | 13.58 |
| 40 | Q9BYG4 | PARD6G   | Partitioning defective 6 homolog gamma                      | DGASVRVTPHGL<br>EKVPGIFISR | 0.000±0.00 | 12.242±0.57 | 3.18797 x10 <sup>-6</sup> | 13.58 |
| 41 | Q6ZV29 | PNPLA7   | Patatin-like phospholipase domain-containing protein 7      | DLLTLMK                    | 0.000±0.00 | 12.325±1.94 | 3.87791 x10 <sup>-4</sup> | 13.58 |
| 42 | P03952 | KLKB1    | Plasma kallikrein                                           | EIIHQYK                    | 0.000±0.00 | 12.232±1.08 | 3.94375 x10 <sup>-5</sup> | 13.57 |
| 43 | Q9NR71 | ASAH2    | Neutral ceramidase                                          | SPYSYLQNPQSER              | 0.000±0.00 | 12.234±1.14 | 5.00258 x10 <sup>-5</sup> | 13.57 |
| 44 | Q00532 | CDKL1    | Cyclin-dependent kinase-like 1                              | EHNKPTRK                   | 0.000±0.00 | 12.220±1.27 | 7.6779 x10 <sup>-5</sup>  | 13.57 |
| 45 | Q06187 | BTK      | Tyrosine-protein kinase BTK                                 | DSSKAGK                    | 0.000±0.00 | 12.133±1.06 | 3.81578 x10 <sup>-5</sup> | 13.56 |
| 46 | Q8TAK5 | GABPB2   | GA-binding protein subunit beta-2                           | MTALHWATER                 | 0.000±0.00 | 12.082±0.38 | 6.62106 x10 <sup>-7</sup> | 13.56 |
| 47 | Q9Y6A4 | CFAP20   | Cilia- and flagella-associated protein 20                   | KYFTFEVQLDD<br>K           | 0.000±0.00 | 12.135±1.68 | 2.36845 x10 <sup>-4</sup> | 13.56 |
| 48 | P00352 | ALDH1A1  | Aldehyde dehydrogenase 1A1                                  | IFVEESYDEFVRR<br>SVER      | 0.000±0.00 | 12.061±0.51 | 2.1547 x10 <sup>-6</sup>  | 13.56 |
| 49 | P0CG30 | GSTT2B   | Glutathione S-transferase theta-2B                          | GLELFLDLVSQPS<br>R         | 0.000±0.00 | 12.090±1.41 | 1.18621 x10 <sup>-4</sup> | 13.56 |
| 50 | Q8WXX5 | DNAJC9   | DnaJ homolog subfamily C member 9                           | ISLEDIQAFEK                | 0.000±0.00 | 12.037±0.28 | 1.91604 x10 <sup>-7</sup> | 13.55 |
| 51 | Q5PSV4 | BRMS1L   | Breast cancer metastasis-suppressor 1-like protein          | DQLYKER                    | 0.000±0.00 | 12.122±1.83 | 3.31005 x10 <sup>-4</sup> | 13.55 |
| 52 | Q6ZVH6 | n/a      | Putative uncharacterized protein FLJ42569                   | TLLSPVCVPARDQ              | 0.000±0.00 | 12.032±0.19 | 4.09435 x10 <sup>-8</sup> | 13.55 |

|    |        |          |                                                   |                                     |            |             |                           |       |
|----|--------|----------|---------------------------------------------------|-------------------------------------|------------|-------------|---------------------------|-------|
|    |        |          |                                                   | RAPR                                |            |             |                           |       |
| 53 | P15882 | CHN1     | N-chimaerin                                       | FGSQTRNFRLYYD<br>GK                 | 0.000±0.00 | 12.046±0.74 | 9.25066 x10 <sup>-6</sup> | 13.55 |
| 54 | A3KN83 | SBNO1    | Protein strawberry notch homolog 1                | DYNNIGKFLNR                         | 0.000±0.00 | 12.057±1.31 | 9.16732 x10 <sup>-5</sup> | 13.55 |
| 55 | Q6UVW9 | CLEC2A   | C-type lectin domain family 2 member A            | AELAQIDTQEDM<br>EFLKR               | 0.000±0.00 | 12.132±2.23 | 7.03358 x10 <sup>-4</sup> | 13.55 |
| 56 | Q86TN4 | TRPT1    | tRNA 2'-phosphotransferase 1                      | KQRFALQLGDPST<br>GLLIR              | 0.000±0.00 | 12.003±0.72 | 8.674 x10 <sup>-6</sup>   | 13.55 |
| 57 | Q9P2T0 | THEG     | Testicular haploid expressed gene protein         | DPRWEVLDVTKK                        | 0.000±0.00 | 12.122±2.22 | 6.99438 x10 <sup>-4</sup> | 13.55 |
| 58 | Q9HOR1 | AP5M1    | AP-5 complex subunit mu-1                         | APAPVTYGSLLL                        | 0.000±0.00 | 11.993±0.67 | 6.31729 x10 <sup>-6</sup> | 13.55 |
| 59 | Q06455 | RUNX1T1  | Protein CBFA2T1                                   | ALSLVIGDCR                          | 0.000±0.00 | 11.985±0.45 | 1.36253 x10 <sup>-6</sup> | 13.55 |
| 60 | Q5XUX0 | FBXO31   | F-box only protein 31                             | DEFSTKCNQTDH<br>HRMSGGR             | 0.000±0.00 | 11.943±0.74 | 9.9972 x10 <sup>-6</sup>  | 13.54 |
| 61 | P43268 | ETV4     | ETS translocation variant 4                       | FEGDIKQEGVGAF<br>R                  | 0.000±0.00 | 11.913±0.12 | 7.83781 x10 <sup>-9</sup> | 13.54 |
| 62 | O94966 | USP19    | Ubiquitin carboxyl-terminal hydrolase 19          | AVPPGNDPVSPA<br>MVRSR               | 0.000±0.00 | 11.907±0.51 | 2.19154 x10 <sup>-6</sup> | 13.54 |
| 63 | P07911 | UMOD     | Uromodulin                                        | DWVSVVTPAR                          | 0.000±0.00 | 11.888±0.90 | 2.19327 x10 <sup>-5</sup> | 13.53 |
| 64 | Q06730 | ZNF33A   | Zinc finger protein 33A                           | SCQCNECGK                           | 0.000±0.00 | 11.870±0.66 | 6.24542 x10 <sup>-6</sup> | 13.53 |
| 65 | Q7L7X3 | TAOK1    | Serine/threonine-protein kinase TAO1              | AGNILLTEPGQVK                       | 0.000±0.00 | 11.897±1.54 | 1.8117 x10 <sup>-4</sup>  | 13.53 |
| 66 | Q14140 | SERTAD2  | SERTA domain-containing protein 2                 | IVSPCDGPSK                          | 0.000±0.00 | 11.823±0.31 | 3.09722 x10 <sup>-7</sup> | 13.53 |
| 67 | P20813 | CYP2B6   | Cytochrome P450 2B6                               | AEAFSGR                             | 0.000±0.00 | 11.817±0.46 | 1.52088 x10 <sup>-6</sup> | 13.53 |
| 68 | O95171 | SCEL     | Sciellin                                          | ATISRYSSDDTLD<br>RISDR              | 0.000±0.00 | 11.806±0.60 | 4.39198 x10 <sup>-6</sup> | 13.53 |
| 69 | Q5JVX7 | C1orf141 | Uncharacterized protein C1orf141                  | EDKSCSITK                           | 0.000±0.00 | 11.800±0.44 | 1.27551 x10 <sup>-6</sup> | 13.53 |
| 70 | P21506 | ZNF10    | Zinc finger protein 10                            | EKPYECK                             | 0.000±0.00 | 11.863±1.54 | 1.83632 x10 <sup>-4</sup> | 13.53 |
| 71 | Q8IYJ2 | C10orf67 | Uncharacterized protein C10orf67, mitochondrial   | EADRLNKSWEK                         | 0.000±0.00 | 11.811±1.02 | 3.71844 x10 <sup>-5</sup> | 13.52 |
| 72 | Q9NWS6 | FAM118A  | Protein FAM118A                                   | DSVEKTTNRSEQK                       | 0.000±0.00 | 11.788±0.49 | 1.94509 x10 <sup>-5</sup> | 13.52 |
| 73 | Q9HCH3 | CPNE5    | Copine-5                                          | ALCNGDYDR                           | 0.000±0.00 | 11.777±0.65 | 6.3098 x10 <sup>-6</sup>  | 13.52 |
| 74 | Q8TAM2 | TTC8     | Tetratricopeptide repeat protein 8                | LGMYREAEK                           | 0.000±0.00 | 11.774±0.84 | 1.71001 x10 <sup>-5</sup> | 13.52 |
| 75 | P12035 | KRT3     | Keratin, type II cytoskeletal 3                   | AGGFGGGR                            | 0.000±0.00 | 11.764±0.71 | 8.98623 x10 <sup>-6</sup> | 13.52 |
| 76 | Q15569 | TESK1    | Dual specificity testis-specific protein kinase 1 | EDLRGGK                             | 0.000±0.00 | 11.755±0.74 | 1.05105 x10 <sup>-5</sup> | 13.52 |
| 77 | A8MYZ6 | FOXO6    | Forkhead box protein O6                           | LTLSQIYDWMVR                        | 0.000±0.00 | 11.744±0.65 | 6.12588 x10 <sup>-6</sup> | 13.52 |
| 78 | Q8N8Y2 | ATP6V0D2 | V-type proton ATPase subunit d 2                  | EVQMNVLAFNR                         | 0.000±0.00 | 11.851±2.00 | 5.07703 x10 <sup>-4</sup> | 13.52 |
| 79 | O00462 | MANBA    | Beta-mannosidase                                  | LPQSTDPLRFTKD<br>TIYLTQVMQAQC<br>VK | 0.000±0.00 | 11.724±0.30 | 2.95841 x10 <sup>-7</sup> | 13.52 |
| 80 | Q6ZMT1 | STAC2    | SH3 and cysteine-rich domain-containing protein 2 | CCQPFSGNKEQG<br>YMSLK               | 0.000±0.00 | 11.720±0.31 | 3.11859 x10 <sup>-7</sup> | 13.52 |

|     |        |         |                                                                       |                                |            |             |                           |       |
|-----|--------|---------|-----------------------------------------------------------------------|--------------------------------|------------|-------------|---------------------------|-------|
| 81  | Q9P291 | ARMCX1  | Armadillo repeat-containing X-linked protein 1                        | ELGGVPIIAK                     | 0.000±0.00 | 11.765±1.30 | 9.77171 x10 <sup>-5</sup> | 13.52 |
| 82  | Q93074 | MED12   | Mediator of RNA polymerase II transcription subunit 12                | AYMNLAK                        | 0.000±0.00 | 11.745±1.18 | 6.71496 x10 <sup>-5</sup> | 13.51 |
| 83  | Q9BYW3 | DEFB126 | Beta-defensin 126                                                     | KCKPEEMHVK                     | 0.000±0.00 | 11.703±0.34 | 4.69447 x10 <sup>-7</sup> | 13.51 |
| 84  | Q96RI9 | TAAR9   | Trace amine-associated receptor 9                                     | IESTASQAQSSSES<br>YKERVAK      | 0.000±0.00 | 11.705±0.57 | 3.85247 x10 <sup>-6</sup> | 13.51 |
| 85  | P47712 | PLA2G4A | Cytosolic phospholipase A2                                            | GAFGDMLDTPDP<br>YVELFISTTPDSRK | 0.000±0.00 | 11.714±1.02 | 3.78866 x10 <sup>-5</sup> | 13.51 |
| 86  | Q9UI08 | EVL     | Ena/VASP-like protein                                                 | AASQSDKPAEK                    | 0.000±0.00 | 11.686±0.51 | 2.38456 x10 <sup>-6</sup> | 13.51 |
| 87  | P55795 | HNRNPH2 | Heterogeneous nuclear ribonucleoprotein H2                            | AEVRTHYDPPR                    | 0.000±0.00 | 11.682±0.47 | 1.71666 x10 <sup>-6</sup> | 13.51 |
| 88  | O43159 | RRP8    | Ribosomal RNA-processing protein 8                                    | CHKQALVGSDSA<br>EDEKR          | 0.000±0.00 | 11.695±1.00 | 3.54118 x10 <sup>-5</sup> | 13.51 |
| 89  | Q15349 | RPS6KA2 | Ribosomal protein S6 kinase alpha-2                                   | ADPSQFELLK                     | 0.000±0.00 | 11.698±1.15 | 6.07554 x10 <sup>-5</sup> | 13.51 |
| 90  | Q8NHS4 | CLHC1   | Clathrin heavy chain linker domain-containing protein 1               | CLALAQIVYSECG<br>LHK           | 0.000±0.00 | 11.699±1.43 | 1.45464 x10 <sup>-4</sup> | 13.51 |
| 91  | Q5T7N3 | KANK4   | KN motif and ankyrin repeat domain-containing protein 4               | AGGNGTK                        | 0.000±0.00 | 11.691±1.33 | 1.0784 x10 <sup>-4</sup>  | 13.51 |
| 92  | Q96M60 | FAM227B | Protein FAM227B                                                       | GFWIHWK                        | 0.000±0.00 | 11.810±2.60 | 1.41484x10 <sup>-3</sup>  | 13.51 |
| 93  | Q92574 | TSC1    | Hamartin                                                              | EVEMMKAAAYRK                   | 0.000±0.00 | 11.620±0.38 | 7.50105 x10 <sup>-7</sup> | 13.50 |
| 94  | Q6UX07 | DHRS13  | Dehydrogenase/reductase SDR family member 13                          | LDRPVVGWR                      | 0.000±0.00 | 11.634±0.81 | 1.53043 x10 <sup>-5</sup> | 13.50 |
| 95  | Q9NVM6 | DNAJC17 | DnaJ homolog subfamily C member 17                                    | CKKEDESK                       | 0.000±0.00 | 11.621±1.09 | 5.0263 x10 <sup>-5</sup>  | 13.50 |
| 96  | Q12770 | SCAP    | Sterol regulatory element-binding protein cleavage-activating protein | DLLFGVPGK                      | 0.000±0.00 | 11.637±1.55 | 2.02321 x10 <sup>-4</sup> | 13.50 |
| 97  | Q9NX76 | CMTM6   | CKLF-like MARVEL transmembrane domain-containing protein 6            | AEALTEPLNA                     | 0.000±0.00 | 11.565±0.21 | 7.91512 x10 <sup>-8</sup> | 13.50 |
| 98  | Q9POU4 | CXXC1   | CXXC-type zinc finger protein 1                                       | AGSGTGVGAMLA<br>R              | 0.000±0.00 | 11.565±0.54 | 3.15013 x10 <sup>-6</sup> | 13.50 |
| 99  | O75061 | DNAJC6  | Putative tyrosine-protein phosphatase auxilin                         | DTLKDTSSR                      | 0.000±0.00 | 11.598±1.23 | 8.3058 x10 <sup>-5</sup>  | 13.50 |
| 100 | P14136 | GFAP    | Glial fibrillary acidic protein                                       | ETSLDTKSVSEGH<br>LK            | 0.000±0.00 | 11.587±1.26 | 9.0285 x10 <sup>-5</sup>  | 13.49 |
| 101 | Q6ZVH7 | ESPNL   | Espin-like protein                                                    | EASASPPRSEAQR                  | 0.000±0.00 | 11.762±2.73 | 1.71230 x10 <sup>-4</sup> | 13.49 |
| 102 | Q93084 | ATP2A3  | Sarcoplasmic/endoplasmic reticulum calcium ATPase 3                   | EFTLEFSR                       | 0.000±0.00 | 11.526±0.22 | 8.31921 x10 <sup>-8</sup> | 13.49 |
| 103 | Q6P444 | MTRF2   | Mitochondrial fission regulator 2                                     | DIPNMLDVLK                     | 0.000±0.00 | 11.537±0.75 | 1.17292 x10 <sup>-5</sup> | 13.49 |
| 104 | Q9BZ67 | FRMD8   | FERM domain-containing protein 8                                      | ELQIHDEEVLR                    | 0.000±0.00 | 11.533±0.86 | 2.03082 x10 <sup>-5</sup> | 13.49 |
| 105 | Q15631 | TSN     | Translin                                                              | EAVTEILGIEPDR                  | 0.000±0.00 | 11.529±0.94 | 2.92579 x10 <sup>-5</sup> | 13.49 |
| 106 | Q6ZQY7 | n/a     | Putative uncharacterized protein FLJ46792                             | TVQGEDRNTMFR                   | 0.000±0.00 | 11.484±0.32 | 3.81154 x10 <sup>-7</sup> | 13.49 |
| 107 | Q8IYU2 | HACE1   | E3 ubiquitin-protein ligase HACE1                                     | IIFDHFHFLLECP<br>LMSR          | 0.000±0.00 | 11.525±1.26 | 9.33637 x10 <sup>-5</sup> | 13.49 |

|     |        |          |                                                                               |                           |            |             |                           |       |
|-----|--------|----------|-------------------------------------------------------------------------------|---------------------------|------------|-------------|---------------------------|-------|
| 108 | Q6VAB6 | KSR2     | Kinase suppressor of Ras 2                                                    | DNEDQLKAFKR               | 0.000±0.00 | 11.471±0.29 | 2.70988 x10 <sup>-7</sup> | 13.49 |
| 109 | Q9UKB1 | FBXW11   | F-box/WD repeat-containing protein 11                                         | EKDLCIK                   | 0.000±0.00 | 11.469±0.37 | 7.28789 x10 <sup>-7</sup> | 13.48 |
| 110 | Q9H6V9 | LDAH     | Lipid droplet-associated hydrolase                                            | AFLLFPTIERMSES<br>PNGR    | 0.000±0.00 | 11.486±0.96 | 3.17017 x10 <sup>-5</sup> | 13.48 |
| 111 | O15393 | TMPRSS2  | Transmembrane protease serine 2                                               | AACRDMGYK                 | 0.000±0.00 | 11.461±0.44 | 1.42682 x10 <sup>-6</sup> | 13.48 |
| 112 | Q6P2P2 | PRMT9    | Protein arginine N-methyltransferase 9                                        | ETLEFWLRHVED<br>ESAMLQRPK | 0.000±0.00 | 11.450±0.15 | 1.8394 x10 <sup>-8</sup>  | 13.48 |
| 113 | P78395 | PRAME    | Melanoma antigen preferentially expressed in tumors                           | IFAMPMQDIKMIL<br>K        | 0.000±0.00 | 11.481±1.10 | 5.52893 x10 <sup>-5</sup> | 13.48 |
| 114 | Q9Y5A6 | ZSCAN21  | Zinc finger and SCAN domain-containing protein 21                             | AFSNSSNLTKHR              | 0.000±0.00 | 11.500±1.43 | 1.53618 x10 <sup>-4</sup> | 13.48 |
| 115 | Q96MK3 | FAM20A   | Pseudokinase FAM20A                                                           | FSDFGKAMFKPM<br>R         | 0.000±0.00 | 11.46±0.91  | 2.58635 x10 <sup>-5</sup> | 13.48 |
| 116 | Q9HB29 | IL1RL2   | Interleukin-1 receptor-like 2                                                 | LYDAYVLYPKPH<br>KESQR     | 0.000±0.00 | 11.461±0.96 | 3.26375 x10 <sup>-5</sup> | 13.48 |
| 117 | Q7Z402 | TMC7     | Transmembrane channel-like protein 7                                          | LTEAQRDMRN                | 0.000±0.00 | 11.469±1.14 | 6.36731 x10 <sup>-5</sup> | 13.48 |
| 118 | Q7Z3T8 | ZFYVE16  | Zinc finger FYVE domain-containing protein 16                                 | CKSILLQSLIEGME<br>DRK     | 0.000±0.00 | 11.450±0.92 | 2.75211 x10 <sup>-5</sup> | 13.48 |
| 119 | Q99583 | MNT      | Max-binding protein MNT                                                       | EKEYEHMER                 | 0.000±0.00 | 11.527±1.96 | 5.2003 x10 <sup>-4</sup>  | 13.48 |
| 120 | Q9UMX0 | UBQLN1   | Ubiquilin-1                                                                   | ALSNLESIPGGYN<br>ALRR     | 0.000±0.00 | 11.458±1.16 | 6.91014 x10 <sup>-5</sup> | 13.48 |
| 121 | Q9UNK0 | STX8     | Syntaxin-8                                                                    | IQQRNQYERK                | 0.000±0.00 | 11.428±0.58 | 4.26402 x10 <sup>-6</sup> | 13.48 |
| 122 | O00170 | AIP      | AH receptor-interacting protein                                               | VIQEGRGELPDFQ<br>DGTK     | 0.000±0.00 | 11.403±0.10 | 3.34228 x10 <sup>-9</sup> | 13.48 |
| 123 | Q17RS7 | GEN1     | Flap endonuclease GEN homolog 1                                               | DLPGIPLQNESR              | 0.000±0.00 | 11.397±0.51 | 2.74243 x10 <sup>-6</sup> | 13.48 |
| 124 | O95996 | APC2     | Adenomatous polyposis coli protein 2                                          | AFTRERPQGR                | 0.000±0.00 | 11.384±0.23 | 1.04928 x10 <sup>-7</sup> | 13.47 |
| 125 | Q86UD0 | SAPCD2   | Suppressor APC domain-containing protein 2                                    | APLAGPSAAAR               | 0.000±0.00 | 11.429±1.26 | 9.59261 x10 <sup>-5</sup> | 13.47 |
| 126 | Q96MC2 | DRC1     | Dynein regulatory complex protein 1                                           | ELEYLNRMK                 | 0.000±0.00 | 11.587±2.55 | 1.41259 x10 <sup>-3</sup> | 13.47 |
| 127 | Q68CR7 | LRRC66   | Leucine-rich repeat-containing protein 66                                     | KEEWKIK                   | 0.000±0.00 | 11.386±0.56 | 3.88844 x10 <sup>-6</sup> | 13.47 |
| 128 | Q9UN19 | DAPP1    | Dual adapter for phosphotyrosine and 3-phosphotyrosine and 3-phosphoinositide | DSVKHFHVEYTG<br>YSFK      | 0.000±0.00 | 11.380±0.37 | 7.74329 x10 <sup>-7</sup> | 13.47 |
| 129 | Q6PI48 | DARS2    | Aspartate--tRNA ligase, mitochondrial                                         | LICLVTGSPSIRDV<br>IAFPK   | 0.000±0.00 | 11.608±2.99 | 2.54841 x10 <sup>-3</sup> | 13.47 |
| 130 | Q6ZRI6 | C15orf39 | Uncharacterized protein C15orf39                                              | AEKRPLR                   | 0.000±0.00 | 11.398±1.10 | 5.7289 x10 <sup>-5</sup>  | 13.47 |
| 131 | Q9NZ63 | C9orf78  | Splicing factor C9orf78                                                       | GDSESEDEQDSE<br>EVR       | 0.000±0.00 | 11.355±0.35 | 5.85194 x10 <sup>-7</sup> | 13.47 |
| 132 | Q9Y6C2 | EMILIN1  | EMILIN-1                                                                      | RFLRPRYR                  | 0.000±0.00 | 11.382±1.54 | 2.14136 x10 <sup>-4</sup> | 13.47 |
| 133 | Q86VG3 | IFTAP    | Intraflagellar transport-associated protein                                   | DTSPDLEKSCD               | 0.000±0.00 | 11.391±1.71 | 3.22028 x10 <sup>-4</sup> | 13.46 |
| 134 | P26951 | IL3RA    | Interleukin-3 receptor subunit alpha                                          | AQQLTWDLNR                | 0.000±0.00 | 11.303±0.57 | 4.21678 x10 <sup>-6</sup> | 13.46 |

|     |        |          |                                                                   |                            |            |             |                           |       |
|-----|--------|----------|-------------------------------------------------------------------|----------------------------|------------|-------------|---------------------------|-------|
| 135 | O00214 | LGALS8   | Galectin-8                                                        | AGCIVCNTLINEK              | 0.000±0.00 | 11.317±1.01 | 4.11969 x10 <sup>-5</sup> | 13.46 |
| 136 | Q9H871 | RMND5A   | E3 ubiquitin-protein transferase RMND5A                           | DQCVTVERELEK               | 0.000±0.00 | 11.297±0.59 | 4.92876 x10 <sup>-6</sup> | 13.46 |
| 137 | Q9NPD5 | SLCO1B3  | Solute carrier organic anion transporter family member 1B3        | ISITQIERR                  | 0.000±0.00 | 11.332±1.28 | 1.05598 x10 <sup>-4</sup> | 13.46 |
| 138 | Q96GM8 | TOE1     | Target of EGR1 protein 1                                          | AVCHAARTR                  | 0.000±0.00 | 11.325±1.53 | 2.1329 x10 <sup>-4</sup>  | 13.46 |
| 139 | Q8WX92 | NELFB    | Negative elongation factor B                                      | LEALQKALEPTGQSGEAVK        | 0.000±0.00 | 11.290±1.22 | 8.80329 x10 <sup>-5</sup> | 13.46 |
| 140 | Q92630 | DYRK2    | Dual specificity tyrosine-phosphorylation-regulated kinase 2      | ATPMTPEQAMK                | 0.000±0.00 | 11.270±0.90 | 2.65254 x10 <sup>-5</sup> | 13.46 |
| 141 | Q495T6 | MMEL1    | Membrane metallo-endopeptidase-like 1                             | AYLKWMAEGGK                | 0.000±0.00 | 11.248±0.42 | 1.27004 x10 <sup>-6</sup> | 13.46 |
| 142 | Q11130 | FUT7     | Alpha-(1,3)-fucosyltransferase 7                                  | CHLSANRSLLASADAVVFHHRELQTR | 0.000±0.00 | 11.244±0.45 | 1.64204 x10 <sup>-6</sup> | 13.46 |
| 143 | Q7Z7G0 | ABI3BP   | Target of Nesh-SH3                                                | DNVEGGIWSK                 | 0.000±0.00 | 11.264±0.92 | 2.94279 x10 <sup>-5</sup> | 13.46 |
| 144 | A6NMZ2 | SNTN     | Sentan                                                            | AIATTALIFRNSSDSDGK         | 0.000±0.00 | 11.248±0.62 | 6.14909 x10 <sup>-6</sup> | 13.46 |
| 145 | Q96RR1 | TWNK     | Twinkle mtDNA helicase                                            | ASQEADNVLILQDR             | 0.000±0.00 | 11.282±1.30 | 1.14881 x10 <sup>-4</sup> | 13.46 |
| 146 | Q6ZRG5 | n/a      | Putative uncharacterized protein FLJ43944                         | EVEPSATQQEASGHPLK          | 0.000±0.00 | 11.226±0.49 | 2.43435 x10 <sup>-6</sup> | 13.45 |
| 147 | Q8IV32 | CCDC71   | Coiled-coil domain-containing protein 71                          | AVHWSWR                    | 0.000±0.00 | 11.347±2.17 | 8.19743 x10 <sup>-4</sup> | 13.45 |
| 148 | P30046 | DDT      | D-dopachrome decarboxylase                                        | FFPLESWQIGK                | 0.000±0.00 | 11.213±0.27 | 2.31888 x10 <sup>-7</sup> | 13.45 |
| 149 | Q9Y264 | ANGPT4   | Angiopoietin-4                                                    | ENGTVNFQRNWKDYK            | 0.000±0.00 | 11.229±0.96 | 3.52307 x10 <sup>-5</sup> | 13.45 |
| 150 | Q96KP6 | TNIP3    | TNFAIP3-interacting protein 3                                     | LNEELHELK                  | 0.000±0.00 | 11.228±0.95 | 3.31926 x10 <sup>-5</sup> | 13.45 |
| 151 | Q2NKQ1 | SGSM1    | Small G protein signaling modulator 1                             | APLKLLCDNMK                | 0.000±0.00 | 11.258±1.40 | 1.5446 x10 <sup>-4</sup>  | 13.45 |
| 152 | Q9H2W6 | MRPL46   | 39S ribosomal protein L46, mitochondrial                          | ALDENQRLAK                 | 0.000±0.00 | 11.211±0.64 | 6.84758 x10 <sup>-6</sup> | 13.45 |
| 153 | Q8N3E9 | PLCD3    | 1-phosphatidylinositol 4,5-bisphosphate phosphodiesterase delta-3 | IEIHGVPADCAR               | 0.000±0.00 | 11.186±0.02 | 2.6777 x10 <sup>-12</sup> | 13.45 |
| 154 | P55316 | FOXG1    | Forkhead box protein G1                                           | EVKMIPK                    | 0.000±0.00 | 11.278±1.76 | 3.74923 x10 <sup>-4</sup> | 13.45 |
| 155 | Q6P6B7 | ANKRD16  | Ankyrin repeat domain-containing protein 16                       | AAVTGQDEAIR                | 0.000±0.00 | 11.176±0.54 | 3.54681 x10 <sup>-6</sup> | 13.45 |
| 156 | P10155 | RO60     | RNA-binding protein RO60                                          | ALLQEMPLTALLR              | 0.000±0.00 | 11.226±1.54 | 2.28122 x10 <sup>-4</sup> | 13.45 |
| 157 | Q6KF10 | GDF6     | Growth/differentiation factor 6                                   | ALLVVVTRSQR                | 0.000±0.00 | 11.201±1.18 | 8.13813 x10 <sup>-5</sup> | 13.45 |
| 158 | Q9P2N6 | KANSL3   | KAT8 regulatory NSL complex subunit 3                             | ALQSDRLAR                  | 0.000±0.00 | 11.199±1.25 | 1.00648 x10 <sup>-4</sup> | 13.44 |
| 159 | Q96LC7 | SIGLEC10 | Sialic acid-binding Ig-like lectin 10                             | AVTETTK                    | 0.000±0.00 | 11.154±0.41 | 1.19477 x10 <sup>-6</sup> | 13.44 |
| 160 | O94769 | ECM2     | Extracellular matrix protein 2                                    | ALHFRLRNNNK                | 0.000±0.00 | 11.152±0.37 | 7.79895 x10 <sup>-7</sup> | 13.44 |
| 161 | Q96BN8 | OTULIN   | Ubiquitin thioesterase otulin                                     | AIELYNDKEK                 | 0.000±0.00 | 11.142±0.11 | 7.43929 x10 <sup>-9</sup> | 13.44 |
| 162 | Q96LA5 | FCRL2    | Fc receptor-like protein 2                                        | APGGQVTEGQK                | 0.000±0.00 | 11.215±1.67 | 3.11195 x10 <sup>-4</sup> | 13.44 |
| 163 | Q8NCN2 | ZBTB34   | Zinc finger and BTB domain-containing protein 34                  | IESPERTDVYVEQ              | 0.000±0.00 | 11.146±1.00 | 4.24002 x10 <sup>-5</sup> | 13.44 |

|     |        |          |                                                      |                         |            |             |                           |       |
|-----|--------|----------|------------------------------------------------------|-------------------------|------------|-------------|---------------------------|-------|
|     |        |          |                                                      | K                       |            |             |                           |       |
| 164 | Q71H61 | ILDR2    | Immunoglobulin-like domain-containing receptor 2     | GYRIQADKER              | 0.000±0.00 | 11.126±0.63 | 7.00522 x10 <sup>-6</sup> | 13.44 |
| 165 | A4D1Z8 | GRIFIN   | Grifin                                               | GLSWGDR                 | 0.000±0.00 | 11.115±0.27 | 2.29345 x10 <sup>-7</sup> | 13.44 |
| 166 | Q08881 | ITK      | Tyrosine-protein kinase ITK/TSK                      | NCLVGENQVIK             | 0.000±0.00 | 11.131±0.79 | 1.66013 x10 <sup>-5</sup> | 13.44 |
| 167 | Q96CB8 | INTS12   | Integrator complex subunit 12                        | GIDSSYRPSQK             | 0.000±0.00 | 11.163±1.37 | 1.46479 x10 <sup>-4</sup> | 13.44 |
| 168 | O60240 | PLIN1    | Perilipin-1                                          | GLDHLEEK                | 0.000±0.00 | 11.183±1.69 | 3.33557 x10 <sup>-4</sup> | 13.44 |
| 169 | Q76M96 | CCDC80   | Coiled-coil domain-containing protein 80             | KAQDKILSNEYEE<br>K      | 0.000±0.00 | 11.223±2.13 | 7.96522 x10 <sup>-4</sup> | 13.44 |
| 170 | Q13227 | GPS2     | G protein pathway suppressor 2                       | KVLHEEEK                | 0.000±0.00 | 11.147±1.38 | 1.50671 x10 <sup>-4</sup> | 13.44 |
| 171 | Q8N7C4 | TMEM217  | Transmembrane protein 217                            | ISTAEILHSRNLK           | 0.000±0.00 | 11.140±1.34 | 1.35634 x10 <sup>-4</sup> | 13.44 |
| 172 | P24385 | CCND1    | G1/S-specific cyclin-D1                              | EVLPSMRK                | 0.000±0.00 | 11.087±0.72 | 1.15904 x10 <sup>-5</sup> | 13.43 |
| 173 | O15121 | DEGS1    | Sphingolipid delta                                   | REILAKYPEIK             | 0.000±0.00 | 11.091±0.92 | 3.09494 x10 <sup>-5</sup> | 13.43 |
| 174 | Q9UN67 | PCDHB10  | Protocadherin beta-10                                | AVRELCFPR               | 0.000±0.00 | 11.061±0.09 | 2.82828 x10 <sup>-9</sup> | 13.43 |
| 175 | Q9P2J3 | KLHL9    | Kelch-like protein 9                                 | AACRWLRLEDPR            | 0.000±0.00 | 11.069±0.58 | 5.12984 x10 <sup>-6</sup> | 13.43 |
| 176 | Q16270 | IGFBP7   | Insulin-like growth factor-binding protein 7         | DACGCCPMCAR             | 0.000±0.00 | 11.056±0.78 | 1.66038 x10 <sup>-5</sup> | 13.43 |
| 177 | Q6IAA8 | LAMTOR1  | Ragulator complex protein LAMTOR1                    | IAAYAYSALSQIR<br>VDAK   | 0.000±0.00 | 11.085±1.30 | 1.20806 x10 <sup>-4</sup> | 13.43 |
| 178 | P21980 | TGM2     | Protein-glutamine gamma-glutamyltransferase 2        | LVVRRGQPFWLT<br>LHFEGR  | 0.000±0.00 | 11.130±1.79 | 4.20409 x10 <sup>-4</sup> | 13.43 |
| 179 | O75663 | TIPRL    | TIP41-like protein                                   | FFLRIDGVLIRMN<br>DTR    | 0.000±0.00 | 11.047±0.75 | 1.40816 x10 <sup>-5</sup> | 13.43 |
| 180 | Q8N4C9 | C17orf78 | Uncharacterized protein C17orf78                     | LCQCQWLWR               | 0.000±0.00 | 11.035±0.98 | 4.03534 x10 <sup>-5</sup> | 13.43 |
| 181 | P30876 | POLR2B   | DNA-directed RNA polymerase II subunit RPB2          | ICRPLLIVEK              | 0.000±0.00 | 11.002±0.51 | 3.00786 x10 <sup>-6</sup> | 13.42 |
| 182 | Q8WUA4 | GTF3C2   | General transcription factor 3C polypeptide 2        | AYFTAPR                 | 0.000±0.00 | 11.002±0.59 | 5.38512 x10 <sup>-6</sup> | 13.42 |
| 183 | Q86UE3 | ZNF546   | Zinc finger protein 546                              | AFSRVRDLR               | 0.000±0.00 | 11.017±1.02 | 4.80195 x10 <sup>-5</sup> | 13.42 |
| 184 | Q9P2N2 | ARHGAP28 | Rho GTPase-activating protein 28                     | AQPPNAESR               | 0.000±0.00 | 11.118±2.10 | 7.9211 x10 <sup>-4</sup>  | 13.42 |
| 185 | Q9BTU6 | PI4K2A   | Phosphatidylinositol 4-kinase type 2-alpha           | AYPFYWAWLPQA<br>K       | 0.000±0.00 | 10.973±0.81 | 1.93933 x10 <sup>-5</sup> | 13.42 |
| 186 | F5H4B4 | FAM227A  | Protein FAM227A                                      | AIWLDSFWWIFHE<br>R      | 0.000±0.00 | 10.930±0.22 | 1.0045 x10 <sup>-7</sup>  | 13.42 |
| 187 | Q8ND07 | BBOF1    | Basal body-orientation factor 1                      | LIKTDESVDRAK            | 0.000±0.00 | 10.951±0.96 | 3.88246 x10 <sup>-5</sup> | 13.42 |
| 188 | Q8IUC8 | GALNT13  | Polypeptide N-acetylgalactosaminyltransferase 13     | GDRTLPR                 | 0.000±0.00 | 10.911±0.51 | 3.1302 x10 <sup>-6</sup>  | 13.41 |
| 189 | Q2M3M2 | SLC5A9   | Sodium/glucose cotransporter 4                       | LTSIEEPLWR              | 0.000±0.00 | 10.897±0.15 | 2.54121 x10 <sup>-8</sup> | 13.41 |
| 190 | Q86WJ1 | CHD1L    | Chromodomain-helicase-DNA-binding protein 1-like     | DLDAFENETAKK            | 0.000±0.00 | 10.967±1.58 | 2.74625 x10 <sup>-4</sup> | 13.41 |
| 191 | O94901 | SUN1     | SUN domain-containing protein 1                      | IGAVGQAVSR              | 0.000±0.00 | 10.913±0.89 | 2.86215 x10 <sup>-5</sup> | 13.41 |
| 192 | Q15555 | MAPRE2   | Microtubule-associated protein RP/EB family member 2 | QGQDAIPPPDGE<br>QIFNLPK | 0.000±0.00 | 10.942±1.50 | 2.25921 x10 <sup>-4</sup> | 13.41 |
| 193 | Q15940 | ZNF726P1 | Putative zinc finger protein 726P1                   | AFKQHSTLTTHKII          | 0.000±0.00 | 10.868±0.56 | 4.76416 x10 <sup>-6</sup> | 13.41 |

|     |        |          |                                                                     |                              |            |             |                           |       |
|-----|--------|----------|---------------------------------------------------------------------|------------------------------|------------|-------------|---------------------------|-------|
|     |        |          |                                                                     | CAEEK                        |            |             |                           |       |
| 194 | Q5TAA0 | TTC22    | Tetratricopeptide repeat protein 22                                 | ALGYGQQIPMEE<br>KR           | 0.000±0.00 | 10.862±0.74 | 1.3887 x10 <sup>-5</sup>  | 13.40 |
| 195 | Q8N5F7 | NKAP     | NF-kappa-B-activating protein                                       | EASGSGGR                     | 0.000±0.00 | 10.855±0.67 | 9.86261 x10 <sup>-6</sup> | 13.40 |
| 196 | Q5VT98 | PRAMEF20 | PRAME family member 20                                              | ESYDVRGIVCR                  | 0.000±0.00 | 10.848±0.63 | 7.71187 x10 <sup>-6</sup> | 13.40 |
| 197 | O15118 | NPC1     | NPC intracellular cholesterol transporter 1                         | FLPMFLSDNPNPK                | 0.000±0.00 | 10.855±0.86 | 2.56992 x10 <sup>-5</sup> | 13.40 |
| 198 | B4DS77 | SHISA9   | Protein shisa-9                                                     | LLGCFTELCLAR                 | 0.000±0.00 | 10.878±1.47 | 2.12063 x10 <sup>-4</sup> | 13.40 |
| 199 | Q8N5I9 | NOPCHAP1 | NOP protein chaperone 1                                             | LPNSEGGK                     | 0.000±0.00 | 10.843±0.99 | 4.61167 x10 <sup>-5</sup> | 13.40 |
| 200 | Q15464 | SHB      | SH2 domain-containing adapter protein B                             | LLNKCAASAAEES<br>GAGKK       | 0.000±0.00 | 10.825±1.05 | 5.8409 x10 <sup>-5</sup>  | 13.40 |
| 201 | P48506 | GCLC     | Glutamate--cysteine ligase catalytic subunit                        | FKPPPPNSDIGWR                | 0.000±0.00 | 10.803±0.76 | 1.65842 x10 <sup>-5</sup> | 13.40 |
| 202 | P01148 | GNRH1    | Progonadoliberin-1                                                  | DAENLIDSFQEIV<br>K           | 0.000±0.00 | 10.766±0.24 | 1.62258 x10 <sup>-7</sup> | 13.39 |
| 203 | Q9ULT6 | ZNRF3    | E3 ubiquitin-protein ligase ZNRF3                                   | CGLEHRAVSPAHP<br>FRRPK       | 0.000±0.00 | 10.793±0.95 | 3.92535 x10 <sup>-5</sup> | 13.39 |
| 204 | P33402 | GUCY1A2  | Guanylate cyclase soluble subunit alpha-2                           | DAEKNFHNISNR                 | 0.000±0.00 | 10.731±0.58 | 5.81817 x10 <sup>-6</sup> | 13.39 |
| 205 | Q96L12 | CALR3    | Calreticulin-3                                                      | DKGLQTTQNGR                  | 0.000±0.00 | 10.704±0.15 | 2.85618 x10 <sup>-8</sup> | 13.39 |
| 206 | P22415 | USF1     | Upstream stimulatory factor 1                                       | IIPDCSMESTKSGQ<br>SK         | 0.000±0.00 | 10.716±0.70 | 1.19706 x10 <sup>-5</sup> | 13.39 |
| 207 | O95450 | ADAMTS2  | A disintegrin and metalloproteinase with<br>thrombospondin motifs 2 | GLAAQEAQGR                   | 0.000±0.00 | 10.710±0.57 | 5.25561 x10 <sup>-6</sup> | 13.39 |
| 208 | P13535 | MYH8     | Myosin-8                                                            | AEKQRSDLR                    | 0.000±0.00 | 10.701±0.71 | 1.26974 x10 <sup>-5</sup> | 13.38 |
| 209 | Q08AE8 | SPIRE1   | Protein spire homolog 1                                             | ALDYGLK                      | 0.000±0.00 | 10.679±0.68 | 1.06583 x10 <sup>-5</sup> | 13.38 |
| 210 | O95825 | CRYZL1   | Quinone oxidoreductase-like protein 1                               | KDLFPVGREIAGI<br>VLDVGSK     | 0.000±0.00 | 10.666±0.59 | 6.01983 x10 <sup>-6</sup> | 13.38 |
| 211 | O43567 | RNF13    | E3 ubiquitin-protein ligase RNF13                                   | LPAEGLK                      | 0.000±0.00 | 10.646±0.35 | 7.92996 x10 <sup>-7</sup> | 13.38 |
| 212 | Q9Y512 | SAMM50   | Sorting and assembly machinery component 50<br>homolog              | DDIIICEIGDVFKA<br>K          | 0.000±0.00 | 10.652±0.82 | 2.34295 x10 <sup>-5</sup> | 13.38 |
| 213 | P0C7M6 | IQCF3    | IQ domain-containing protein F3                                     | GVLVRRLLVAA<br>LR            | 0.000±0.00 | 10.626±0.28 | 3.43844 x10 <sup>-7</sup> | 13.38 |
| 214 | Q5MCW4 | ZNF569   | Zinc finger protein 569                                             | HTGEKPYHCIECG<br>KAFSQKSHLVR | 0.000±0.00 | 10.640±0.72 | 1.41481 x10 <sup>-5</sup> | 13.37 |
| 215 | O43909 | EXTL3    | Exostosin-like 3                                                    | IQIPAAPIREEAAA<br>EIPHR      | 0.000±0.00 | 10.648±1.01 | 5.2623 x10 <sup>-5</sup>  | 13.37 |
| 216 | Q9Y2E5 | MAN2B2   | Epididymis-specific alpha-mannosidase                               | EIRTFIHFQQQ                  | 0.000±0.00 | 10.675±1.45 | 2.17842 x10 <sup>-4</sup> | 13.37 |
| 217 | Q9H777 | ELAC1    | Zinc phosphodiesterase ELAC protein 1                               | TILLDSEENSYLLF<br>DDEQFVVK   | 0.000±0.00 | 10.618±0.60 | 6.61972 x10 <sup>-6</sup> | 13.37 |
| 218 | Q16877 | PFKFB4   | 6-phosphofructo-2-kinase/fructose-2,6-<br>bisphosphatase 4          | ATIFNFGQNGYK                 | 0.000±0.00 | 10.616±0.79 | 2.01477 x10 <sup>-5</sup> | 13.37 |

|     |                |          |                                                                    |                          |            |               |                           |       |
|-----|----------------|----------|--------------------------------------------------------------------|--------------------------|------------|---------------|---------------------------|-------|
| 219 | Q5TIA1         | MEI1     | Meiosis inhibitor protein 1                                        | AVRQAATAGTPG<br>PRR      | 0.000±0.00 | 10.721±2.04   | 8.05165 x10 <sup>-4</sup> | 13.37 |
| 220 | Q7RTU7         | SCX      | Basic helix-loop-helix transcription factor scleraxis              | AGGRRAGGGGPG<br>GRPGR    | 0.000±0.00 | 10.65 0± 1.53 | 2.72928 x10 <sup>-4</sup> | 13.37 |
| 221 | P56180         | TPTE     | Putative tyrosine-protein phosphatase TPTE                         | ESPHTSEFK                | 0.000±0.00 | 10.589±0.69   | 1.19576 x10 <sup>-5</sup> | 13.37 |
| 222 | P52737         | ZNF136   | Zinc finger protein 136                                            | DQNIKDHYKHR              | 0.000±0.00 | 10.622±1.41   | 1.9722 x10 <sup>-4</sup>  | 13.37 |
| 223 | Q00987         | MDM2     | E3 ubiquitin-protein ligase Mdm2                                   | GEISEKAK                 | 0.000±0.00 | 10.572±0.90   | 3.47051 x10 <sup>-5</sup> | 13.36 |
| 224 | Q8TEW6         | DOK4     | Docking protein 4                                                  | ATNFSDIVKQGYV<br>K       | 0.000±0.00 | 10.610±1.48   | 2.42791 x10 <sup>-4</sup> | 13.36 |
| 225 | Q13394         | MAB21L1  | Putative nucleotidyltransferase MAB21L1                            | CTGIWPR                  | 0.000±0.00 | 10.543±0.07   | 1.08506 x10 <sup>-9</sup> | 13.36 |
| 226 | A0A1B0GX9<br>5 | TRBV7-4  | T cell receptor beta variable 7-4                                  | IQRTEQGDSAVYL<br>CASSL   | 0.000±0.00 | 10.541±0.13   | 1.58698 x10 <sup>-8</sup> | 13.36 |
| 227 | P50336         | PPOX     | Protoporphyrinogen oxidase                                         | ELSIRSCFPSLFQA<br>EQTHR  | 0.000±0.00 | 10.555±0.75   | 1.69942 x10 <sup>-5</sup> | 13.36 |
| 228 | Q9Y5B6         | PAXBP1   | PAX3- and PAX7-binding protein 1                                   | DAYIGLCLPK               | 0.000±0.00 | 10.642±1.85   | 5.67603 x10 <sup>-4</sup> | 13.36 |
| 229 | Q8IWN7         | RPIL1    | Retinitis pigmentosa 1-like 1 protein                              | ADFGQDDLDF               | 0.000±0.00 | 10.636±2.05   | 8.51728 x10 <sup>-4</sup> | 13.36 |
| 230 | P04070         | PROC     | Vitamin K-dependent protein C                                      | LIDGKMTRR                | 0.000±0.00 | 10.584±1.62   | 3.49887 x10 <sup>-4</sup> | 13.36 |
| 231 | Q9UKP3         | ITGB1BP2 | Integrin beta-1-binding protein 2                                  | VFQAQMK                  | 0.000±0.00 | 10.503±0.51   | 3.57749 x10 <sup>-6</sup> | 13.36 |
| 232 | Q6ZN57         | ZFP2     | Zinc finger protein ZFP2                                           | RIHTGEKPYECMV<br>CGK     | 0.000±0.00 | 10.504±0.62   | 7.99835 x10 <sup>-6</sup> | 13.36 |
| 233 | Q9Y646         | CPQ      | Carboxypeptidase Q                                                 | AQNRSYER                 | 0.000±0.00 | 10.489±0.45   | 2.16245 x10 <sup>-6</sup> | 13.36 |
| 234 | Q5T7W0         | ZNF618   | Zinc finger protein 618                                            | APEGSPHGGSVRS<br>R       | 0.000±0.00 | 10.483±0.60   | 7.08536 x10 <sup>-6</sup> | 13.35 |
| 235 | P42263         | GRIA3    | Glutamate receptor 3                                               | ALKMVQVQGMT<br>GNIQFDYGR | 0.000±0.00 | 10.557±1.70   | 4.2415 x10 <sup>-4</sup>  | 13.35 |
| 236 | P17213         | BPI      | Bactericidal permeability-increasing protein                       | DDMIPKESK                | 0.000±0.00 | 10.488±0.83   | 2.59591 x10 <sup>-5</sup> | 13.35 |
| 237 | P07550         | ADRB2    | Beta-2 adrenergic receptor                                         | YQSLLTKNKAR              | 0.000±0.00 | 10.454±0.12   | 1.09158 x10 <sup>-8</sup> | 13.35 |
| 238 | Q8IX19         | MCEMP1   | Mast cell-expressed membrane protein 1                             | ELWNVSNSVQAC<br>EER      | 0.000±0.00 | 10.486±1.36   | 1.82361 x10 <sup>-4</sup> | 13.35 |
| 239 | Q9NRB3         | CHST12   | Carbohydrate sulfotransferase 12                                   | FLSAGVKQSDLPR            | 0.000±0.00 | 10.514±1.83   | 5.74352 x10 <sup>-4</sup> | 13.35 |
| 240 | Q15067         | ACOX1    | Peroxisomal acyl-coenzyme A oxidase 1                              | AEVHESYKHLK              | 0.000±0.00 | 10.458±1.31   | 1.58399 x10 <sup>-4</sup> | 13.34 |
| 241 | Q86X24         | HORMAD1  | HORMA domain-containing protein 1                                  | IVLHHFDSSSQES<br>VPKRR   | 0.000±0.00 | 10.407±0.39   | 1.37615 x10 <sup>-6</sup> | 13.34 |
| 242 | Q14781         | CBX2     | Chromobox protein homolog 2                                        | GELGMSPPGSKIP<br>K       | 0.000±0.00 | 10.456±1.39   | 1.99056 x10 <sup>-4</sup> | 13.34 |
| 243 | Q330K2         | NDUFAF6  | NADH dehydrogenase                                                 | DYEGYLCSLLPA<br>ESR      | 0.000±0.00 | 10.428±1.08   | 7.39867 x10 <sup>-5</sup> | 13.34 |
| 244 | O14672         | ADAM10   | Disintegrin and metalloproteinase domain-<br>containing protein 10 | DDKELCHVCCMK<br>K        | 0.000±0.00 | 10.412±0.84   | 2.79254 x10 <sup>-5</sup> | 13.34 |

|     |        |           |                                                       |                                        |            |             |                           |       |
|-----|--------|-----------|-------------------------------------------------------|----------------------------------------|------------|-------------|---------------------------|-------|
| 245 | Q13243 | SRSF5     | Serine/arginine-rich splicing factor 5                | LIVENLSSR                              | 0.000±0.00 | 10.383±0.17 | 4.39242 x10 <sup>-8</sup> | 13.34 |
| 246 | Q6UXZ3 | CD300LD   | CMRF35-like molecule 5                                | KNRVSIR                                | 0.000±0.00 | 10.635±2.98 | 3.47086 x10 <sup>-3</sup> | 13.34 |
| 247 | Q8N442 | GUF1      | Translation factor GUF1, mitochondrial                | AQTASLFYNC<br>EGK                      | 0.000±0.00 | 10.372±0.11 | 8.17183 x10 <sup>-9</sup> | 13.34 |
| 248 | Q6IBW4 | NCAPH2    | Condensin-2 complex subunit H2                        | KDFRMNTC<br>VPHPR                      | 0.000±0.00 | 10.404±1.14 | 9.29897 x10 <sup>-5</sup> | 13.34 |
| 249 | P05120 | SERPINB2  | Plasminogen activator inhibitor 2                     | ITNCILFFGR                             | 0.000±0.00 | 10.359±0.56 | 5.59788 x10 <sup>-6</sup> | 13.34 |
| 250 | Q96F63 | CCDC97    | Coiled-coil domain-containing protein 97              | DEEERYFD<br>EEPE<br>DAPSP<br>ELDGD     | 0.000±0.00 | 10.368±0.81 | 2.49631 x10 <sup>-5</sup> | 13.34 |
| 251 | Q92734 | TFG       | Protein TFG                                           | LTLFVNG<br>QPRPLE<br>SSQVK             | 0.000±0.00 | 10.322±0.25 | 2.28404 x10 <sup>-7</sup> | 13.33 |
| 252 | Q9Y5E9 | PCDHB14   | Protocadherin beta-14                                 | CTLLVK<br>VMDIND<br>NPPEV<br>TISSITK   | 0.000±0.00 | 10.341±1.23 | 1.29202 x10 <sup>-4</sup> | 13.33 |
| 253 | Q6GTX8 | LAIR1     | Leukocyte-associated immunoglobulin-like receptor 1   | ATVNG<br>LPEKDR                        | 0.000±0.00 | 10.244±0.64 | 1.03629 x10 <sup>-5</sup> | 13.32 |
| 254 | Q03169 | TNFAIP2   | Tumor necrosis factor alpha-induced protein 2         | ELMDRA<br>LELEAR<br>R                  | 0.000±0.00 | 10.243±0.68 | 1.30746 x10 <sup>-5</sup> | 13.32 |
| 255 | Q7Z2K6 | ERMP1     | Endoplasmic reticulum metalloproteinase 1             | EGAAA<br>APPPER                        | 0.000±0.00 | 10.352±2.02 | 8.97136 x10 <sup>-4</sup> | 13.32 |
| 256 | Q14696 | MESD      | LRP chaperone MESD                                    | DFLVG<br>QDR                           | 0.000±0.00 | 10.225±0.16 | 4.19162 x10 <sup>-8</sup> | 13.32 |
| 257 | Q8NB59 | SYT14     | Synaptotagmin-14                                      | LTLNS<br>MGQEMS<br>KCK                 | 0.000±0.00 | 10.238±0.79 | 2.35087 x10 <sup>-5</sup> | 13.32 |
| 258 | Q5TON1 | CFAP70    | Cilia- and flagella-associated protein 70             | AEFNQ<br>VVLG<br>D<br>SAK              | 0.000±0.00 | 10.247±0.99 | 5.78084 x10 <sup>-5</sup> | 13.32 |
| 259 | P20849 | COL9A1    | Collagen alpha-1                                      | GLPGV<br>EGPR                          | 0.000±0.00 | 10.212±0.16 | 3.56318 x10 <sup>-8</sup> | 13.32 |
| 260 | A6NFE3 | EFCAB10   | EF-hand calcium-binding domain-containing protein 10  | ETSSR<br>ELQAA<br>EYL<br>EK            | 0.000±0.00 | 10.222±0.80 | 2.46605 x10 <sup>-5</sup> | 13.32 |
| 261 | Q9BVQ7 | SPATA5L1  | Ribosome biogenesis protein SPATA5L1                  | AGAPGAR                                | 0.000±0.00 | 10.202±1.20 | 1.24002 x10 <sup>-4</sup> | 13.31 |
| 262 | Q2TAL6 | VWC2      | Brorin                                                | DEGGSGR                                | 0.000±0.00 | 10.153±0.25 | 2.33957 x10 <sup>-7</sup> | 13.31 |
| 263 | Q9UPZ9 | CILK1     | Serine/threonine-protein kinase ICK                   | NGILSN<br>PGK                          | 0.000±0.00 | 10.170±1.00 | 6.13182 x10 <sup>-5</sup> | 13.31 |
| 264 | O14798 | TNFRSF10C | Tumor necrosis factor receptor superfamily member 10C | QEEVP<br>QQT<br>VAPQ<br>QQR            | 0.000±0.00 | 10.133±0.20 | 1.09068 x10 <sup>-7</sup> | 13.31 |
| 265 | P40937 | RFC5      | Replication factor C subunit 5                        | EFGSM<br>VLELN<br>AS<br>DDR            | 0.000±0.00 | 10.132±0.40 | 1.68258 x10 <sup>-6</sup> | 13.31 |
| 266 | Q8WXF0 | SRSF12    | Serine/arginine-rich splicing factor 12               | GFAYV<br>QFED<br>VRD<br>AEDAL<br>YNLNR | 0.000±0.00 | 10.111±0.50 | 3.95451 x10 <sup>-6</sup> | 13.30 |
| 267 | Q6FHJ7 | SFRP4     | Secreted frizzled-related protein 4                   | LSPDRCK                                | 0.000±0.00 | 10.094±0.88 | 3.82492 x10 <sup>-5</sup> | 13.30 |
| 268 | Q16527 | CSRP2     | Cysteine and glycine-rich protein 2                   | IIGAG<br>K<br>P<br>WHK<br>NCF<br>RCAK  | 0.000±0.00 | 10.152±1.77 | 5.745 x10 <sup>-4</sup>   | 13.30 |
| 269 | Q86SG2 | ANKRD23   | Ankyrin repeat domain-containing protein 23           | MDFISI<br>QQL<br>VSGE                  | 0.000±0.00 | 10.077±0.89 | 4.05996 x10 <sup>-5</sup> | 13.29 |

|     |        |          |                                                                                                              |                              |            |             |                           |       |  |
|-----|--------|----------|--------------------------------------------------------------------------------------------------------------|------------------------------|------------|-------------|---------------------------|-------|--|
|     |        |          |                                                                                                              | R                            |            |             |                           |       |  |
| 270 | Q9UQM7 | CAMK2A   | Calcium/calmodulin-dependent protein kinase type II subunit alpha                                            | ITAAEALK                     | 0.000±0.00 | 10.131±1.60 | 3.89908 x10 <sup>-4</sup> | 13.29 |  |
| 271 | Q8IV01 | SYT12    | Synaptotagmin-12                                                                                             | LWTSGSFPSPSPFP<br>NYDYRYLQQK | 0.000±0.00 | 10.044±0.26 | 2.85646 x10 <sup>-7</sup> | 13.29 |  |
| 272 | Q27J81 | INF2     | Inverted formin-2                                                                                            | AFTEERAK                     | 0.000±0.00 | 10.085±1.16 | 1.15213 x10 <sup>-4</sup> | 13.29 |  |
| 273 | Q9H361 | PABPC3   | Polyadenylate-binding protein 3                                                                              | AVDEMNGKELNG<br>K            | 0.000±0.00 | 10.033±0.53 | 5.34431 x10 <sup>-6</sup> | 13.29 |  |
| 274 | Q8N1F8 | STK11IP  | Serine/threonine-protein kinase 11-interacting protein                                                       | EPWEELFSIGLR                 | 0.000±0.00 | 10.063±1.15 | 1.11956 x10 <sup>-4</sup> | 13.29 |  |
| 275 | P55075 | FGF8     | Fibroblast growth factor 8                                                                                   | LIVETDTFGSRVR                | 0.000±0.00 | 10.023±0.66 | 1.22418 x10 <sup>-5</sup> | 13.29 |  |
| 276 | O95671 | ASMTL    | Probable bifunctional dTTP/UTP pyrophosphatase/methyltransferase protein [Includes: dTTP/UTP pyrophosphatase | AEDLFQDAYYS<br>PETRLR        | 0.000±0.00 | 9.993±0.28  | 4.29734 x10 <sup>-7</sup> | 13.29 |  |
| 277 | Q9Y600 | CSAD     | Cysteine sulfinic acid decarboxylase                                                                         | EPEELKQLLDLEL<br>R           | 0.000±0.00 | 9.928±0.74  | 2.02262 x10 <sup>-5</sup> | 13.27 |  |
| 278 | Q9NYM4 | GPR83    | G-protein coupled receptor 83                                                                                | VAWTEKNDGQR                  | 0.000±0.00 | 9.927±0.88  | 4.00819 x10 <sup>-5</sup> | 13.27 |  |
| 279 | Q9UQ03 | CORO2B   | Coronin-2B                                                                                                   | LKEELAQK                     | 0.000±0.00 | 9.963±1.50  | 3.26609 x10 <sup>-4</sup> | 13.27 |  |
| 280 | Q9HIR3 | MYLK2    | Myosin light chain kinase 2, skeletal/cardiac muscle                                                         | EALGGGK                      | 0.000±0.00 | 9.883±0.67  | 1.3955 x10 <sup>-5</sup>  | 13.27 |  |
| 281 | Q86UD4 | ZNF329   | Zinc finger protein 329                                                                                      | AFRDGSYLTQHE<br>R            | 0.000±0.00 | 9.890±0.81  | 2.8881 x10 <sup>-5</sup>  | 13.27 |  |
| 282 | Q8NH61 | OR51F2   | Olfactory receptor 51F2                                                                                      | YTTILTNRARIAK                | 0.000±0.00 | 9.813±0.08  | 2.82068 x10 <sup>-9</sup> | 13.26 |  |
| 283 | Q7Z5R6 | APBB1IP  | Amyloid beta A4 precursor protein-binding family B member 1-interacting protein                              | LALEKLKEAK                   | 0.000±0.00 | 9.620±0.49  | 4.55374 x10 <sup>-6</sup> | 13.23 |  |
| 284 | Q96PQ1 | SIGLEC12 | Sialic acid-binding Ig-like lectin 12                                                                        | AGDHVSR                      | 0.000±0.00 | 9.640±0.94  | 5.99791 x10 <sup>-5</sup> | 13.23 |  |
| 285 | Q9UJA3 | MCM8     | DNA helicase MCM8                                                                                            | LNSSPITTRQLESL<br>IR         | 0.000±0.00 | 9.581±0.11  | 1.07408 x10 <sup>-8</sup> | 13.23 |  |
| 286 | Q9Y5H9 | PCDHA2   | Protocadherin alpha-2                                                                                        | ASSIRRGR                     | 0.000±0.00 | 9.511±0.31  | 7.14855 x10 <sup>-7</sup> | 13.21 |  |
| 287 | P41208 | CETN2    | Centrin-2                                                                                                    | ALGFEPK                      | 0.000±0.00 | 9.433±0.69  | 1.86574 x10 <sup>-5</sup> | 13.20 |  |
| 288 | Q8IW40 | CCDC103  | Coiled-coil domain-containing protein 103                                                                    | DWRRHLPSGPER                 | 0.000±0.00 | 9.394±0.33  | 1.0543 x10 <sup>-6</sup>  | 13.20 |  |
| 289 | O95813 | CER1     | Cerberus                                                                                                     | EEAKKFVHHFMMF<br>R           | 0.000±0.00 | 9.385±0.90  | 5.43881 x10 <sup>-5</sup> | 13.19 |  |
| 290 | Q9UBG0 | MRC2     | C-type mannose receptor 2                                                                                    | DQPGYSR                      | 0.000±0.00 | 9.340±0.20  | 1.50974 x10 <sup>-7</sup> | 13.19 |  |
| 291 | P78536 | ADAM17   | Disintegrin and metalloproteinase domain-containing protein 17                                               | EGVQCSDRNSPCC<br>K           | 0.000±0.00 | 9.267±0.67  | 1.75768 x10 <sup>-5</sup> | 13.18 |  |
| 292 | Q96P50 | ACAP3    | Arf-GAP with coiled-coil, ANK repeat and PH domain-containing protein 3                                      | APLHHATLLGR                  | 0.000±0.00 | 9.121±0.25  | 3.63136 x10 <sup>-7</sup> | 13.15 |  |
| 293 | P50897 | PPT1     | Palmitoyl-protein thioesterase 1                                                                             | EDVYRNHSIFLAD                | 0.000±0.00 | 9.103±1.32  | 2.80341 x10 <sup>-4</sup> | 13.14 |  |

|     |        |          |                                                                  |                                         |             |             |                           |       |  |
|-----|--------|----------|------------------------------------------------------------------|-----------------------------------------|-------------|-------------|---------------------------|-------|--|
|     |        |          |                                                                  | INQR                                    |             |             |                           |       |  |
| 294 | Q14164 | IKBKE    | Inhibitor of nuclear factor kappa-B kinase subunit epsilon       | CWGFDQFFAETS<br>DILQR                   | 3.208±5.55  | 15.553±4.06 | 3.59006x10 <sup>-2</sup>  | 9.48  |  |
| 295 | Q96Q05 | TRAPPC9  | Trafficking protein particle complex subunit 9                   | GQFANPK                                 | 3.195±5.53  | 14.727±4.34 | 4.67791x10 <sup>-2</sup>  | 9.39  |  |
| 296 | Q12774 | ARHGEF5  | Rho guanine nucleotide exchange factor 5                         | ATLSNQEHQWLF<br>SR                      | 2.906±5.03  | 13.173±1.54 | 2.78038 x10 <sup>-2</sup> | 9.32  |  |
| 297 | Q6QEF8 | CORO6    | Coronin-6                                                        | ALRERVQAQEQR                            | 3.581±6.20  | 14.110±2.14 | 4.98259 x10 <sup>-2</sup> | 9.31  |  |
| 298 | Q52LJ0 | FAM98B   | Protein FAM98B                                                   | GPLLEEQALTK                             | 3.094±5.36  | 13.531±3.44 | 4.68950 x10 <sup>-2</sup> | 9.30  |  |
| 299 | Q9HCU5 | PREB     | Prolactin regulatory element-binding protein                     | CGAETQHEGLEL<br>R                       | 3.008±5.21  | 12.998±0.08 | 2.93400 x10 <sup>-2</sup> | 9.29  |  |
| 300 | Q9BYV9 | BACH2    | Transcription regulator protein BACH2                            | CEQSYGTNSSDES<br>GSFSEADSESCPV<br>QDR   | 3.040±5.26  | 13.026±1.05 | 3.22311 x10 <sup>-2</sup> | 9.28  |  |
| 301 | Q86SF2 | GALNT7   | N-acetylgalactosaminyltransferase 7                              | EWQYFKNLHR                              | 3.656±6.33  | 13.808±0.13 | 4.99634 x10 <sup>-2</sup> | 9.28  |  |
| 302 | Q7Z628 | NET1     | Neuroepithelial cell-transforming gene 1 protein                 | IGEATKPDGTVEQ<br>IGHILVSWLPR            | 3.435±5.95  | 13.619±2.23 | 4.99359 x10 <sup>-2</sup> | 9.28  |  |
| 303 | Q9NUL3 | STAU2    | Double-stranded RNA-binding protein Staufen homolog 2            | HKVISGTTLGYLS<br>PK                     | 3.270±5.66  | 13.039±1.40 | 4.40931 x10 <sup>-2</sup> | 9.25  |  |
| 304 | Q96AE7 | TTC17    | Tetratricopeptide repeat protein 17                              | GPQDGVARSSCY<br>GDCRSEDDEATE<br>WITFQVK | 3.055±5.29  | 12.560±1.22 | 3.86981 x10 <sup>-2</sup> | 9.22  |  |
| 305 | Q9BVN2 | RUSC1    | AP-4 complex accessory subunit RUSC1                             | AVSPAAGEEAPA<br>AKEPGAQAGLEV<br>R       | 3.191±5.52  | 12.392±1.35 | 4.87102 x10 <sup>-2</sup> | 9.18  |  |
| 306 | P55157 | MTTP     | Microsomal triglyceride transfer protein large subunit           | AVVEAKKLILGGL<br>EK                     | 2.932±5.08  | 12.004±0.55 | 3.70129 x10 <sup>-2</sup> | 9.18  |  |
| 307 | Q96M27 | PRRC1    | Protein PRRC1                                                    | GAQERIDSLR                              | 3.075±5.32  | 11.991±1.12 | 4.69542 x10 <sup>-2</sup> | 9.16  |  |
| 308 | P31483 | TIA1     | Cytotoxic granule associated RNA binding protein TIA1            | DTSSSTVVSTQR                            | 3.017±5.22  | 11.702±0.38 | 4.53717 x10 <sup>-2</sup> | 9.13  |  |
| 309 | Q8WVR3 | TRAPPC14 | Trafficking protein particle complex subunit 14                  | DLVERHQASLGR                            | 2.653±4.59  | 11.119±0.11 | 3.31480 x10 <sup>-2</sup> | 9.12  |  |
| 310 | O75173 | ADAMTS4  | A disintegrin and metalloproteinase with thrombospondin motifs 4 | MSQTGSHPGRGL<br>AGR                     | 2.825±4.89  | 10.866±0.95 | 4.90619 x10 <sup>-2</sup> | 9.05  |  |
| 311 | Q96C92 | ENTR1    | Endosome-associated-trafficking regulator 1                      | ISEVKDEEEDS                             | 15.738±0.03 | 6.239±5.40  | 3.82385 x10 <sup>-2</sup> | -5.15 |  |
| 312 | Q9Y5L3 | ENTPD2   | Ectonucleoside triphosphate diphosphohydrolase 2                 | SLLPLLLLAAAGL<br>AGLLLLCVPTR            | 11.196±0.98 | 2.903±5.03  | 4.86206 x10 <sup>-2</sup> | -9.08 |  |
| 313 | Q96M29 | TEKT5    | Tektin-5                                                         | CCQEQMR                                 | 11.402±0.95 | 2.972±5.15  | 4.93402 x10 <sup>-2</sup> | -9.10 |  |
| 314 | Q9BU76 | MMTAG2   | Multiple myeloma tumor-associated protein 2                      | APCAGPSR                                | 10.983±1.5  | 2.551±4.42  | 3.52266 x10 <sup>-2</sup> | -9.11 |  |

|     |        |          |                                                                               |                               |                 |            |                           |       |
|-----|--------|----------|-------------------------------------------------------------------------------|-------------------------------|-----------------|------------|---------------------------|-------|
|     |        |          |                                                                               |                               | 1               |            |                           |       |
| 315 | Q9UPR6 | ZFR2     | Zinc finger RNA-binding protein 2                                             | EDVTASAQHALLR<br>MLAFRQTHK    | 11.562±0.4<br>8 | 3.017±5.22 | 4.77830 x10 <sup>-2</sup> | -9.12 |
| 316 | Q08AG5 | ZNF844   | Zinc finger protein 844                                                       | ALSYLNFRHMK<br>MHTR           | 11.696±0.5<br>2 | 2.943±5.10 | 4.15491 x10 <sup>-2</sup> | -9.14 |
| 317 | O75899 | GABBR2   | Gamma-aminobutyric acid type B receptor subunit<br>2                          | AMETLHASSR                    | 12.013±0.3<br>1 | 3.145±5.45 | 4.80184 x10 <sup>-2</sup> | -9.15 |
| 318 | Q9NPY3 | CD93     | Complement component C1q receptor                                             | DETQSHYFLCKEK                 | 11.952±1.3<br>6 | 3.042±5.27 | 4.70015 x10 <sup>-2</sup> | -9.15 |
| 319 | Q58EX7 | PLEKHG4  | Puratrophin-1                                                                 | ALAQRCQR                      | 12.307±0.2<br>5 | 3.250±5.63 | 4.95922 x10 <sup>-2</sup> | -9.17 |
| 320 | Q8IVF5 | TIAM2    | Rho guanine nucleotide exchange factor TIAM2                                  | AFVEDTAK                      | 12.179±0.7<br>5 | 3.100±5.37 | 4.40813 x10 <sup>-2</sup> | -9.18 |
| 321 | Q9Y4F4 | TOGARAM1 | TOG array regulator of axonemal microtubules<br>protein 1                     | AMVNNVTPAR                    | 12.222±1.3<br>4 | 2.92±5.06  | 3.69128 x10 <sup>-2</sup> | -9.21 |
| 322 | Q04695 | KRT17    | Keratin, type I cytoskeletal 17                                               | ALEEANTELEVK                  | 12.689±0.2<br>3 | 3.280±5.68 | 4.56034 x10 <sup>-2</sup> | -9.21 |
| 323 | P63162 | SNRPN    | Small nuclear ribonucleoprotein-associated protein<br>N                       | GTPIGMPPPGMRP<br>PPPGIR       | 12.398±0.0<br>4 | 3.042±5.27 | 3.70513 x10 <sup>-2</sup> | -9.21 |
| 324 | Q8NCL4 | GALNT6   | Polypeptide N-acetylgalactosaminyltransferase 6                               | EEATEKPWLK                    | 12.709±1.5<br>3 | 3.217±5.57 | 4.66160 x10 <sup>-2</sup> | -9.21 |
| 325 | P98198 | ATP8B2   | Phospholipid-transporting ATPase ID                                           | AVTLAIGDGAND<br>VSMIK         | 12.554±0.5<br>3 | 3.026±5.24 | 3.50306 x10 <sup>-2</sup> | -9.23 |
| 326 | A1IGU5 | ARHGEF37 | Rho guanine nucleotide exchange factor 37                                     | DLAKQVLQR                     | 12.848±0.0<br>3 | 3.188±5.52 | 3.87398 x10 <sup>-2</sup> | -9.24 |
| 327 | Q9HC62 | SEN2     | Sentrin-specific protease 2                                                   | DKPITFTQHQMPL<br>FR           | 12.684±0.5<br>4 | 3.032±5.25 | 3.39388 x10 <sup>-2</sup> | -9.25 |
| 328 | P10244 | MYBL2    | Myb-related protein B                                                         | QWTLIAKHLK                    | 13.088±1.2<br>4 | 3.307±5.73 | 4.44837 x10 <sup>-2</sup> | -9.25 |
| 329 | P17927 | CR1      | Complement receptor type 1                                                    | APICEIISCEPPPTIS<br>NGDFYSNNR | 13.217±0.8<br>6 | 3.415±5.91 | 4.68066 x10 <sup>-2</sup> | -9.25 |
| 330 | Q6WRX3 | ZYG11A   | Protein zyg-11 homolog A                                                      | FVMRWLCK                      | 13.025±0.3<br>2 | 3.270±5.66 | 4.07762 x10 <sup>-2</sup> | -9.25 |
| 331 | Q8NB46 | ANKRD52  | Serine/threonine-protein phosphatase 6 regulatory<br>ankyrin repeat subunit C | DTLWLTPLHR                    | 13.277±1.4<br>9 | 3.351±5.80 | 4.54794 x10 <sup>-2</sup> | -9.26 |
| 332 | Q15080 | NCF4     | Neutrophil cytosol factor 4                                                   | DIAVEEDLSSTPLL<br>K           | 12.855±1.2<br>9 | 3.050±5.28 | 3.53866 x10 <sup>-2</sup> | -9.26 |
| 333 | O75127 | PTCD1    | Pentatricopeptide repeat-containing protein 1,<br>mitochondrial               | DGLQLLTDK                     | 13.401±0.8<br>4 | 3.347±5.80 | 4.10049 x10 <sup>-2</sup> | -9.28 |

|     |        |            |                                                       |                               |                 |            |                            |        |
|-----|--------|------------|-------------------------------------------------------|-------------------------------|-----------------|------------|----------------------------|--------|
| 334 | Q9BW27 | NUP85      | Nuclear pore complex protein Nup85                    | EFHRMYGEKR                    | 13.175±0.7<br>5 | 3.143±5.44 | 3.40978 x10 <sup>-2</sup>  | -9.28  |
| 335 | P07288 | KLK3       | Prostate-specific antigen                             | DTIVANP                       | 12.650±2.3<br>4 | 2.664±4.61 | 2.87048 x10 <sup>-2</sup>  | -9.29  |
| 336 | Q9NXH9 | TRMT1      | tRNA (guanine(26)-N(2))-dimethyltransferase           | FALEVPGLR                     | 13.185±0.5<br>4 | 3.117±5.4  | 3.24046 x10 <sup>-2</sup>  | -9.29  |
| 337 | Q96R84 | OR1F2P     | Putative olfactory receptor 1F2                       | DIAAAVR                       | 13.751±1.2<br>7 | 3.477±6.02 | 4.44466 x10 <sup>-2</sup>  | -9.29  |
| 338 | P52756 | RBM5       | RNA-binding protein 5                                 | AAERREK                       | 14.186±0.1<br>1 | 3.714±6.43 | 4.78181 x10 <sup>-2</sup>  | -9.31  |
| 339 | Q9UIW2 | PLXNA1     | Plexin-A1                                             | GVPYSQRPK                     | 13.527±1.3<br>7 | 3.158±5.47 | 3.33285 x10 <sup>-2</sup>  | -9.32  |
| 340 | Q8IZF0 | NALCN      | NALCN                                                 | CLRPLRIFK                     | 13.866±1.0<br>5 | 3.390±5.87 | 3.82734 x10 <sup>-2</sup>  | -9.32  |
| 341 | P29965 | CD40LG     | CD40 ligand                                           | DIMLNKEETK                    | 14.087±0.4<br>6 | 3.568±6.18 | 4.23659 x10 <sup>-2</sup>  | -9.32  |
| 342 | Q8N715 | CCDC185    | Coiled-coil domain-containing protein 185             | AEKEEKCHIEGIK                 | 13.882±0.5<br>9 | 3.304±5.72 | 3.33417 x10 <sup>-2</sup>  | -9.34  |
| 343 | O94913 | PCF11      | Pcf11                                                 | ASGHYFDEK                     | 14.360±2.5<br>2 | 3.502±6.06 | 4.57183 x10 <sup>-2</sup>  | -9.34  |
| 344 | Q9P2F6 | ARHGAP20   | Rho GTPase-activating protein 20                      | DIGNCAYSK                     | 14.069±0.6<br>0 | 3.234±5.60 | 2.90347 x10 <sup>-2</sup>  | -9.36  |
| 345 | P49703 | ARL4D      | ADP-ribosylation factor-like protein 4D               | QDQPGALSAAEV<br>EK            | 14.398±0.1<br>5 | 3.334±5.77 | 2.94133 x10 <sup>-2</sup>  | -9.38  |
| 346 | Q68CP9 | ARID2      | AT-rich interactive domain-containing protein 2       | DIVDDNEVRDLIS<br>DRNK         | 14.507±2.3<br>2 | 3.260±5.65 | 3.31580 x10 <sup>-2</sup>  | -9.39  |
| 347 | Q9Y5Z7 | HCFC2      | Host cell factor 2                                    | GYGPATQVR                     | 15.910±4.8<br>4 | 3.084±5.34 | 3.68068 x10 <sup>-2</sup>  | -9.52  |
| 348 | Q96HQ2 | CDKN2AIPNL | CDKN2AIP N-terminal-like protein                      | MVGGEAAAVERE<br>LVSGVR        | 8.904±0.07      | 0.000±0.00 | 2.56394 x10 <sup>-9</sup>  | -13.12 |
| 349 | Q96HR8 | NAF1       | H/ACA ribonucleoprotein complex non-core subunit NAF1 | MEVVEAAAAQLE<br>TLK           | 9.036±0.12      | 0.000±0.00 | 2.33906 x10 <sup>-8</sup>  | -13.14 |
| 350 | Q96T53 | MBOAT4     | Ghrelin O-acyltransferase                             | AASGGFR                       | 9.085±0.05      | 0.000±0.00 | 7.71344 x10 <sup>-10</sup> | -13.15 |
| 351 | Q9BY32 | ITPA       | Inosine triphosphate pyrophosphatase                  | AEKNAVSHR                     | 9.235±0.11      | 0.000±0.00 | 1.43214 x10 <sup>-8</sup>  | -13.17 |
| 352 | Q8NG41 | NPB        | Neuropeptide B                                        | ANVFLSLRAADC<br>LAA           | 9.239±0.11      | 0.000±0.00 | 1.15229 x10 <sup>-8</sup>  | -13.17 |
| 353 | O95994 | AGR2       | Anterior gradient protein 2 homolog                   | LPQTLSRGWGDQ<br>LIWTQTYEEALYK | 9.318±0.18      | 0.000±0.00 | 8.58505 x10 <sup>-8</sup>  | -13.19 |

|     |        |           |                                                              |                             |                 |            |                           |        |
|-----|--------|-----------|--------------------------------------------------------------|-----------------------------|-----------------|------------|---------------------------|--------|
| 354 | Q9Y2B4 | TP53TG5   | TP53-target gene 5 protein                                   | LRTVLKLNLSLLK               | 9.347±0.72      | 0.000±0.00 | 2.33443 x10 <sup>-5</sup> | -13.19 |
| 355 | Q5H9R7 | PPP6R3    | Serine/threonine-protein phosphatase 6 regulatory subunit 3  | DLPDEVR                     | 9.404±0.76      | 0.000±0.00 | 2.83523 x10 <sup>-5</sup> | -13.20 |
| 356 | Q8N0U8 | VKORC1L1  | Vitamin K epoxide reductase complex subunit 1-like protein 1 | GFGLLGSIK                   | 9.495±0.10      | 0.000±0.00 | 8.11627 x10 <sup>-9</sup> | -13.21 |
| 357 | Q8N5J2 | MINDY1    | Ubiquitin carboxyl-terminal hydrolase MINDY-1                | SEGLQLNFQQNV<br>DDAMTVLPK   | 9.542±0.30      | 0.000±0.00 | 6.17721 x10 <sup>-7</sup> | -13.22 |
| 358 | P52758 | RIDA      | 2-iminobutanoate/2-iminopropanoate deaminase                 | AAGCDFTNVVK                 | 9.626±0.53      | 0.000±0.00 | 6.07263 x10 <sup>-6</sup> | -13.23 |
| 359 | Q14139 | UBE4A     | Ubiquitin conjugation factor E4 A                            | IQRWLAER                    | 9.654±0.49      | 0.000±0.00 | 4.4489 x10 <sup>-6</sup>  | -13.24 |
| 360 | P22736 | NR4A1     | Nuclear receptor subfamily 4 group A member 1                | IFMDTLPF                    | 9.719±0.92      | 0.000±0.00 | 5.30999 x10 <sup>-5</sup> | -13.24 |
| 361 | O14717 | TRDMT1    | tRNA (cytosine(38)-C(5))-methyltransferase                   | LQSEPLPFQAPGQ<br>VLMEFPK    | 9.712±0.52      | 0.000±0.00 | 5.55236 x10 <sup>-6</sup> | -13.24 |
| 362 | Q8IYB0 | n/a       | Putative uncharacterized protein MGC39545                    | ACNNYQYGYLAK<br>PDTSFVWIKCR | 9.753±0.80      | 0.000±0.00 | 3.01227 x10 <sup>-5</sup> | -13.25 |
| 363 | Q6PIF2 | SYCE2     | Synaptonemal complex central element protein 2               | IIQEKLQEFTQKM<br>AK         | 9.748±0.35      | 0.000±0.00 | 1.10565 x10 <sup>-6</sup> | -13.25 |
| 364 | Q9UBY0 | SLC9A2    | Sodium/hydrogen exchanger 2                                  | KVTSSETDEIR                 | 9.798±0.75      | 0.000±0.00 | 2.21417 x10 <sup>-5</sup> | -13.26 |
| 365 | Q8N137 | CNTROB    | Centrobilin                                                  | DALQLEMSLVQA<br>RYESQR      | 9.824±0.64      | 0.000±0.00 | 1.1876 x10 <sup>-5</sup>  | -13.26 |
| 366 | P04432 | IGKV1D-39 | Immunoglobulin kappa variable 1D-39                          | ASQSISSYLNWYQ<br>QKPGK      | 9.838±0.25      | 0.000±0.00 | 2.6198 x10 <sup>-7</sup>  | -13.26 |
| 367 | Q8NFX0 | BEST4     | Bestrophin-4                                                 | FPTMEHVVDAGF<br>MSQEERK     | 9.900±0.37      | 0.000±0.00 | 1.26102 x10 <sup>-6</sup> | -13.27 |
| 368 | Q8N371 | KDM8      | Bifunctional peptidase and arginyl-hydroxylase JMJD5         | ALDLSFSVSFWW<br>S           | 9.919±0.72      | 0.000±0.00 | 1.85597 x10 <sup>-5</sup> | -13.27 |
| 369 | Q14651 | PLS1      | Plastin-1                                                    | AGLMLQEADKLG<br>CK          | 9.950±1.08      | 0.000±0.00 | 8.98464 x10 <sup>-5</sup> | -13.27 |
| 370 | O60925 | PFDN1     | Prefoldin subunit 1                                          | AAPVDLELK                   | 9.980±1.09      | 0.000±0.00 | 9.12824 x10 <sup>-5</sup> | -13.28 |
| 371 | Q2VWA4 | SKOR2     | SKI family transcriptional corepressor 2                     | AGLSGLFWPAGR                | 9.968±0.57      | 0.000±0.00 | 7.06558 x10 <sup>-6</sup> | -13.28 |
| 372 | Q13487 | SNAPC2    | snRNA-activating protein complex subunit 2                   | YLSSVSR                     | 9.983±0.45      | 0.000±0.00 | 2.6368 x10 <sup>-6</sup>  | -13.28 |
| 373 | P78317 | RNF4      | E3 ubiquitin-protein ligase RNF4                             | DVYVTTHTPRNA<br>R           | 9.993±0.71      | 0.000±0.00 | 1.67523 x10 <sup>-5</sup> | -13.28 |
| 374 | Q8IX30 | SCUBE3    | Signal peptide, CUB and EGF-like domain-containing protein 3 | AEETTASGLPCL<br>R           | 10.037±1.1<br>1 | 0.000±0.00 | 9.84422 x10 <sup>-5</sup> | -13.29 |
| 375 | Q14197 | MRPL58    | Peptidyl-tRNA hydrolase ICT1, mitochondrial                  | CLRWGLSR                    | 10.109±1.4<br>5 | 0.000±0.00 | 2.73346 x10 <sup>-4</sup> | -13.29 |
| 376 | Q9BXR6 | CFHR5     | Complement factor H-related protein 5                        | ESYKVGDVVK                  | 10.084±1.1<br>4 | 0.000±0.00 | 1.05648 x10 <sup>-4</sup> | -13.29 |
| 377 | O00204 | SULT2B1   | Sulfotransferase 2B1                                         | GVCGDWK                     | 10.052±0.5      | 0.000±0.00 | 3.90537 x10 <sup>-6</sup> | -13.29 |

|     |        |         |                                                                      |                         |             |            |                           |        |
|-----|--------|---------|----------------------------------------------------------------------|-------------------------|-------------|------------|---------------------------|--------|
|     |        |         |                                                                      |                         | 0           |            |                           |        |
| 378 | Q8IXQ9 | ETFBKMT | Electron transfer flavoprotein beta subunit lysine methyltransferase | CKFWWER                 | 10.054±0.52 | 0.000±0.00 | 4.61485 x10 <sup>-6</sup> | -13.29 |
| 379 | Q96JY0 | MAEL    | Protein maelstrom homolog                                            | EWRAAQGKDPGPSEK         | 10.086±0.29 | 0.000±0.00 | 4.52543 x10 <sup>-7</sup> | -13.30 |
| 380 | Q15059 | BRD3    | Bromodomain-containing protein 3                                     | KAKVAPPAK               | 10.102±0.35 | 0.000±0.00 | 9.54039 x10 <sup>-7</sup> | -13.30 |
| 381 | Q9P031 | CCDC59  | Thyroid transcription factor 1-associated protein 26                 | GEGVSTVGYRNK            | 10.205±1.31 | 0.000±0.00 | 1.74408 x10 <sup>-4</sup> | -13.31 |
| 382 | P17027 | ZNF23   | Zinc finger protein 23                                               | AFSVNGK                 | 10.167±0.67 | 0.000±0.00 | 1.26672 x10 <sup>-5</sup> | -13.31 |
| 383 | Q15760 | GPR19   | Probable G-protein coupled receptor 19                               | FYTIVYPLSFK             | 10.162±0.09 | 0.000±0.00 | 3.70089 x10 <sup>-9</sup> | -13.31 |
| 384 | Q9Y371 | SH3GLB1 | Endophilin-B1                                                        | IMKQTEVLLQPNPNAR        | 10.233±0.76 | 0.000±0.00 | 1.9861 x10 <sup>-5</sup>  | -13.32 |
| 385 | Q9C0E2 | XPO4    | Exportin-4                                                           | ANLVIQCENWWNLAK         | 10.305±1.50 | 0.000±0.00 | 2.87675 x10 <sup>-4</sup> | -13.32 |
| 386 | Q9P0L9 | PKD2L1  | Polycystic kidney disease 2-like 1 protein                           | EDILSCYDVYSPDK          | 10.314±1.44 | 0.000±0.00 | 2.44776 x10 <sup>-4</sup> | -13.32 |
| 387 | P06681 | C2      | Complement C2                                                        | FGHGDKVR                | 10.269±0.65 | 0.000±0.00 | 1.04648 x10 <sup>-5</sup> | -13.32 |
| 388 | Q9H6B9 | EPHX3   | Epoxide hydrolase 3                                                  | EFQSRFHVVAVDLRGYGPSDAPR | 10.300±0.49 | 0.000±0.00 | 3.45664 x10 <sup>-6</sup> | -13.33 |
| 389 | Q8WX77 | IGFBPL1 | Insulin-like growth factor-binding protein-like 1                    | GGPSDHEATAWILINPLR      | 10.424±1.94 | 0.000±0.00 | 7.48771 x10 <sup>-4</sup> | -13.33 |
| 390 | Q13615 | MTMR3   | Myotubularin-related protein 3                                       | ELESVSSFRSWK            | 10.363±1.28 | 0.000±0.00 | 1.51411 x10 <sup>-4</sup> | -13.33 |
| 391 | O95716 | RAB3D   | Ras-related protein Rab-3D                                           | ASAGDTQAGPR             | 10.326±0.58 | 0.000±0.00 | 6.3765 x10 <sup>-6</sup>  | -13.33 |
| 392 | Q9NPB8 | GPCPD1  | Glycerophosphocholine phosphodiesterase GPCPD1                       | DFVPPVYHDLTCCLTMK       | 10.386±1.45 | 0.000±0.00 | 2.42843 x10 <sup>-4</sup> | -13.33 |
| 393 | Q15648 | MED1    | Mediator of RNA polymerase II transcription subunit 1                | MAIMYWK                 | 10.398±0.82 | 0.000±0.00 | 2.5844 x10 <sup>-5</sup>  | -13.34 |
| 394 | P28908 | TNFRSF8 | Tumor necrosis factor receptor superfamily member 8                  | DLPEPRVSTEHTNNK         | 10.406±0.73 | 0.000±0.00 | 1.55822 x10 <sup>-5</sup> | -13.34 |
| 395 | Q8TCT7 | SPPL2B  | Signal peptide peptidase-like 2B                                     | AALYAPK                 | 10.395±0.22 | 0.000±0.00 | 1.2614 x10 <sup>-7</sup>  | -13.34 |
| 396 | P24588 | AKAP5   | A-kinase anchor protein 5                                            | EKASMLCFK               | 10.506±1.86 | 0.000±0.00 | 6.14007 x10 <sup>-4</sup> | -13.34 |

|     |        |           |                                                       |                                     |                 |            |                           |        |
|-----|--------|-----------|-------------------------------------------------------|-------------------------------------|-----------------|------------|---------------------------|--------|
| 397 | Q8IYW5 | RNF168    | E3 ubiquitin-protein ligase RNF168                    | DIDSSDRK                            | 10.406±0.4<br>9 | 0.000±0.00 | 3.39241 x10 <sup>-6</sup> | -13.34 |
| 398 | Q6JQN1 | ACAD10    | Acyl-CoA dehydrogenase family member 10               | EFGRLCSEMLK                         | 10.424±0.8<br>3 | 0.000±0.00 | 2.62105 x10 <sup>-5</sup> | -13.34 |
| 399 | P59047 | NLRP5     | NACHT, LRR and PYD domains-containing protein 5       | EEDVRMACEALK                        | 10.424±0.6<br>1 | 0.000±0.00 | 7.67113 x10 <sup>-6</sup> | -13.35 |
| 400 | Q9UDY4 | DNAJB4    | DnaJ homolog subfamily B member 4                     | FHPDKNK                             | 10.435±0.4<br>4 | 0.000±0.00 | 2.01679 x10 <sup>-6</sup> | -13.35 |
| 401 | Q8IWS0 | PHF6      | PHD finger protein 6                                  | CMLFSSALVSSH<br>DNESLGGFSIEDV<br>QK | 10.494±1.1<br>9 | 0.000±0.00 | 1.0744 x10 <sup>-4</sup>  | -13.35 |
| 402 | Q9HA72 | CALHM2    | Calcium homeostasis modulator protein 2               | ANEDQLFQRTAE<br>VHSR                | 10.470±0.7<br>4 | 0.000±0.00 | 1.64442 x10 <sup>-5</sup> | -13.35 |
| 403 | Q5NUL3 | FFAR4     | Free fatty acid receptor 4                            | FPFSDVKGDHR                         | 10.482±0.9<br>5 | 0.000±0.00 | 4.33653 x10 <sup>-5</sup> | -13.35 |
| 404 | P23443 | RPS6KB1   | Ribosomal protein S6 kinase beta-1                    | CKLNLPPYLTQEA<br>RDLLK              | 10.586±2.1<br>0 | 0.000±0.00 | 9.42818 x10 <sup>-4</sup> | -13.35 |
| 405 | O43447 | PPIH      | Peptidyl-prolyl cis-trans isomerase H                 | AVANSSPVNPVVF<br>FDVSIQQEVGR        | 10.536±1.6<br>0 | 0.000±0.00 | 3.41208 x10 <sup>-4</sup> | -13.35 |
| 406 | P59051 | BRWD1-AS2 | Putative uncharacterized protein encoded by BRWD1-AS2 | ATLPNPRLGAPAV<br>PR                 | 10.631±2.3<br>4 | 0.000±0.00 | 1.41003 x10 <sup>-3</sup> | -13.35 |
| 407 | P19012 | KRT15     | Keratin, type I cytoskeletal 15                       | ALEEANADLEVK                        | 10.494±0.6<br>2 | 0.000±0.00 | 7.84603 x10 <sup>-6</sup> | -13.36 |
| 408 | Q9NRZ5 | AGPAT4    | 1-acyl-sn-glycerol-3-phosphate acyltransferase delta  | GFAITVRSR                           | 10.556±1.5<br>0 | 0.000±0.00 | 2.59926 x10 <sup>-4</sup> | -13.36 |
| 409 | Q9Y2Z4 | YARS2     | Tyrosine--tRNA ligase, mitochondrial                  | EREALETERVR                         | 10.521±0.8<br>4 | 0.000±0.00 | 2.6946 x10 <sup>-5</sup>  | -13.36 |
| 410 | Q6IA86 | ELP2      | Elongator complex protein 2                           | ITSVHSR                             | 10.600±1.4<br>5 | 0.000±0.00 | 2.25173 x10 <sup>-4</sup> | -13.36 |
| 411 | Q9NP70 | AMBN      | Ameloblastin                                          | LGIMSSEEVAGGR                       | 10.567±0.2<br>0 | 0.000±0.00 | 8.62814 x10 <sup>-8</sup> | -13.37 |
| 412 | Q02338 | BDH1      | D-beta-hydroxybutyrate dehydrogenase, mitochondrial   | LPGKTLACDR                          | 10.626±0.1<br>1 | 0.000±0.00 | 8.70703 x10 <sup>-9</sup> | -13.38 |
| 413 | Q9NSD5 | SLC6A13   | Sodium- and chloride-dependent GABA transporter 2     | GVKSTGK                             | 10.630±0.2<br>8 | 0.000±0.00 | 3.31563 x10 <sup>-7</sup> | -13.38 |
| 414 | P81277 | PRLH      | Prolactin-releasing peptide                           | GAASRTHR                            | 10.695±1.4<br>2 | 0.000±0.00 | 1.98485 x10 <sup>-4</sup> | -13.38 |
| 415 | Q96MD2 | KICS2     | KICSTOR subunit 2                                     | FSFYFHEALSR                         | 10.685±1.3<br>1 | 0.000±0.00 | 1.45572 x10 <sup>-4</sup> | -13.38 |

|     |        |         |                                                          |                         |                 |            |                           |        |
|-----|--------|---------|----------------------------------------------------------|-------------------------|-----------------|------------|---------------------------|--------|
| 416 | Q9UK80 | USP21   | Ubiquitin carboxyl-terminal hydrolase 21                 | ILVLHLNRFASASR          | 10.668±0.9<br>0 | 0.000±0.00 | 3.38045 x10 <sup>-5</sup> | -13.38 |
| 417 | Q2M3W8 | ZNF181  | Zinc finger protein 181                                  | LSKGMIPDWESR            | 10.707±1.4<br>3 | 0.000±0.00 | 2.05191 x10 <sup>-4</sup> | -13.38 |
| 418 | Q8NBS3 | SLC4A11 | Solute carrier family 4 member 11                        | DFVPGFK                 | 10.682±0.9<br>1 | 0.000±0.00 | 3.43588 x10 <sup>-5</sup> | -13.38 |
| 419 | Q5T9G4 | ARMC12  | Armadillo repeat-containing protein 12                   | DSGELRRLNSLE<br>CK      | 10.686±0.4<br>0 | 0.000±0.00 | 1.30761 x10 <sup>-6</sup> | -13.38 |
| 420 | Q8IZP9 | ADGRG2  | Adhesion G-protein coupled receptor G2                   | EDSCNGK                 | 10.715±0.7<br>6 | 0.000±0.00 | 1.71094 x10 <sup>-5</sup> | -13.38 |
| 421 | O43316 | PAX4    | Paired box protein Pax-4                                 | GIGGSKPR                | 10.711±0.1<br>7 | 0.000±0.00 | 4.12675 x10 <sup>-8</sup> | -13.39 |
| 422 | Q96PU5 | NEDD4L  | E3 ubiquitin-protein ligase NEDD4-like                   | DIFGASDPYVK             | 10.743±0.4<br>4 | 0.000±0.00 | 1.94049 x10 <sup>-6</sup> | -13.39 |
| 423 | P40938 | RFC3    | Replication factor C subunit 3                           | AIYHLEAFVAK             | 10.768±0.9<br>7 | 0.000±0.00 | 4.30793 x10 <sup>-5</sup> | -13.39 |
| 424 | Q15545 | TAF7    | Transcription initiation factor TFIID subunit 7          | HGIVRVDRVPLAS<br>K      | 10.804±1.4<br>6 | 0.000±0.00 | 2.12139 x10 <sup>-4</sup> | -13.39 |
| 425 | Q9H4A9 | DPEP2   | Dipeptidase 2                                            | AVIGSKFIGIGGD<br>YDGAGK | 10.776±0.6<br>3 | 0.000±0.00 | 7.73511 x10 <sup>-6</sup> | -13.39 |
| 426 | Q3ZCT8 | KBTD12  | Kelch repeat and BTB domain-containing protein 12        | ELAEMIDVVLTAE<br>GEK    | 10.775±0.5<br>0 | 0.000±0.00 | 2.99523 x10 <sup>-6</sup> | -13.39 |
| 427 | O75674 | TOM1L1  | TOM1-like protein 1                                      | EVYLDLVKK               | 10.773±0.1<br>2 | 0.000±0.00 | 9.81747 x10 <sup>-9</sup> | -13.40 |
| 428 | Q9Y2H9 | MAST1   | Microtubule-associated serine/threonine-protein kinase 1 | LISNGAYGAVYL<br>VRHR    | 10.826±1.2<br>5 | 0.000±0.00 | 1.14947 x10 <sup>-4</sup> | -13.40 |
| 429 | Q9NTJ4 | MAN2C1  | Alpha-mannosidase 2C1                                    | AELAVFHR                | 10.825±1.1<br>1 | 0.000±0.00 | 7.0916 x10 <sup>-5</sup>  | -13.40 |
| 430 | P07357 | C8A     | Complement component C8 alpha chain                      | LYYGDDEKYFRK<br>PYNFLK  | 10.817±0.9<br>1 | 0.000±0.00 | 3.34249 x10 <sup>-5</sup> | -13.40 |
| 431 | Q9Y5R5 | DMRT2   | Doublesex- and mab-3-related transcription factor 2      | ELENIMLEREYK            | 10.854±1.3<br>1 | 0.000±0.00 | 1.37892 x10 <sup>-4</sup> | -13.40 |
| 432 | Q96MS3 | GLT1D1  | Glycosyltransferase 1 domain-containing protein 1        | DTYQQLIRKLEGS<br>TED    | 10.892±1.6<br>8 | 0.000±0.00 | 3.56943 x10 <sup>-4</sup> | -13.40 |
| 433 | Q8TBZ3 | WDR20   | WD repeat-containing protein 20                          | ATEGGGK                 | 10.884±1.6<br>0 | 0.000±0.00 | 3.00581 x10 <sup>-4</sup> | -13.40 |
| 434 | P0C645 | OR4E1   | Olfactory receptor 4E1                                   | EEAILLNQTSLV<br>YFRLR   | 10.827±0.6<br>4 | 0.000±0.00 | 8.0662 x10 <sup>-6</sup>  | -13.40 |
| 435 | Q9POS9 | TMEM14C | Transmembrane protein 14C                                | FMPAGLIAGASLL           | 10.822±0.3      | 0.000±0.00 | 9.39578 x10 <sup>-7</sup> | -13.40 |

|     |        |          |                                                  |                          |                 |            |                           |        |
|-----|--------|----------|--------------------------------------------------|--------------------------|-----------------|------------|---------------------------|--------|
|     |        |          |                                                  | MVAK                     | 7               |            |                           |        |
| 436 | P35504 | UGT1A5   | UDP-glucuronosyltransferase 1A5                  | CCAYGYR                  | 10.889±1.5<br>3 | 0.000±0.00 | 2.48011 x10 <sup>-4</sup> | -13.40 |
| 437 | Q9Y6I7 | WSB1     | WD repeat and SOCS box-containing protein 1      | QSRCVNIWHR               | 10.881±1.0<br>7 | 0.000±0.00 | 6.05223 x10 <sup>-5</sup> | -13.40 |
| 438 | Q13530 | SERINC3  | Serine incorporator 3                            | FFISINLILCVVASI<br>ISHPK | 10.858±0.5<br>9 | 0.000±0.00 | 5.64065 x10 <sup>-6</sup> | -13.41 |
| 439 | Q86TI4 | WDR86    | WD repeat-containing protein 86                  | EHRGSVICLELVN<br>R       | 10.929±1.6<br>2 | 0.000±0.00 | 3.04902 x10 <sup>-4</sup> | -13.41 |
| 440 | Q8TF47 | ZFP90    | Zinc finger protein 90 homolog                   | HLGSEASTQKK              | 10.871±0.7<br>5 | 0.000±0.00 | 1.52718 x10 <sup>-5</sup> | -13.41 |
| 441 | Q8NCQ5 | FBXO15   | F-box only protein 15                            | LIRIFCLHPGLLVG<br>VWK    | 10.947±1.5<br>9 | 0.000±0.00 | 2.85238 x10 <sup>-4</sup> | -13.41 |
| 442 | P11474 | ESRRA    | Steroid hormone receptor ERR1                    | AGPGGGAER                | 10.912±0.9<br>9 | 0.000±0.00 | 4.36337 x10 <sup>-5</sup> | -13.41 |
| 443 | Q9NPG8 | ZDHHC4   | ZDHHC4                                           | GGAQIFSCIPECL<br>QR      | 10.904±0.8<br>3 | 0.000±0.00 | 2.18542 x10 <sup>-5</sup> | -13.41 |
| 444 | Q92805 | GOLGA1   | Golgin subfamily A member 1                      | EINFEYLK                 | 10.939±1.3<br>1 | 0.000±0.00 | 1.33726 x10 <sup>-4</sup> | -13.41 |
| 445 | Q7Z6J4 | FGD2     | FYVE, RhoGEF and PH domain-containing protein 2  | CSDYRAELK                | 10.899±0.6<br>8 | 0.000±0.00 | 9.84283 x10 <sup>-6</sup> | -13.41 |
| 446 | O14976 | GAK      | Cyclin-G-associated kinase                       | AMLQVNPEER               | 10.932±1.1<br>3 | 0.000±0.00 | 7.54553 x10 <sup>-5</sup> | -13.41 |
| 447 | Q86XK2 | FBXO11   | F-box only protein 11                            | AVSRGQCLYK               | 10.920±0.8<br>9 | 0.000±0.00 | 2.96244 x10 <sup>-5</sup> | -13.41 |
| 448 | Q8J025 | APCDD1   | Protein APCDD1                                   | LGQQVNR                  | 10.911±0.7<br>0 | 0.000±0.00 | 1.10263 x10 <sup>-5</sup> | -13.41 |
| 449 | Q8WY21 | SORCS1   | VPS10 domain-containing receptor SorCS1          | EQYTAKPQKCPG<br>K        | 10.916±0.2<br>3 | 0.000±0.00 | 1.28117 x10 <sup>-7</sup> | -13.41 |
| 450 | A8MYA2 | CXorf49  | Uncharacterized protein CXorf49                  | AQLPTHRPLPRL<br>SVR      | 11.026±1.4<br>1 | 0.000±0.00 | 1.72642 x10 <sup>-4</sup> | -13.42 |
| 451 | Q99592 | ZBTB18   | Zinc finger and BTB domain-containing protein 18 | ELDREDKASDDE<br>MMTPESER | 10.976±0.4<br>6 | 0.000±0.00 | 1.99183 x10 <sup>-6</sup> | -13.42 |
| 452 | Q9H116 | GZF1     | GDNF-inducible zinc finger protein 1             | EQKTAEGDVG<br>YR         | 10.984±0.6<br>5 | 0.000±0.00 | 7.92669 x10 <sup>-6</sup> | -13.42 |
| 453 | Q5FVE4 | ACSBG2   | Long-chain-fatty-acid--CoA ligase ACSBG2         | AIQQGINAVNQEA<br>MNNAQR  | 10.989±0.4<br>9 | 0.000±0.00 | 2.53302 x10 <sup>-6</sup> | -13.42 |
| 454 | A8MV24 | C17orf98 | Uncharacterized protein C17orf98                 | MAYLSECR                 | 11.027±0.9<br>8 | 0.000±0.00 | 4.01558 x10 <sup>-5</sup> | -13.42 |

|     |        |         |                                                  |                                        |                 |            |                           |        |
|-----|--------|---------|--------------------------------------------------|----------------------------------------|-----------------|------------|---------------------------|--------|
| 455 | Q9H3G5 | CPVL    | Probable serine carboxypeptidase CPVL            | AFDMINRFIYGK                           | 11.035±1.0<br>2 | 0.000±0.00 | 4.80304 x10 <sup>-5</sup> | -13.43 |
| 456 | P55081 | MFAP1   | Microfibrillar-associated protein 1              | AEIERMRNLTEEE<br>R                     | 11.014±0.3<br>7 | 0.000±0.00 | 8.24578 x10 <sup>-7</sup> | -13.43 |
| 457 | Q9NPC6 | MYOZ2   | Myozenin-2                                       | LSHNTMMK                               | 11.082±1.3<br>4 | 0.000±0.00 | 1.39568 x10 <sup>-4</sup> | -13.43 |
| 458 | Q92570 | NR4A3   | Nuclear receptor subfamily 4 group A member 3    | GFGEWLDSIK                             | 11.073±1.1<br>4 | 0.000±0.00 | 7.34765 x10 <sup>-5</sup> | -13.43 |
| 459 | Q92954 | PRG4    | Proteoglycan 4                                   | GVLHNEVKVSIL<br>WRGLPNVVTSAIS<br>LPNIR | 11.072±1.0<br>3 | 0.000±0.00 | 4.82361 x10 <sup>-5</sup> | -13.43 |
| 460 | O75354 | ENTPD6  | Ectonucleoside triphosphate diphosphohydrolase 6 | ELVSPCLSPSFK                           | 11.063±0.7<br>9 | 0.000±0.00 | 1.75712 x10 <sup>-5</sup> | -13.43 |
| 461 | Q8N141 | ZFP82   | Zinc finger protein 82 homolog                   | ECRKAFR                                | 11.194±2.0<br>7 | 0.000±0.00 | 7.19079 x10 <sup>-4</sup> | -13.43 |
| 462 | Q9NTN9 | SEMA4G  | Semaphorin-4G                                    | EIHWEASPEMQSK<br>CHQK GK               | 11.275±2.7<br>2 | 0.000±0.00 | 1.99781 x10 <sup>-3</sup> | -13.43 |
| 463 | Q9H3M7 | TXNIP   | Thioredoxin-interacting protein                  | VAGRVIVEVCEVT<br>RVK                   | 11.104±0.6<br>5 | 0.000±0.00 | 7.60807 x10 <sup>-6</sup> | -13.44 |
| 464 | Q8N103 | TAGAP   | T-cell activation Rho GTPase-activating protein  | EVSPEPIVSTVAR                          | 11.120±0.8<br>7 | 0.000±0.00 | 2.50602 x10 <sup>-5</sup> | -13.44 |
| 465 | Q9BS31 | ZNF649  | Zinc finger protein 649                          | AFSQKSCLVAHQ<br>R                      | 11.177±1.4<br>9 | 0.000±0.00 | 2.00824 x10 <sup>-4</sup> | -13.44 |
| 466 | O43172 | PRPF4   | U4/U6 small nuclear ribonucleoprotein Prp4       | APDDLVA PVVKK<br>PHIYYGSLEEKER         | 11.122±0.6<br>3 | 0.000±0.00 | 6.92519 x10 <sup>-6</sup> | -13.44 |
| 467 | O76054 | SEC14L2 | SEC14-like protein 2                             | APKLFVAYNLIK<br>PFLSEDTRK              | 11.153±0.2<br>3 | 0.000±0.00 | 1.20519 x10 <sup>-7</sup> | -13.44 |
| 468 | O43426 | SYNJ1   | Synaptojanin-1                                   | ASAGRLTPESQSK                          | 11.158±0.4<br>0 | 0.000±0.00 | 1.09299 x10 <sup>-6</sup> | -13.45 |
| 469 | O00505 | KPNA3   | Importin subunit alpha-4                         | AENPSLENHR                             | 11.247±1.7<br>1 | 0.000±0.00 | 3.36733 x10 <sup>-4</sup> | -13.45 |
| 470 | Q8NH55 | OR52E5  | Olfactory receptor 52E5                          | IIPHTYCEHMGLA<br>K                     | 11.250±1.6<br>2 | 0.000±0.00 | 2.7161 x10 <sup>-4</sup>  | -13.45 |
| 471 | Q13595 | TRA2A   | Transformer-2 protein homolog alpha              | DLREVFSR                               | 11.261±1.7<br>8 | 0.000±0.00 | 3.94223 x10 <sup>-4</sup> | -13.45 |
| 472 | O14965 | AURKA   | Aurora kinase A                                  | EVLEHPWITANSS<br>KPSNCQNK              | 11.179±0.4<br>3 | 0.000±0.00 | 1.46407 x10 <sup>-6</sup> | -13.45 |
| 473 | Q9H354 | PRO1933 | Putative uncharacterized protein PRO1933         | FMVDIPIIKNTQVL<br>RIPVLK               | 11.199±0.5<br>6 | 0.000±0.00 | 4.02651 x10 <sup>-6</sup> | -13.45 |

|     |        |         |                                                       |                         |                 |            |                           |        |
|-----|--------|---------|-------------------------------------------------------|-------------------------|-----------------|------------|---------------------------|--------|
| 474 | Q8N8X9 | MAB21L3 | Protein mab-21-like 3                                 | ARWPRCLQR               | 11.201±0.5<br>3 | 0.000±0.00 | 3.23324 x10 <sup>-6</sup> | -13.45 |
| 475 | Q14627 | IL13RA2 | Interleukin-13 receptor subunit alpha-2               | ECTVEYELKYRNI<br>GSETWK | 11.296±1.7<br>9 | 0.000±0.00 | 3.98237 x10 <sup>-4</sup> | -13.45 |
| 476 | P17036 | ZNF3    | Zinc finger protein 3                                 | DISQGLKFKEAYE<br>R      | 11.201±0.3<br>3 | 0.000±0.00 | 4.83128 x10 <sup>-7</sup> | -13.45 |
| 477 | Q05195 | MXD1    | Max dimerization protein 1                            | GLVPLGPSSR              | 11.222±0.1<br>5 | 0.000±0.00 | 1.97258 x10 <sup>-8</sup> | -13.45 |
| 478 | Q49MI3 | CERKL   | Ceramide kinase-like protein                          | EATQVYYEK               | 11.326±1.9<br>3 | 0.000±0.00 | 5.29055 x10 <sup>-4</sup> | -13.45 |
| 479 | O96013 | PAK4    | Serine/threonine-protein kinase PAK 4                 | AMKMIRDNLPPR            | 11.280±1.3<br>3 | 0.000±0.00 | 1.24907 x10 <sup>-4</sup> | -13.45 |
| 480 | P57055 | RIPPLY3 | Protein ripply3                                       | DQGINQGQR               | 11.311±1.5<br>8 | 0.000±0.00 | 2.40408 x10 <sup>-4</sup> | -13.46 |
| 481 | Q68D10 | SPTY2D1 | Protein SPT2 homolog                                  | AAQGPQR                 | 11.505±3.1<br>1 | 0.000±0.00 | 3.06567 x10 <sup>-3</sup> | -13.46 |
| 482 | Q96LS8 | C2orf48 | Putative uncharacterized protein C2orf48              | LSGWELTK                | 11.287±1.2<br>0 | 0.000±0.00 | 8.33496 x10 <sup>-5</sup> | -13.46 |
| 483 | P55084 | HADHB   | Trifunctional enzyme subunit beta, mitochondrial      | LAAAFAVSRLEQ<br>DEYALR  | 11.257±0.5<br>8 | 0.000±0.00 | 4.52177 x10 <sup>-6</sup> | -13.46 |
| 484 | P45452 | MMP13   | Collagenase 3                                         | LIEEDFPGIGDKV<br>DAVYEK | 11.261±0.6<br>0 | 0.000±0.00 | 5.29316 x10 <sup>-6</sup> | -13.46 |
| 485 | Q8NHY3 | GAS2L2  | GAS2-like protein 2                                   | EERYPPELPRGR            | 11.284±0.8<br>8 | 0.000±0.00 | 2.4614 x10 <sup>-5</sup>  | -13.46 |
| 486 | Q1XH10 | SKIDA1  | SKI/DACH domain-containing protein 1                  | RTDLTINCLAEGA<br>SSSPK  | 11.272±0.5<br>0 | 0.000±0.00 | 2.5714 x10 <sup>-6</sup>  | -13.46 |
| 487 | P02686 | MBP     | Myelin basic protein                                  | GNHAGKRELNAE<br>K       | 11.283±0.7<br>0 | 0.000±0.00 | 9.89513 x10 <sup>-6</sup> | -13.46 |
| 488 | O14832 | PHYH    | Phytanoyl-CoA dioxygenase, peroxisomal                | LVKGERTNL               | 11.411±2.2<br>2 | 0.000±0.00 | 8.81742 x10 <sup>-4</sup> | -13.46 |
| 489 | Q86W54 | SPATA24 | Spermatogenesis-associated protein 24                 | CNEIESHIIKQEDI<br>LNGK  | 11.318±1.2<br>0 | 0.000±0.00 | 8.16183 x10 <sup>-5</sup> | -13.46 |
| 490 | O95243 | MBD4    | Methyl-CpG-binding domain protein 4                   | GCRKSCSGFVQSD<br>SK     | 11.303±0.8<br>3 | 0.000±0.00 | 1.96058 x10 <sup>-5</sup> | -13.46 |
| 491 | Q8N398 | VWA5B2  | von Willebrand factor A domain-containing protein 5B2 | ALGDPATPTEGPR           | 11.308±0.6<br>7 | 0.000±0.00 | 8.39572 x10 <sup>-6</sup> | -13.46 |
| 492 | Q2M3G0 | ABCB5   | ATP-binding cassette sub-family B member 5            | EKAFAQMYEEML<br>QTQHR   | 11.296±0.1<br>2 | 0.000±0.00 | 9.65412 x10 <sup>-9</sup> | -13.46 |
| 493 | POCB48 | UBTFL6  | Putative upstream-binding factor 1-like protein 6     | EYKVELDLWLK             | 11.301±0.3      | 0.000±0.00 | 7.97172 x10 <sup>-7</sup> | -13.46 |

|     |        |         |                                                                     |                             |                 |            |                               |        |
|-----|--------|---------|---------------------------------------------------------------------|-----------------------------|-----------------|------------|-------------------------------|--------|
|     |        |         |                                                                     |                             | 7               |            |                               |        |
| 494 | Q5TC82 | RC3H1   | Roquin-1                                                            | DAKPKDVVAAGS<br>VEMMNVESK   | 11.348±1.1<br>4 | 0.000±0.00 | 6.69558 x10 <sup>-5</sup>     | -13.47 |
| 495 | Q8NDL9 | AGBL5   | Cytosolic carboxypeptidase-like protein 5                           | ELLCYSLDGLR                 | 11.474±2.4<br>5 | 0.000±0.00 | 1.247594<br>x10 <sup>-3</sup> | -13.47 |
| 496 | O75880 | SCO1    | Protein SCO1 homolog, mitochondrial                                 | EAIANYVKEFSPK               | 11.329±0.2<br>8 | 0.000±0.00 | 2.47281 x10 <sup>-7</sup>     | -13.47 |
| 497 | Q9NQR1 | KMT5A   | N-lysine methyltransferase KMT5A                                    | GDFVVEYHGDIE<br>ITDAKKR     | 11.335±0.3<br>4 | 0.000±0.00 | 5.21381 x10 <sup>-7</sup>     | -13.47 |
| 498 | Q6PJT7 | ZC3H14  | Zinc finger CCCH domain-containing protein 14                       | LLERCKYWPACK                | 11.439±1.8<br>9 | 0.000±0.00 | 4.65207 x10 <sup>-4</sup>     | -13.47 |
| 499 | Q8TBE0 | BAHD1   | Bromo adjacent homology domain-containing 1<br>protein              | AHAEVDGRSTEPP<br>APK        | 11.366±0.9<br>0 | 0.000±0.00 | 2.5349 x10 <sup>-5</sup>      | -13.47 |
| 500 | O94808 | GFPT2   | Glutamine--fructose-6-phosphate aminotransferase<br>[isomerizing] 2 | EIFEQPESVFNTM<br>RGR        | 11.369±0.9<br>7 | 0.000±0.00 | 3.40685 x10 <sup>-5</sup>     | -13.47 |
| 501 | P0CB33 | ZNF735  | Putative zinc finger protein 735                                    | AFKWHSSLAKHK                | 11.396±1.3<br>3 | 0.000±0.00 | 1.2182 x10 <sup>-4</sup>      | -13.47 |
| 502 | Q9Y620 | RAD54B  | DNA repair and recombination protein RAD54B                         | EPSASEEKEKELGE<br>RR        | 11.356±0.0<br>5 | 0.000±0.00 | 2.73152 x10 <sup>-10</sup>    | -13.47 |
| 503 | Q8N9W8 | GARIN2  | Golgi-associated RAB2 interactor protein 2                          | KNTSKTTMR                   | 11.422±1.3<br>9 | 0.000±0.00 | 1.41465 x10 <sup>-4</sup>     | -13.47 |
| 504 | Q96EK4 | THAP11  | THAP domain-containing protein 11                                   | DILALMEVK                   | 11.422±1.4<br>0 | 0.000±0.00 | 1.43604 x10 <sup>-4</sup>     | -13.47 |
| 505 | Q86VR8 | FJX1    | Four-jointed box protein 1                                          | FADGTRACVR                  | 11.398±1.0<br>4 | 0.000±0.00 | 4.51279 x10 <sup>-5</sup>     | -13.47 |
| 506 | Q04912 | MST1R   | Macrophage-stimulating protein receptor                             | DILDREYYSVQQH<br>R          | 11.427±1.3<br>8 | 0.000±0.00 | 1.36549 x10 <sup>-4</sup>     | -13.47 |
| 507 | Q9UKF7 | PITPNC1 | Cytoplasmic phosphatidylinositol transfer protein 1                 | EFERATQEATNK                | 11.395±0.7<br>1 | 0.000±0.00 | 9.82677 x10 <sup>-6</sup>     | -13.47 |
| 508 | P10997 | IAPP    | Islet amyloid polypeptide                                           | GILKLQVFLIVLSV<br>ALNHLK    | 11.384±0.3<br>4 | 0.000±0.00 | 5.35349 x10 <sup>-7</sup>     | -13.47 |
| 509 | P29371 | TACR3   | Neuromedin-K receptor                                               | DPSFNGCSR                   | 11.383±0.2<br>9 | 0.000±0.00 | 2.77326 x10 <sup>-7</sup>     | -13.47 |
| 510 | Q3MIS6 | ZNF528  | Zinc finger protein 528                                             | ECIKGVNTERSSK               | 11.423±0.8<br>7 | 0.000±0.00 | 2.2102 x10 <sup>-5</sup>      | -13.48 |
| 511 | Q9H568 | ACTL8   | Actin-like protein 8                                                | VELTPMQR                    | 11.405±0.1<br>2 | 0.000±0.00 | 7.29401 x10 <sup>-9</sup>     | -13.48 |
| 512 | Q9NQ89 | C12orf4 | Protein C12orf4                                                     | AELVFKCVKGF<br>MEMASWDGGISR | 11.461±1.3<br>1 | 0.000±0.00 | 1.12204 x10 <sup>-4</sup>     | -13.48 |

|     |            |          |                                                                         |                                            |                 |            |                           |        |
|-----|------------|----------|-------------------------------------------------------------------------|--------------------------------------------|-----------------|------------|---------------------------|--------|
| 513 | Q9Y2E4     | DIP2C    | Disco-interacting protein 2 homolog C                                   | IQQLVNTLKRPKR<br>PPLR                      | 11.430±0.6<br>7 | 0.000±0.00 | 7.99596 x10 <sup>-6</sup> | -13.48 |
| 514 | Q86W34     | AMZ2     | Archaeometzincin-2                                                      | KTPSPNKR                                   | 11.420±0.3<br>2 | 0.000±0.00 | 4.05351 x10 <sup>-7</sup> | -13.48 |
| 515 | Q12933     | TRAF2    | TNF receptor-associated factor 2                                        | AAASVTPPGSLEL<br>LQPGFSK                   | 11.442±0.8<br>8 | 0.000±0.00 | 2.32099 x10 <sup>-5</sup> | -13.48 |
| 516 | Q6P597     | KLC3     | Kinesin light chain 3                                                   | ALSIYEALGGPHD<br>PNVAK                     | 11.439±0.7<br>6 | 0.000±0.00 | 1.25753 x10 <sup>-5</sup> | -13.48 |
| 517 | Q96QF0     | RAB3IP   | Rab-3A-interacting protein                                              | DQLGQELEELTAS<br>LFEEAHK                   | 11.458±0.8<br>4 | 0.000±0.00 | 1.89863 x10 <sup>-5</sup> | -13.48 |
| 518 | Q9P212     | PLCE1    | 1-phosphatidylinositol 4,5-bisphosphate<br>phosphodiesterase epsilon-1  | EYDSHGSEDSQK                               | 11.484±1.1<br>6 | 0.000±0.00 | 6.87772 x10 <sup>-5</sup> | -13.48 |
| 519 | Q8N4F0     | BPIFB2   | BPI fold-containing family B member 2                                   | ILNVHVPRLHLKF<br>IAGFGVR                   | 11.454±0.5<br>2 | 0.000±0.00 | 2.78629 x10 <sup>-6</sup> | -13.48 |
| 520 | Q8WVC0     | LEO1     | RNA polymerase-associated protein LEO1                                  | ANSDDERPVASD<br>NDDEK                      | 11.468±0.4<br>6 | 0.000±0.00 | 1.66993 x10 <sup>-6</sup> | -13.48 |
| 521 | Q86YR6     | POTED    | POTE ankyrin domain family member D                                     | DLIVMLRDTDMN<br>KR                         | 11.496±1.0<br>1 | 0.000±0.00 | 3.86754 x10 <sup>-5</sup> | -13.48 |
| 522 | Q5QJ74     | TBCEL    | Tubulin-specific chaperone cofactor E-like protein                      | EIAAFCAHVSELD<br>LSDNK                     | 11.494±0.3<br>7 | 0.000±0.00 | 7.01836 x10 <sup>-7</sup> | -13.49 |
| 523 | O75251     | NDUFS7   | NADH dehydrogenase [ubiquinone] iron-sulfur<br>protein 7, mitochondrial | AVLSAPGLR                                  | 11.495±0.3<br>5 | 0.000±0.00 | 5.73284 x10 <sup>-7</sup> | -13.49 |
| 524 | Q14526     | HIC1     | Hypermethylated in cancer 1 protein                                     | ERGSPSER                                   | 11.561±1.5<br>2 | 0.000±0.00 | 1.89686 x10 <sup>-4</sup> | -13.49 |
| 525 | Q8WUF5     | PPP1R13L | RelA-associated inhibitor                                               | HMDLKQMELDTA<br>AAK                        | 11.511±0.5<br>9 | 0.000±0.00 | 4.49101 x10 <sup>-6</sup> | -13.49 |
| 526 | Q9BQ31     | KCNS3    | Potassium voltage-gated channel subfamily S<br>member 3                 | FDTLRFGQLRK                                | 11.513±0.2<br>7 | 0.000±0.00 | 1.99314 x10 <sup>-7</sup> | -13.49 |
| 527 | Q9NXW2     | DNAJB12  | DnaJ homolog subfamily B member 12                                      | AIGTAYAVLSNPE<br>K                         | 11.535±0.8<br>8 | 0.000±0.00 | 2.20728 x10 <sup>-5</sup> | -13.49 |
| 528 | Q96QF7     | GCNA     | Germ cell nuclear acidic protein                                        | IGWNNKMVK                                  | 11.558±1.1<br>9 | 0.000±0.00 | 7.21116 x10 <sup>-5</sup> | -13.49 |
| 529 | A0A096LP49 | CCDC187  | Coiled-coil domain-containing protein 187                               | EAEHLGTSSSLHL<br>R                         | 11.536±0.8<br>4 | 0.000±0.00 | 1.86204 x10 <sup>-5</sup> | -13.49 |
| 530 | Q9H869     | YY1AP1   | YY1-associated protein 1                                                | ILFTKAEDNKYLL<br>TCK                       | 11.524±0.3<br>8 | 0.000±0.00 | 7.72957 x10 <sup>-7</sup> | -13.49 |
| 531 | Q92526     | CCT6B    | T-complex protein 1 subunit zeta-2                                      | AIKNAIEDGCMVP<br>GAGAIEVAMAEA<br>LVTYKNSIK | 11.528±0.1<br>8 | 0.000±0.00 | 4.13211 x10 <sup>-8</sup> | -13.49 |

|     |        |         |                                                                     |                        |                 |            |                            |        |
|-----|--------|---------|---------------------------------------------------------------------|------------------------|-----------------|------------|----------------------------|--------|
| 532 | Q6IA69 | NADSYN1 | Glutamine-dependent NAD                                             | ELRWFTPWSR             | 11.769±2.8<br>2 | 0.000±0.00 | 1.95167x10 <sup>-3</sup>   | -13.50 |
| 533 | Q9Y2G7 | ZFP30   | Zinc finger protein 30 homolog                                      | IHTSDKLYECK            | 11.587±0.9<br>7 | 0.000±0.00 | 3.17536 x10 <sup>-5</sup>  | -13.50 |
| 534 | P51178 | PLCD1   | 1-phosphatidylinositol 4,5-bisphosphate phosphodiesterase delta-1   | HNVGHLRSR              | 11.623±1.2<br>6 | 0.000±0.00 | 8.96602 x10 <sup>-5</sup>  | -13.50 |
| 535 | Q6W3E5 | GDPD4   | Glycerophosphodiester phosphodiesterase domain-containing protein 4 | IELYLHLCHK             | 11.599±0.6<br>8 | 0.000±0.00 | 8.01993 x10 <sup>-6</sup>  | -13.50 |
| 536 | O95822 | MLYCD   | Malonyl-CoA decarboxylase, mitochondrial                            | ISEAEAVHPVK            | 11.675±1.6<br>3 | 0.000±0.00 | 2.43565 x10 <sup>-4</sup>  | -13.50 |
| 537 | P04629 | NTRK1   | High affinity nerve growth factor receptor                          | DLRGLGELR              | 11.748±2.2<br>9 | 0.000±0.00 | 8.83493 x10 <sup>-4</sup>  | -13.50 |
| 538 | O43583 | DENR    | Density-regulated protein                                           | LDADYPLR               | 11.614±0.2<br>8 | 0.000±0.00 | 2.27469 x10 <sup>-7</sup>  | -13.50 |
| 539 | Q99962 | SH3GL2  | Endophilin-A1                                                       | TIEYLQNPASR            | 11.639±0.9<br>1 | 0.000±0.00 | 2.40888 x10 <sup>-5</sup>  | -13.50 |
| 540 | O15049 | N4BP3   | NEDD4-binding protein 3                                             | AALAGSR                | 11.624±0.5<br>7 | 0.000±0.00 | 3.84979 x10 <sup>-6</sup>  | -13.50 |
| 541 | Q96QE4 | LRRC37B | Leucine-rich repeat-containing protein 37B                          | EVPGDDYKNK             | 11.644±0.9<br>6 | 0.000±0.00 | 3.06679 x10 <sup>-5</sup>  | -13.50 |
| 542 | Q5VTL8 | PRPF38B | Pre-mRNA-splicing factor 38B                                        | EAKEREK                | 11.632±0.6<br>3 | 0.000±0.00 | 5.52931 x10 <sup>-6</sup>  | -13.50 |
| 543 | Q9Y3D5 | MRPS18C | 28S ribosomal protein S18c, mitochondrial                           | CILCGKHVDYK            | 11.653±1.0<br>5 | 0.000±0.00 | 4.27441 x10 <sup>-5</sup>  | -13.50 |
| 544 | Q6P9B9 | INTS5   | Integrator complex subunit 5                                        | ATVERDLRIGR            | 11.724±1.7<br>4 | 0.000±0.00 | 3.08508 x10 <sup>-4</sup>  | -13.51 |
| 545 | Q9Y4C4 | MFHAS1  | Malignant fibrous histiocytoma-amplified sequence 1                 | GIPYIAAYQK             | 11.636±0.1<br>4 | 0.000±0.00 | 1.2215 x10 <sup>-8</sup>   | -13.51 |
| 546 | O00233 | PSMD9   | 26S proteasome non-ATPase regulatory subunit 9                      | ANYDVLESQK             | 11.659±0.8<br>1 | 0.000±0.00 | 1.51775 x10 <sup>-5</sup>  | -13.51 |
| 547 | Q6NSJ0 | MYORG   | Myogenesis-regulating glycosidase                                   | AGGFSIRNQK             | 11.676±0.8<br>9 | 0.000±0.00 | 2.25297 x10 <sup>-5</sup>  | -13.51 |
| 548 | Q9NP78 | ABCB9   | ABC-type oligopeptide transporter ABCB9                             | QPTMVHDGSLAP<br>DHLEGR | 11.655±0.0<br>1 | 0.000±0.00 | 3.14369 x10 <sup>-13</sup> | -13.51 |
| 549 | Q9H252 | KCNH6   | Potassium voltage-gated channel subfamily H member 6                | ALLQHCPAFSGA<br>GKGCLR | 11.657±0.1<br>6 | 0.000±0.00 | 2.57738 x10 <sup>-8</sup>  | -13.51 |
| 550 | Q13586 | STIM1   | Stromal interaction molecule 1                                      | ALLALNHGLDK            | 11.705±1.2<br>8 | 0.000±0.00 | 9.25755 x10 <sup>-5</sup>  | -13.51 |
| 551 | O15062 | ZBTB5   | Zinc finger and BTB domain-containing protein 5                     | GGASNFPYYRR            | 11.686±0.9      | 0.000±0.00 | 2.3933 x10 <sup>-5</sup>   | -13.51 |

|     |        |          |                                                      |                                          |                 |            |                           |        |
|-----|--------|----------|------------------------------------------------------|------------------------------------------|-----------------|------------|---------------------------|--------|
|     |        |          |                                                      |                                          | 1               |            |                           |        |
| 552 | Q14957 | GRIN2C   | Glutamate receptor ionotropic, NMDA 2C               | HLSASERPLSPAR<br>CHYSSFPRADR             | 11.714±1.3<br>1 | 0.000±0.00 | 1.02564 x10 <sup>-4</sup> | -13.51 |
| 553 | O15305 | PMM2     | Phosphomannomutase 2                                 | AAPGPALCLFDV<br>DGTLTAPR                 | 11.729±1.3<br>5 | 0.000±0.00 | 1.15215 x10 <sup>-4</sup> | -13.51 |
| 554 | Q13368 | MPP3     | MAGUK p55 subfamily member 3                         | ALFHYNPR                                 | 11.697±0.7<br>6 | 0.000±0.00 | 1.17485 x10 <sup>-5</sup> | -13.51 |
| 555 | Q9HCS4 | TCF7L1   | Transcription factor 7-like 1                        | KPLNAFMLYMK<br>MR                        | 11.684±0.1<br>7 | 0.000±0.00 | 2.96855 x10 <sup>-8</sup> | -13.51 |
| 556 | O14618 | CCS      | Copper chaperone for superoxide dismutase            | QAVLKGMSGQL<br>QNLGAAVAILGG<br>PGTVQGVVR | 11.693±0.2<br>8 | 0.000±0.00 | 2.16635 x10 <sup>-7</sup> | -13.51 |
| 557 | B2RXF0 | TMEM229A | Transmembrane protein 229A                           | MAGSDVDSEGA<br>RR                        | 11.697±0.4<br>2 | 0.000±0.00 | 1.12428 x10 <sup>-6</sup> | -13.51 |
| 558 | P0DN78 | OPN1MW3  | Medium-wave-sensitive opsin 3                        | AVAKQQK                                  | 11.745±1.2<br>5 | 0.000±0.00 | 8.46053 x10 <sup>-5</sup> | -13.51 |
| 559 | Q6IQ16 | SPOPL    | Speckle-type POZ protein-like                        | AMESQRAYR                                | 11.703±0.3<br>5 | 0.000±0.00 | 5.18389 x10 <sup>-7</sup> | -13.51 |
| 560 | Q9GZU1 | MCOLN1   | Mucolipin-1                                          | IPISLETQAHIQE<br>K                       | 11.715±0.4<br>6 | 0.000±0.00 | 1.60381 x10 <sup>-6</sup> | -13.52 |
| 561 | I0J062 | PANO1    | Proapoptotic nucleolar protein 1                     | ADTHHARR                                 | 11.737±0.9<br>2 | 0.000±0.00 | 2.51938 x10 <sup>-5</sup> | -13.52 |
| 562 | Q9NWL6 | ASNSD1   | Asparagine synthetase domain-containing protein 1    | DDRVIGDHGKEA<br>R                        | 11.750±1.0<br>7 | 0.000±0.00 | 4.4732 x10 <sup>-5</sup>  | -13.52 |
| 563 | Q9Y345 | SLC6A5   | Sodium- and chloride-dependent glycine transporter 2 | DLELGTQC                                 | 11.796±0.8<br>4 | 0.000±0.00 | 1.65994 x10 <sup>-5</sup> | -13.52 |
| 564 | Q08A18 | MAB21L4  | Protein mab-21-like 4                                | FQVFNIQDK                                | 11.784±0.3<br>2 | 0.000±0.00 | 3.77405 x10 <sup>-7</sup> | -13.52 |
| 565 | Q6ZU64 | CFAP65   | Cilia- and flagella-associated protein 65            | DEKVRQVEVEFTIT<br>DMK                    | 11.896±1.9<br>3 | 0.000±0.00 | 4.3569 x10 <sup>-4</sup>  | -13.53 |
| 566 | P0CW27 | CCDC166  | Coiled-coil domain-containing protein 166            | GPSAGSQPGGAA<br>AAGAEQPLSER              | 11.800±0.2<br>1 | 0.000±0.00 | 6.94179 x10 <sup>-8</sup> | -13.53 |
| 567 | Q58F21 | BRDT     | Bromodomain testis-specific protein                  | EHQSSEAQDKS<br>K                         | 11.904±1.8<br>7 | 0.000±0.00 | 3.87687 x10 <sup>-4</sup> | -13.53 |
| 568 | Q9P2R3 | ANKFY1   | Rabankyrin-5                                         | ESGAAEQVDNK                              | 11.819±0.2<br>1 | 0.000±0.00 | 6.70599 x10 <sup>-8</sup> | -13.53 |
| 569 | Q8NDW8 | TTC21A   | Tetratricopeptide repeat protein 21A                 | FSNDPVLKFFK                              | 11.841±0.8<br>9 | 0.000±0.00 | 2.12837 x10 <sup>-5</sup> | -13.53 |
| 570 | Q15773 | MLF2     | Myeloid leukemia factor 2                            | LAIQGPEDSPSR                             | 12.034±2.6      | 0.000±0.00 | 1.43477 x10 <sup>-3</sup> | -13.53 |

|     |        |          |                                                  |                         |                 |            |                            |        |
|-----|--------|----------|--------------------------------------------------|-------------------------|-----------------|------------|----------------------------|--------|
|     |        |          |                                                  |                         | 6               |            |                            |        |
| 571 | Q14203 | DCTN1    | Dynactin subunit 1                               | AELKQRLNSQSK            | 11.840±0.6<br>3 | 0.000±0.00 | 5.41589 x10 <sup>-6</sup>  | -13.53 |
| 572 | Q9NQZ7 | ENTPD7   | Ectonucleoside triphosphate diphosphohydrolase 7 | DRQYERYLAR              | 11.839±0.1<br>2 | 0.000±0.00 | 6.92107 x10 <sup>-9</sup>  | -13.53 |
| 573 | Q9UKR5 | ERG28    | Ergosterol biosynthetic protein 28 homolog       | CLCAIDIHMK              | 11.843±0.0<br>8 | 0.000±0.00 | 1.18008 x10 <sup>-9</sup>  | -13.53 |
| 574 | O14793 | MSTN     | Growth/differentiation factor 8                  | IEAIKIQILSK             | 11.873±1.0<br>1 | 0.000±0.00 | 3.4583 x10 <sup>-5</sup>   | -13.53 |
| 575 | Q6UWZ7 | ABRAXAS1 | BRCA1-A complex subunit Abraxas 1                | ALDLDDR                 | 11.854±0.4<br>8 | 0.000±0.00 | 1.85913 x10 <sup>-6</sup>  | -13.53 |
| 576 | Q16533 | SNAPC1   | snRNA-activating protein complex subunit 1       | FEDFTELWR               | 11.850±0.2<br>0 | 0.000±0.00 | 5.57078 x10 <sup>-8</sup>  | -13.53 |
| 577 | Q5MJ70 | SPDYA    | Speedy protein A                                 | NTHNNNKSK               | 11.872±0.7<br>7 | 0.000±0.00 | 1.18182 x10 <sup>-5</sup>  | -13.53 |
| 578 | Q8WTQ7 | GRK7     | Rhodopsin kinase GRK7                            | AATFLEDVQNWELAE<br>GPTK | 12.015±2.3<br>1 | 0.000±0.00 | 8.4464 x10 <sup>-4</sup>   | -13.53 |
| 579 | P26006 | ITGA3    | Integrin alpha-3                                 | EAGNPGSLFGYSVAL<br>HR   | 11.878±0.6<br>8 | 0.000±0.00 | 7.15928 x10 <sup>-6</sup>  | -13.53 |
| 580 | Q6PGN9 | PSRC1    | Proline/serine-rich coiled-coil protein 1        | AAASEETRAAK             | 11.882±0.7<br>6 | 0.000±0.00 | 1.07953 x10 <sup>-5</sup>  | -13.53 |
| 581 | Q5T7R7 | C1orf185 | Uncharacterized protein C1orf185                 | AIDERCR                 | 11.884±0.4<br>7 | 0.000±0.00 | 1.6379 x10 <sup>-6</sup>   | -13.54 |
| 582 | Q03518 | TAP1     | Antigen peptide transporter 1                    | IFEYLDRTPR              | 11.879±0.1<br>1 | 0.000±0.00 | 5.85486 x10 <sup>-9</sup>  | -13.54 |
| 583 | Q5VTL7 | FNDC7    | Fibronectin type III domain-containing protein 7 | DAFSMINVHWR             | 11.944±1.5<br>0 | 0.000±0.00 | 1.61594 x10 <sup>-4</sup>  | -13.54 |
| 584 | Q8TBZ6 | TRMT10A  | tRNA methyltransferase 10 homolog A              | KQGINEDQEE<br>SQKPR     | 11.946±0.8<br>5 | 0.000±0.00 | 1.69678 x10 <sup>-5</sup>  | -13.54 |
| 585 | Q9BUN1 | MENT     | Protein MENT                                     | ELPSATPNTAGSS<br>STR    | 11.934±0.0<br>5 | 0.000±0.00 | 2.87801 x10 <sup>-10</sup> | -13.54 |
| 586 | Q96B26 | EXOSC8   | Exosome complex component RRP43                  | AAGFKTVEPLEY<br>YR      | 11.940±0.3<br>7 | 0.000±0.00 | 6.12434 x10 <sup>-7</sup>  | -13.54 |
| 587 | P78310 | CXADR    | Coxsackievirus and adenovirus receptor           | AKGETAYLPCK             | 12.065±2.0<br>4 | 0.000±0.00 | 5.10268 x10 <sup>-4</sup>  | -13.54 |
| 588 | Q5UE93 | PIK3R6   | Phosphoinositide 3-kinase regulatory subunit 6   | ATGITEELYQR             | 12.007±1.2<br>0 | 0.000±0.00 | 6.61192 x10 <sup>-5</sup>  | -13.55 |
| 589 | Q5VVJ2 | MYSM1    | Deubiquitinase MYSM1                             | AWTPSCLRGR              | 12.029±1.4<br>3 | 0.000±0.00 | 1.3081 x10 <sup>-4</sup>   | -13.55 |

|     |        |         |                                                           |                              |                 |            |                           |        |
|-----|--------|---------|-----------------------------------------------------------|------------------------------|-----------------|------------|---------------------------|--------|
| 590 | Q8IZF7 | ADGRF2  | Adhesion G-protein coupled receptor F2                    | ELKRISLIFEK                  | 12.187±2.8<br>0 | 0.000±0.00 | 1.66448 x10 <sup>-4</sup> | -13.55 |
| 591 | Q96EF6 | FBXO17  | F-box only protein 17                                     | EEFPLCALARYCL<br>RAPFGR      | 12.048±1.5<br>6 | 0.000±0.00 | 1.79149 x10 <sup>-4</sup> | -13.55 |
| 592 | Q86Z20 | CCDC125 | Coiled-coil domain-containing protein 125                 | DTASNENKEK                   | 12.011±0.3<br>1 | 0.000±0.00 | 2.93218 x10 <sup>-7</sup> | -13.55 |
| 593 | Q8WXI4 | ACOT11  | Acyl-coenzyme A thioesterase 11                           | GETLCSGFCLWRE<br>GDQLTKCCWVR | 12.145±2.0<br>0 | 0.000±0.00 | 4.65725 x10 <sup>-4</sup> | -13.56 |
| 594 | Q68E01 | INTS3   | Integrator complex subunit 3                              | LLCHLTPSIYTEFP<br>DETLR      | 12.062±0.3<br>5 | 0.000±0.00 | 4.75115 x10 <sup>-7</sup> | -13.56 |
| 595 | Q8N475 | FSTL5   | Follistatin-related protein 5                             | AEEWPWNR                     | 12.234±2.5<br>7 | 0.000±0.00 | 1.17724 x10 <sup>-3</sup> | -13.56 |
| 596 | C9JN71 | ZNF878  | Zinc finger protein 878                                   | AFSFPSSVRR                   | 12.210±2.2<br>8 | 0.000±0.00 | 7.46714 x10 <sup>-4</sup> | -13.56 |
| 597 | Q96AB6 | NTAN1   | Protein N-terminal asparagine amidohydrolase              | GPPEQLRAAR                   | 12.179±1.9<br>9 | 0.000±0.00 | 4.46107 x10 <sup>-4</sup> | -13.56 |
| 598 | Q6Y1H2 | HACD2   | Very-long-chain (3R)-3-hydroxyacyl-CoA<br>dehydratase 2   | GNGGGGGR                     | 12.069±0.3<br>9 | 0.000±0.00 | 7.54449 x10 <sup>-7</sup> | -13.56 |
| 599 | Q9Y334 | VWA7    | von Willebrand factor A domain-containing protein<br>7    | ANPGDPQPHFSHV<br>ILR         | 12.087±0.9<br>1 | 0.000±0.00 | 2.132 x10 <sup>-5</sup>   | -13.56 |
| 600 | P03372 | ESR1    | Estrogen receptor                                         | ERLASTNDKGS<br>AMESAK        | 12.082±0.4<br>8 | 0.000±0.00 | 1.65185 x10 <sup>-6</sup> | -13.56 |
| 601 | P32241 | VIPR1   | Vasoactive intestinal polypeptide receptor 1              | ILLQKLRPPDIRK                | 12.105±1.0<br>1 | 0.000±0.00 | 3.16311 x10 <sup>-5</sup> | -13.56 |
| 602 | Q9P253 | VPS18   | Vacuolar protein sorting-associated protein 18<br>homolog | EFPSNLGYSELAF<br>YTPK        | 12.083±0.4<br>0 | 0.000±0.00 | 7.82842 x10 <sup>-7</sup> | -13.56 |
| 603 | Q96LM6 | TEX37   | Testis-expressed sequence 37 protein                      | DKEFYRPIPNNP<br>K            | 12.095±0.7<br>5 | 0.000±0.00 | 9.88839 x10 <sup>-6</sup> | -13.56 |
| 604 | P41221 | WNT5A   | Protein Wnt-5a                                            | CKKCTEIVDQFVC<br>K           | 12.098±0.5<br>3 | 0.000±0.00 | 2.49625 x10 <sup>-6</sup> | -13.56 |
| 605 | Q9BXB5 | OSBPL10 | Oxysterol-binding protein-related protein 10              | HLEEKQR                      | 12.099±0.4<br>3 | 0.000±0.00 | 1.02189 x10 <sup>-6</sup> | -13.56 |
| 606 | O00238 | BMPR1B  | Bone morphogenetic protein receptor type-1B               | LTALRVK                      | 12.164±1.5<br>5 | 0.000±0.00 | 1.68218 x10 <sup>-4</sup> | -13.56 |
| 607 | P20702 | ITGAX   | Integrin alpha-X                                          | ATFQETKNRSLSR                | 12.099±0.2<br>7 | 0.000±0.00 | 1.77642 x10 <sup>-7</sup> | -13.56 |
| 608 | A6ND91 | ASPDH   | Aspartate dehydrogenase domain-containing<br>protein      | VGVVGYGR                     | 12.279±2.4<br>3 | 0.000±0.00 | 9.43468 x10 <sup>-4</sup> | -13.56 |
| 609 | Q9NQZ5 | STARD7  | StAR-related lipid transfer protein 7, mitochondrial      | IQEEELQR                     | 12.112±0.2      | 0.000±0.00 | 9.37949 x10 <sup>-8</sup> | -13.56 |

|     |        |          |                                                                  |                           |                 |            |                           |        |
|-----|--------|----------|------------------------------------------------------------------|---------------------------|-----------------|------------|---------------------------|--------|
|     |        |          |                                                                  |                           | 3               |            |                           |        |
| 610 | Q7RTU3 | OLIG3    | Oligodendrocyte transcription factor 3                           | AAGESSK                   | 12.184±1.6<br>1 | 0.000±0.00 | 1.95701 x10 <sup>-4</sup> | -13.56 |
| 611 | Q6ZWH5 | NEK10    | Serine/threonine-protein kinase Nek10                            | ALRFLFSMER                | 12.125±0.5<br>2 | 0.000±0.00 | 2.29897 x10 <sup>-6</sup> | -13.56 |
| 612 | O15382 | BCAT2    | Branched-chain-amino-acid aminotransferase, mitochondrial        | ALEEGRVR                  | 12.132±0.1<br>2 | 0.000±0.00 | 6.1273 x10 <sup>-9</sup>  | -13.57 |
| 613 | Q8NFM4 | ADCY4    | Adenylate cyclase type 4                                         | FDQIAKEHECMRI<br>K        | 12.144±0.4<br>7 | 0.000±0.00 | 1.47525 x10 <sup>-6</sup> | -13.57 |
| 614 | Q17R89 | ARHGAP44 | Rho GTPase-activating protein 44                                 | FLSKLSEYQDVNK             | 12.149±0.4<br>9 | 0.000±0.00 | 1.76389 x10 <sup>-6</sup> | -13.57 |
| 615 | Q4ADV7 | RIC1     | Guanine nucleotide exchange factor subunit RIC1                  | LSEITEEQVQPDA<br>FQPITMGK | 12.237±1.6<br>7 | 0.000±0.00 | 2.19464 x10 <sup>-4</sup> | -13.57 |
| 616 | Q6UXZ4 | UNC5D    | Netrin receptor UNC5D                                            | EVFINVTR                  | 12.183±0.2<br>5 | 0.000±0.00 | 1.25613 x10 <sup>-7</sup> | -13.57 |
| 617 | Q9UID3 | VPS51    | Vacuolar protein sorting-associated protein 51 homolog           | AAFLGCLTDVR               | 12.376±2.6<br>9 | 0.000±0.00 | 1.34034x10 <sup>-3</sup>  | -13.57 |
| 618 | P31146 | CORO1A   | Coronin-1A                                                       | LDRLEETVQAK               | 12.272±1.7<br>5 | 0.000±0.00 | 2.65516 x10 <sup>-4</sup> | -13.57 |
| 619 | O43402 | EMC8     | ER membrane protein complex subunit 8                            | ISASLLDSR                 | 12.211±0.7<br>5 | 0.000±0.00 | 9.23963 x10 <sup>-6</sup> | -13.57 |
| 620 | Q03154 | ACY1     | Aminoacylase-1                                                   | CVSIQYLEAVRRL<br>K        | 12.197±0.0<br>7 | 0.000±0.00 | 8.4908 x10 <sup>-10</sup> | -13.57 |
| 621 | Q01970 | PLCB3    | 1-phosphatidylinositol 4,5-bisphosphate phosphodiesterase beta-3 | EAELEINR                  | 12.206±0.1<br>2 | 0.000±0.00 | 5.6287 x10 <sup>-9</sup>  | -13.58 |
| 622 | Q12846 | STX4     | Syntaxin-4                                                       | NILSSADYVER               | 12.224±0.7<br>4 | 0.000±0.00 | 9.09488 x10 <sup>-6</sup> | -13.58 |
| 623 | Q2WJG6 | KLHL38   | Kelch-like protein 38                                            | ILAYDPQSNK                | 12.241±0.9<br>8 | 0.000±0.00 | 2.72376 x10 <sup>-5</sup> | -13.58 |
| 624 | Q9UNN8 | PROCR    | Endothelial protein C receptor                                   | TLAFPLTIR                 | 12.305±1.7<br>0 | 0.000±0.00 | 2.32132 x10 <sup>-4</sup> | -13.58 |
| 625 | Q9BUG6 | ZSCAN5A  | Zinc finger and SCAN domain-containing protein 5A                | ASSVNQMRPGE<br>QAHR       | 12.260±0.8<br>3 | 0.000±0.00 | 1.36661 x10 <sup>-5</sup> | -13.58 |
| 626 | P48730 | CSNK1D   | Casein kinase I isoform delta                                    | FGASRAADDAER              | 12.259±0.5<br>9 | 0.000±0.00 | 3.53538 x10 <sup>-6</sup> | -13.58 |
| 627 | Q9NR97 | TLR8     | Toll-like receptor 8                                             | LVDVICASPGDQR             | 12.272±0.8<br>7 | 0.000±0.00 | 1.66743 x10 <sup>-5</sup> | -13.58 |
| 628 | Q6MZZ7 | CAPN13   | Calpain-13                                                       | CLFVRPR                   | 12.262±0.3<br>6 | 0.000±0.00 | 5.10288 x10 <sup>-7</sup> | -13.58 |

|     |        |          |                                                                |                        |             |            |                           |        |
|-----|--------|----------|----------------------------------------------------------------|------------------------|-------------|------------|---------------------------|--------|
| 629 | O43422 | THAP12   | 52 kDa repressor of the inhibitor of the protein kinase        | FHTMITEK               | 12.289±0.65 | 0.000±0.00 | 5.08722 x10 <sup>-6</sup> | -13.58 |
| 630 | Q8N335 | GPD1L    | Glycerol-3-phosphate dehydrogenase 1-like protein              | IIGNNVK                | 12.282±0.18 | 0.000±0.00 | 3.29192 x10 <sup>-8</sup> | -13.58 |
| 631 | O95232 | LUC7L3   | Luc7-like protein 3                                            | ISAAQLLDELMGRDRNLAPDEK | 12.368±1.77 | 0.000±0.00 | 2.66432 x10 <sup>-4</sup> | -13.58 |
| 632 | Q12772 | SREBF2   | Sterol regulatory element-binding protein 2                    | AIFHACR                | 12.288±0.11 | 0.000±0.00 | 4.17386 x10 <sup>-9</sup> | -13.58 |
| 633 | Q8NC26 | ZNF114   | Zinc finger protein 114                                        | AFFYQSFLMR             | 12.295±0.45 | 0.000±0.00 | 1.21583 x10 <sup>-6</sup> | -13.59 |
| 634 | P82650 | MRPS22   | 28S ribosomal protein S22, mitochondrial                       | DQAAEGINLIK            | 12.316±0.46 | 0.000±0.00 | 1.31498 x10 <sup>-6</sup> | -13.59 |
| 635 | Q9BV57 | ADI1     | Acireductone dioxygenase                                       | FTVDEKKNYTKAMR         | 12.358±1.28 | 0.000±0.00 | 7.60814 x10 <sup>-5</sup> | -13.59 |
| 636 | O15455 | TLR3     | Toll-like receptor 3                                           | DKDWVWEHFSSMEKEDQSLK   | 12.322±0.35 | 0.000±0.00 | 4.35493 x10 <sup>-7</sup> | -13.59 |
| 637 | Q9H1B5 | XYLT2    | Xylosyltransferase 2                                           | LQSLEVGTDWDPK          | 12.343±0.79 | 0.000±0.00 | 1.10066 x10 <sup>-5</sup> | -13.59 |
| 638 | Q8N5Q1 | GARIN5B  | Golgi-associated RAB2 interactor protein 5B                    | AVSPTAPKK              | 12.353±0.92 | 0.000±0.00 | 2.00172 x10 <sup>-5</sup> | -13.59 |
| 639 | Q9UHQ7 | TCEAL9   | Transcription elongation factor A protein-like 9               | EVDEIDEIR              | 12.416±1.65 | 0.000±0.00 | 2.01978 x10 <sup>-4</sup> | -13.59 |
| 640 | Q6ZVD8 | PHLPP2   | PH domain leucine-rich repeat-containing protein phosphatase 2 | DWLREDVKR              | 12.393±1.30 | 0.000±0.00 | 7.99829 x10 <sup>-5</sup> | -13.59 |
| 641 | Q9UP83 | COG5     | Conserved oligomeric Golgi complex subunit 5                   | AKIVEPYNK              | 12.460±1.52 | 0.000±0.00 | 1.41255 x10 <sup>-4</sup> | -13.60 |
| 642 | Q9Y2R2 | PTPN22   | Tyrosine-protein phosphatase non-receptor type 22              | CYQEDDSVPICIHCSAGCGR   | 12.462±1.35 | 0.000±0.00 | 8.97019 x10 <sup>-5</sup> | -13.60 |
| 643 | Q99549 | MPHOSPH8 | M-phase phosphoprotein 8                                       | EVLLEFRK               | 12.430±0.63 | 0.000±0.00 | 4.4475 x10 <sup>-6</sup>  | -13.60 |
| 644 | Q9BQQ7 | RTP3     | Receptor-transporting protein 3                                | AGDTEVWKQMFQELMR       | 12.441±0.39 | 0.000±0.00 | 6.63839 x10 <sup>-7</sup> | -13.60 |
| 645 | Q6ZUI0 | TPRG1    | Tumor protein p63-regulated gene 1 protein                     | IDHWNNEK               | 12.487±1.28 | 0.000±0.00 | 7.1054 x10 <sup>-5</sup>  | -13.60 |
| 646 | Q8NEZ2 | VPS37A   | Vacuolar protein sorting-associated protein 37A                | DDLVKSIEELAR           | 12.450±0.38 | 0.000±0.00 | 5.71528 x10 <sup>-7</sup> | -13.60 |
| 647 | Q6ZMT9 | DTHD1    | Death domain-containing protein 1                              | DLHLEGFGGPPEPSRHFQVR   | 12.462±0.75 | 0.000±0.00 | 8.67612 x10 <sup>-6</sup> | -13.60 |
| 648 | Q9Y2P4 | SLC27A6  | Long-chain fatty acid transport protein 6                      | EFLDRFGNIK             | 12.472±0.7  | 0.000±0.00 | 7.84724 x10 <sup>-6</sup> | -13.60 |

|     |        |           |                                                            |                                   |                 |            |                            |        |
|-----|--------|-----------|------------------------------------------------------------|-----------------------------------|-----------------|------------|----------------------------|--------|
|     |        |           |                                                            |                                   | 3               |            |                            |        |
| 649 | Q9P1V8 | SAMD15    | Sterile alpha motif domain-containing protein 15           | LEFP EEESR                        | 12.498±1.1<br>3 | 0.000±0.00 | 4.31416 x10 <sup>-5</sup>  | -13.61 |
| 650 | P07738 | BPGM      | Bisphosphoglycerate mutase                                 | HGEGAWNK                          | 12.508±0.6<br>4 | 0.000±0.00 | 4.57252 x10 <sup>-6</sup>  | -13.61 |
| 651 | Q9BTP7 | FAAP24    | Fanconi anemia core complex-associated protein 24          | TVQQIPGVGK                        | 12.628±2.2<br>5 | 0.000±0.00 | 6.23762 x10 <sup>-4</sup>  | -13.61 |
| 652 | Q8N7E2 | CBLL2     | E3 ubiquitin-protein ligase CBLL2                          | LSPCPPTRSPPPST<br>LHGR            | 12.516±0.6<br>3 | 0.000±0.00 | 4.18348 x10 <sup>-6</sup>  | -13.61 |
| 653 | Q96HW7 | INTS4     | Integrator complex subunit 4                               | CQLLLIKALQEK                      | 12.522±0.0<br>6 | 0.000±0.00 | 3.10283 x10 <sup>-10</sup> | -13.61 |
| 654 | O43548 | TGM5      | Protein-glutamine gamma-glutamyltransferase 5              | ISALGEEKSSPEK                     | 12.536±0.1<br>6 | 0.000±0.00 | 1.83545 x10 <sup>-8</sup>  | -13.61 |
| 655 | Q96PD2 | DCBLD2    | Discoidin, CUB and LCCL domain-containing protein 2        | APKFTQPLQPR                       | 12.553±0.6<br>1 | 0.000±0.00 | 3.81231 x10 <sup>-6</sup>  | -13.61 |
| 656 | Q8WVM0 | TFB1M     | Dimethyladenosine transferase 1, mitochondrial             | EVAERLAANTGS<br>KQR               | 12.584±1.0<br>2 | 0.000±0.00 | 2.84467 x10 <sup>-5</sup>  | -13.62 |
| 657 | Q2M3X9 | ZNF674    | Zinc finger protein 674                                    | FLWQA AFIGKETL<br>K               | 12.575±0.6<br>2 | 0.000±0.00 | 3.96616 x10 <sup>-6</sup>  | -13.62 |
| 658 | Q5TD97 | FHL5      | Four and a half LIM domains protein 5                      | CSVSLVGKGF LTQ<br>NKEIFCQK        | 12.829±3.3<br>2 | 0.000±0.00 | 2.58921 x10 <sup>-3</sup>  | -13.62 |
| 659 | Q9HCG7 | GBA2      | Non-lysosomal glucosylceramidase                           | GQVHYRR                           | 12.617±1.1<br>9 | 0.000±0.00 | 5.2517 x10 <sup>-5</sup>   | -13.62 |
| 660 | Q14112 | NID2      | Nidogen-2                                                  | ENLLEHYGGTPR                      | 12.682±1.8<br>4 | 0.000±0.00 | 2.82042 x10 <sup>-4</sup>  | -13.62 |
| 661 | Q8IZA0 | KIAA0319L | Dyslexia-associated protein KIAA0319-like protein          | EEINKPPIAK                        | 12.630±1.2<br>1 | 0.000±0.00 | 5.5168 x10 <sup>-5</sup>   | -13.62 |
| 662 | Q8N1E6 | FBXL14    | F-box/LRR-repeat protein 14                                | SAAEGCLGLEQLT<br>LQDCQKLTDSL<br>K | 12.646±1.0<br>3 | 0.000±0.00 | 2.86383 x10 <sup>-5</sup>  | -13.62 |
| 663 | O94875 | SORBS2    | Sorbin and SH3 domain-containing protein 2                 | AISFKNGWQMAR                      | 12.655±0.2<br>7 | 0.000±0.00 | 1.39548 x10 <sup>-7</sup>  | -13.63 |
| 664 | Q9NX62 | BPNT2     | Golgi-resident adenosine 3',5'-bisphosphate 3'-phosphatase | KLPDLEKTGHK                       | 12.674±0.4<br>8 | 0.000±0.00 | 1.41738 x10 <sup>-6</sup>  | -13.63 |
| 665 | O75794 | CDC123    | Cell division cycle protein 123 homolog                    | KWCELIPGAEFR                      | 12.795±2.0<br>0 | 0.000±0.00 | 3.751 x10 <sup>-4</sup>    | -13.63 |
| 666 | Q8NE31 | FAM13C    | Protein FAM13C                                             | FEEKFEQEKK                        | 12.720±0.2<br>7 | 0.000±0.00 | 1.27956 x10 <sup>-7</sup>  | -13.63 |
| 667 | Q16719 | KYNU      | Kynureninase                                               | DVFQELEK                          | 12.739±0.2      | 0.000±0.00 | 7.9362 x10 <sup>-8</sup>   | -13.64 |

|     |        |           |                                                      |                             |                 |            |                            |        |
|-----|--------|-----------|------------------------------------------------------|-----------------------------|-----------------|------------|----------------------------|--------|
|     |        |           |                                                      |                             | 4               |            |                            |        |
| 668 | Q58FF6 | HSP90AB4P | Putative heat shock protein HSP 90-beta 4            | EDQTEYLEER                  | 12.739±0.0<br>4 | 0.000±0.00 | 5.05348 x10 <sup>-11</sup> | -13.64 |
| 669 | Q12860 | CNTN1     | Contactin-1                                          | ILALAPTFEMNPM<br>KKK        | 12.758±0.5<br>2 | 0.000±0.00 | 1.89234 x10 <sup>-6</sup>  | -13.64 |
| 670 | Q9UHC1 | MLH3      | DNA mismatch repair protein Mlh3                     | ACSETEESNTCCS<br>DWQR       | 12.769±0.2<br>7 | 0.000±0.00 | 1.38882 x10 <sup>-7</sup>  | -13.64 |
| 671 | Q8IZ40 | RCOR2     | REST corepressor 2                                   | EKHGYNIEQALG<br>MLLWHKHDVEK | 12.814±0.5<br>9 | 0.000±0.00 | 2.98206 x10 <sup>-6</sup>  | -13.64 |
| 672 | Q9UN88 | GABRQ     | Gamma-aminobutyric acid receptor subunit theta       | CDTNSTWGLNDD<br>ELMAHGQEK   | 12.899±1.6<br>7 | 0.000±0.00 | 1.80503 x10 <sup>-4</sup>  | -13.65 |
| 673 | P11908 | PRPS2     | Ribose-phosphate pyrophosphokinase 2                 | ENIAEWK                     | 12.896±1.1<br>6 | 0.000±0.00 | 4.24057 x10 <sup>-5</sup>  | -13.65 |
| 674 | Q9H0I2 | ENKD1     | Enkurin domain-containing protein 1                  | ALDTTAPR                    | 12.953±1.4<br>4 | 0.000±0.00 | 9.89531 x10 <sup>-5</sup>  | -13.65 |
| 675 | P55160 | NCKAP1L   | Nck-associated protein 1-like                        | EVSRAFHLN                   | 13.001±1.9<br>3 | 0.000±0.00 | 3.06263 x10 <sup>-4</sup>  | -13.66 |
| 676 | P0CJ78 | ZNF865    | Zinc finger protein 865                              | CELCGKVFQYQPS<br>LTR        | 12.986±1.6<br>8 | 0.000±0.00 | 1.80058 x10 <sup>-4</sup>  | -13.66 |
| 677 | Q09428 | ABCC8     | ATP-binding cassette sub-family C member 8           | AEIPWRACAK                  | 12.925±0.4<br>4 | 0.000±0.00 | 8.78339 x10 <sup>-7</sup>  | -13.66 |
| 678 | C9JQI7 | TMEM232   | Transmembrane protein 232                            | EHPVSEIPMFYP<br>DFFTKADK    | 12.964±1.0<br>3 | 0.000±0.00 | 2.6443 x10 <sup>-5</sup>   | -13.66 |
| 679 | P78314 | SH3BP2    | SH3 domain-binding protein 2                         | DPLCPRR                     | 13.003±1.3<br>9 | 0.000±0.00 | 8.50862 x10 <sup>-5</sup>  | -13.66 |
| 680 | Q8NCM2 | KCNH5     | Potassium voltage-gated channel subfamily H member 5 | DITLFKQPIEDDST<br>K         | 13.079±2.1<br>4 | 0.000±0.00 | 4.54537 x10 <sup>-4</sup>  | -13.66 |
| 681 | Q15042 | RAB3GAP1  | Rab3 GTPase-activating protein catalytic subunit     | CEQEEK                      | 12.976±0.6<br>3 | 0.000±0.00 | 3.61007 x10 <sup>-6</sup>  | -13.66 |
| 682 | Q8TF46 | DIS3L     | DIS3-like exonuclease 1                              | EVTKSVEEAQLA<br>QEVK        | 13.117±2.1<br>3 | 0.000±0.00 | 4.36438 x10 <sup>-4</sup>  | -13.67 |
| 683 | Q8NAF0 | ZNF579    | Zinc finger protein 579                              | ASGARNSAK                   | 13.162±2.2<br>5 | 0.000±0.00 | 5.3709 x10 <sup>-4</sup>   | -13.67 |
| 684 | Q14525 | KRT33B    | Keratin, type I cuticular Ha3-II                     | DNAELENLIRER                | 13.079±0.6<br>7 | 0.000±0.00 | 4.47707 x10 <sup>-6</sup>  | -13.67 |
| 685 | Q96IU2 | ZBED3     | Zinc finger BED domain-containing protein 3          | DGCVITKVLL                  | 13.574±4.4<br>9 | 0.000±0.00 | 6.37012 x10 <sup>-3</sup>  | -13.68 |
| 686 | Q9BYN8 | MRPS26    | 28S ribosomal protein S26, mitochondrial             | IARLRQEER                   | 13.276±2.5<br>3 | 0.000±0.00 | 8.07613 x10 <sup>-4</sup>  | -13.68 |

|     |        |           |                                                              |                            |                 |            |                           |        |
|-----|--------|-----------|--------------------------------------------------------------|----------------------------|-----------------|------------|---------------------------|--------|
| 687 | Q8N0S2 | SYCE1     | Synaptonemal complex central element protein 1               | AEKAGGQDTSSQ<br>K          | 13.150±0.2<br>3 | 0.000±0.00 | 5.89877 x10 <sup>-8</sup> | -13.68 |
| 688 | Q08722 | CD47      | Leukocyte surface antigen CD47                               | AVEEPLNAFK                 | 13.444±2.5<br>2 | 0.000±0.00 | 7.60043 x10 <sup>-4</sup> | -13.70 |
| 689 | Q9BT92 | TCHP      | Trichoplein keratin filament-binding protein                 | ELARREK                    | 13.278±0.3<br>5 | 0.000±0.00 | 3.09753 x10 <sup>-7</sup> | -13.70 |
| 690 | Q9UM73 | ALK       | ALK tyrosine kinase receptor                                 | GSFLLNNTSADSK<br>HTILSPWMR | 13.403±1.3<br>9 | 0.000±0.00 | 7.53319 x10 <sup>-5</sup> | -13.70 |
| 691 | A8MUP6 | GSG1L2    | Germ cell-specific gene 1-like protein 2                     | DNSSNGR                    | 13.366±0.4<br>7 | 0.000±0.00 | 1.03433 x10 <sup>-6</sup> | -13.71 |
| 692 | Q6ZV80 | LINC02898 | Putative uncharacterized protein LINC02898                   | HTLSQVPNK                  | 13.398±0.1<br>0 | 0.000±0.00 | 1.69524 x10 <sup>-9</sup> | -13.71 |
| 693 | Q6IPR1 | ETFRF1    | Electron transfer flavoprotein regulatory factor 1           | NKDVKNPEK                  | 13.549±0.8<br>4 | 0.000±0.00 | 9.75442 x10 <sup>-6</sup> | -13.72 |
| 694 | Q4V328 | GRIPAP1   | GRIP1-associated protein 1                                   | ELHEDKKR                   | 13.778±1.9<br>1 | 0.000±0.00 | 2.36009 x10 <sup>-4</sup> | -13.74 |
| 695 | P35250 | RFC2      | Replication factor C subunit 2                               | FALACNASDKIIEP<br>IQSR     | 13.745±1.3<br>3 | 0.000±0.00 | 5.67021 x10 <sup>-5</sup> | -13.74 |
| 696 | Q9H8M5 | CNNM2     | Metal transporter CNNM2                                      | EKLLEMLR                   | 13.757±1.0<br>1 | 0.000±0.00 | 1.90565 x10 <sup>-5</sup> | -13.75 |
| 697 | Q9BZW8 | CD244     | Natural killer cell receptor 2B4                             | EKQSETSPK                  | 14.058±0.2<br>6 | 0.000±0.00 | 7.3797 x10 <sup>-8</sup>  | -13.78 |
| 698 | Q9GZQ3 | COMMD5    | COMM domain-containing protein 5                             | CERRLQD                    | 14.190±1.1<br>5 | 0.000±0.00 | 2.79662 x10 <sup>-5</sup> | -13.79 |
| 699 | P0CG13 | CHTF8     | Chromosome transmission fidelity protein 8<br>homolog        | AGGLAEWVLMEL<br>QGEIAR     | 14.489±2.5<br>8 | 0.000±0.00 | 6.29955 x10 <sup>-4</sup> | -13.81 |
| 700 | Q8TEK3 | DOT1L     | Histone-lysine N-methyltransferase, H3 lysine-79<br>specific | AGAATVK                    | 14.377±0.8<br>4 | 0.000±0.00 | 7.68807 x10 <sup>-6</sup> | -13.81 |
| 701 | P01236 | PRL       | Prolactin                                                    | IDNYLKLLK                  | 14.396±1.1<br>6 | 0.000±0.00 | 2.79933 x10 <sup>-5</sup> | -13.81 |
| 702 | Q96NT0 | CCDC115   | Coiled-coil domain-containing protein 115                    | QLEPGAA                    | 16.111±2.5<br>7 | 0.000±0.00 | 4.09266 x10 <sup>-4</sup> | -13.96 |
| 703 | Q9P2C4 | TMEM181   | Transmembrane protein 181                                    | ACSELRHMPYVD<br>LR         | 16.259±2.3<br>6 | 0.000±0.00 | 2.80565 x10 <sup>-4</sup> | -13.98 |
| 704 | P10747 | CD28      | T-cell-specific surface glycoprotein CD28                    | RPGPTRK                    | 16.462±3.4<br>7 | 0.000±0.00 | 1.19027 x10 <sup>-3</sup> | -13.99 |
| 705 | Q8IWL3 | HSCB      | Iron-sulfur cluster co-chaperone protein HscB                | TLLAPLSR                   | 17.629±0.0<br>9 | 0.000±0.00 | 3.6599 x10 <sup>-10</sup> | -14.11 |

<sup>a</sup>For log<sub>2</sub>(fold change) ARID1A/empty vector calculations, an intensity value of 0 was set to 0.001 to prevent division by 0. n/a, not applicable; ARID1A, AT-rich interacting domain-containing protein 1A; TBC1, Tre-2/USP6, BUB2, Cdc16; GRB2, growth factor receptor-bound protein-2; TARBP1, TAR RNA-Binding Protein 1; ABCB7, ATP Binding Cassette Subfamily B Member 7; C4orf50, Chromosome 4 Open Reading Frame 50; RNF135, Ring Finger Protein 135; BTK, Bruton Tyrosine Kinase; C1orf141, Chromosome 1 Open Reading Frame 141; FAM118A, Family With Sequence Similarity 118 Member A; FAM227B, Family With Sequence Similarity 227 Member B; FAM20A, Family With Sequence Similarity 20, Member A; MNT, MAX Network Transcriptional Repressor; RMND5A, Required For Meiotic Nuclear Division 5 Homolog A; ITK/TSK, Interleukin-2-inducible T-cell kinase; FAM227A, Family With Sequence Similarity 227, Member A; ZNRF3, Zinc And Ring Finger 3; RNF13, Ring Finger Protein 13; TPTE, Transmembrane Phosphatase With Tensin Homology; MAB21L1, Mab-21 Like 1; TFG, Trafficking From ER To Golgi Regulator; ICK, Ciliogenesis Associated Kinase 1; MCM8, Minichromosome Maintenance 8 Homologous Recombination Repair Factor; FAM98B, Family With Sequence Similarity 98 Member B; BACH2, BTB Domain And CNC Homolog 2; RUSC1, RUN And SH3 Domain Containing 1; PRRC1, Proline Rich Coiled-Coil 1; TIAM2, TIAM Rac1 Associated GEF 2; NALCN, Sodium leak channel; Pcf11, Pre-mRNA cleavage complex 2 protein; NAF1, Nuclear Assembly Factor 1 Ribonucleoprotein; MINDY-1, MINDY Lysine 48 Deubiquitinase 1; RNF4, Ring Finger Protein 4; GPCPD1, Glycerophosphocholine Phosphodiesterase 1; BRWD1-AS2, BRWD1 Antisense RNA 2; TOM1, Target Of Myb1; ZDHHC4, Zinc Finger DHHC-Type Palmitoyltransferase 4; APCDD1, APC Down-Regulated 1; ACSBG2, Acyl-CoA Synthetase Bubblegum Family Member 2; SCO1, Synthesis Of Cytochrome C Oxidase 1; ABCB9, ATP Binding Cassette Subfamily B Member 9; GRK7, G Protein-Coupled Receptor Kinase 7; MYSM1, Myb Like, SWIRM And MPN Domains 1; UNC5D, Unc-5 Netrin Receptor D; CBLL2, Cbl Proto-Oncogene Like 2; FAM13C, Family With Sequence Similarity 13 Member C; LINC02898, Long Intergenic Non-Protein Coding RNA 2898; HscB, HscB Mitochondrial Iron-Sulfur Cluster Cochaperone.

**Table SII.** Significantly enriched GO terms and KEGG pathways of altered proteins in ARID1A-overexpressing SW48 cells.

| A, GO biological process |                                                                         |                                                                                                                                                                                               |            |         |                 |
|--------------------------|-------------------------------------------------------------------------|-----------------------------------------------------------------------------------------------------------------------------------------------------------------------------------------------|------------|---------|-----------------|
| ID                       | Term                                                                    | Genes                                                                                                                                                                                         | Gene ratio | P-value | Fold enrichment |
| GO:0010811               | Positive regulation of cell-substrate adhesion                          | ECM2, CCDC80, ITGA3, ABI3BP, AGR2, VWC2, EMILIN1                                                                                                                                              | 0.98       | 0.001   | 5.89            |
| GO:0016191               | Synaptic vesicle uncoating                                              | GAK, SYNJ1, DNAJC6, SH3GL2                                                                                                                                                                    | 0.56       | 0.001   | 17.31           |
| GO:0016055               | Wnt signaling pathway                                                   | APC2, FBXW11, WNT5A, CSNK1D, APCDD1, SENP2, MESD, HIC1, SFRP4, ZNRF3, CCND1, OTULIN, LEO1, ZBED3                                                                                              | 2.11       | 0.005   | 2.33            |
| GO:0006629               | Lipid metabolic process                                                 | MTMR3, MTPP, EPHX3, UMOD, PTPN22, GDPD4, SREBF2, RIDA, ERG28, BDH1, ACOX1, DPEP2, PLIN1, PRLH, PLCD3, BCAT2                                                                                   | 2.25       | 0.005   | 2.24            |
| GO:0060750               | Epithelial cell proliferation involved in mammary gland duct elongation | MED1, WNT5A, ESR1                                                                                                                                                                             | 0.42       | 0.006   | 22.72           |
| GO:1900264               | Positive regulation of DNA-directed DNA polymerase activity             | RFC5, RFC3, CHTF8, RFC2                                                                                                                                                                       | 0.56       | 0.008   | 9.32            |
| GO:0006516               | Glycoprotein catabolic process                                          | MANBA, FBXO17, PPP6R3, FBXO6                                                                                                                                                                  | 0.56       | 0.010   | 8.66            |
| GO:0016180               | Small nuclear RNAs (snRNAs) processing                                  | INTS12, INTS3, INTS5, INTS4                                                                                                                                                                   | 0.56       | 0.012   | 8.08            |
| GO:0032508               | DNA duplex unwinding                                                    | RFC5, RFC3, CHTF8, MCM8, RFC2, CHD1L, RAD54B                                                                                                                                                  | 0.98       | 0.013   | 3.59            |
| GO:0045444               | Fat cell differentiation                                                | NR4A1, MED1, TTC8, NR4A3, CCND1, PRLH, GDF6, SENP2                                                                                                                                            | 1.12       | 0.014   | 3.11            |
| GO:0051056               | Regulation of small GTPase mediated signal transduction                 | NET1, TIAM2, ARHGAP44, PLEKHG4, ARHGAP20, CHN1, TAGAP, ARHGAP28, ARHGEF5, FGD2                                                                                                                | 1.40       | 0.017   | 2.55            |
| GO:0030433               | Ubiquitin-dependent ERAD pathway                                        | CALR3, FBXO17, DNAJB12, UBQLN1, UBE4A, UMOD, FBXO6, USP19                                                                                                                                     | 1.12       | 0.017   | 2.99            |
| GO:0043066               | Negative regulation of apoptotic process                                | CERKL, SCX, AURKA, RPS6KA3, MAEL, FFAR4, PRAME, NCKAP1L, ASIC2, TGM2, NTRK1, MED1, ANGPT4, SERPINB2, WNT5A, PAX4, PRAMEF20, CAPN13, HCK, GCLC, PROC, CD40LG, RPS6KB1, MDM2, PPT1, CD28, IL6ST | 3.79       | 0.024   | 1.57            |
| GO:0045109               | Intermediate filament organization                                      | KRT33B, KRT17, KRT3, KRT15, KRT7, KRT77, GFAP                                                                                                                                                 | 0.98       | 0.024   | 3.12            |
| GO:0006511               | Ubiquitin-dependent protein catabolic                                   | APC2, HACE1, RNF13, USP21, UBE4A, RC3H1, NEDD4L, NTAN1, FBXO11, FBXL14, USP19, RNF168, PSMD9, ZNRF3,                                                                                          | 2.39       | 0.026   | 1.82            |

|                          |                                                                        |                                                                                                                                                                           |            |         |                 |
|--------------------------|------------------------------------------------------------------------|---------------------------------------------------------------------------------------------------------------------------------------------------------------------------|------------|---------|-----------------|
|                          | process                                                                | MDM2, UBQLN1                                                                                                                                                              |            |         |                 |
| GO:0044267               | Cellular protein metabolic process                                     | MMP13, FBXO17, KLK3, FBXO6                                                                                                                                                | 0.56       | 0.030   | 5.77            |
| GO:0009134               | Nucleoside diphosphate catabolic process                               | ENTPD2, ENTPD6, ENTPD7                                                                                                                                                    | 0.42       | 0.033   | 10.1            |
| GO:0006013               | Mannose metabolic process                                              | MAN2B2, PMM2, MAN2C1                                                                                                                                                      | 0.42       | 0.033   | 10.1            |
| GO:1903078               | Positive regulation of protein localization to plasma membrane         | ITGA3, STAC2, AGR2, STX4, AKAP5, PLS1                                                                                                                                     | 0.84       | 0.034   | 3.3             |
| GO:0034243               | Regulation of transcription elongation from RNA polymerase II promoter | INTS12, INTS3, INTS5, INTS4                                                                                                                                               | 0.56       | 0.034   | 5.51            |
| GO:0038083               | Peptidyl-tyrosine autophosphorylation                                  | NTRK1, ALK, ITK, BTK                                                                                                                                                      | 0.56       | 0.034   | 5.51            |
| GO:0006468               | Protein phosphorylation                                                | DYRK2, MAST1, CAMK2A, AURKA, RABGEF1, CCND1, GRK7, IKBKE, MAP3K5, PAK4, NTRK1, TNK1, WNT5A, ADAM10, CSNK1D, KSR2, GAK, HCK, TAOK1, NEK10, BTK, TAF7, BMPR1B, CILK1, CDKL1 | 3.51       | 0.035   | 1.55            |
| GO:0045597               | Positive regulation of cell differentiation                            | RPS6KA3, FGF8, PPP1R13L, PAX4, ARID2, ARID1B                                                                                                                              | 0.84       | 0.042   | 3.13            |
| GO:0007130               | Synaptonemal complex assembly                                          | SYCE2, SYCE1, HORMAD1, MLH3                                                                                                                                               | 0.56       | 0.043   | 5.05            |
| GO:0035556               | Intracellular signal transduction                                      | GUCY1A2, ITK, PRPF38B, WSB1, MAST1, ACOT11, ADCY4, KSR2, NET1, RP1L1, RPS6KA3, TAOK1, RPS6KA2, CHN1, STAC2, BTK, TP53TG5, PLCD3, CILK1, ARHGEF5, PLCD1, PAK4              | 3.23       | 0.043   | 1.55            |
| GO:0007140               | Male meiosis                                                           | MAEL, SPDYA, MLH3, BRDT                                                                                                                                                   | 0.56       | 0.048   | 4.85            |
| GO:0032465               | Regulation of cytokinesis                                              | KLHL9, SH3GLB1, CETN2, ENTR1, AURKA                                                                                                                                       | 0.70       | 0.049   | 3.61            |
| GO:0046685               | Response to arsenic-containing substance                               | GCLC, SERPINF1, RNF4                                                                                                                                                      | 0.42       | 0.049   | 8.26            |
| GO:0009313               | Oligosaccharide catabolic process                                      | MANBA, MAN2B2, MAN2C1                                                                                                                                                     | 0.42       | 0.049   | 8.26            |
| B, GO cellular component |                                                                        |                                                                                                                                                                           |            |         |                 |
| ID                       | Term                                                                   | Genes                                                                                                                                                                     | Gene ratio | P-value | Fold enrichment |
| GO:0005829               | Cytosol                                                                | DYNC2I2, TESK1, PKD2L1, NADSYN1, GBA2, BACH2, RRP8,                                                                                                                       | 32.87      | 0.000   | 1.30            |

|            |             |                                                                                                                                                                                                                                                                                                                                                                                                                                                                                                                                                                                                                                                                                                                                                                                                                                                                                                                                                                                                                                                                                                                                                                                                                                                                                                                                                                                                                                                                                                                                                                                                                                                                                                              |       |       |      |
|------------|-------------|--------------------------------------------------------------------------------------------------------------------------------------------------------------------------------------------------------------------------------------------------------------------------------------------------------------------------------------------------------------------------------------------------------------------------------------------------------------------------------------------------------------------------------------------------------------------------------------------------------------------------------------------------------------------------------------------------------------------------------------------------------------------------------------------------------------------------------------------------------------------------------------------------------------------------------------------------------------------------------------------------------------------------------------------------------------------------------------------------------------------------------------------------------------------------------------------------------------------------------------------------------------------------------------------------------------------------------------------------------------------------------------------------------------------------------------------------------------------------------------------------------------------------------------------------------------------------------------------------------------------------------------------------------------------------------------------------------------|-------|-------|------|
|            |             | <p>CCT6B, RPS6KA3, PSMD9, RABGEF1, TFG, RUSC1, RPS6KA2, GOLGA1, SPATA24, ANKFY1, PLCE1, FBXO6, MLYCD, LGALS8, WSB1, COG5, KRT3, KRT7, CSNK1D, HCFC2, TIAM2, SULT2B1, ZFYVE16, CRYZL1, BTK, TXNIP, PI4K2A, CERKL, MTMR3, MTPP, NEDD4L, C9ORF78, PIK3R6, KRT33B, SEC14L2, AP5M1, NUP85, NCKAP1L, GSTT2B, ZBED3, PMM2, RAB3IP, TEX37, THAP11, NET1, ADI1, INTS5, PPT1, CD28, ITPA, ITK, ACY1, CETN2, DIS3L, KDM8, NKAP, HSCB, SHB, OSBPL10, GLT1D1, XPO4, IKBKE, APC2, GRIPAP1, SREBF2, COMMD5, GAK, RNF168, APBB1IP, HCK, PLCB3, PABPC3, HNRNPH2, PLIN1, ACSBG2, ARHGEF5, PHLPP2, GPS2, AKAP5, FGD2, RNF135, RIDA, SERTAD2, EXOSC8, CHN1, STX4, EMC8, PAK4, TRMT10A, RIC1, ELP2, SGSM1, AGBL5, KLHL9, TTC8, KRT17, KCNS3, TAOK1, KRT15, STAC2, OTULIN, PLCD3, MPHOSPH8, RAB3GAP1, GDA, NCF4, YARS2, ARHGAP44, CCND1, KMT5A, KPNA3, SH3GL2, MAP3K5, TGM2, SH3GLB1, GUCY1A2, PHYH, FBXW11, STX8, FBXO17, ACOT11, AIP, FBXO15, TSC1, KRT77, CHD1L, FBXO11, TOM1L1, ADAM17, DOK4, FRMD8, TIPRL, DPEP2, PPIH, SRSF5, KANK4, PFKFB4, DAPP1, CORO1A, ARHGAP20, SYCE1, ADGRG2, NLRP5, PLXNA1, MBP, TIA1, IFTAP, ARHGEF37, ATP8B2, GFPT2, ANKRD23, ARHGAP28, TRAPPC9, ESR1, GFAP, FBXO31, NR4A1, GCLC, SYNJ1, MDM2, SPIRE1, CNTROB, DRC1, MXD1, DYRK2, RNF13, MCM8, MAST1, PTPN22, C2ORF48, PITPNC1, TCHP, RO60, PPP1R13L, SNAPC2, KYNU, TAGAP, PPP6R3, MAN2C1, PLEKHG4, RBM18, ELAC1, PLA2G4A, ASMTL, TRAF2, VPS37A, BPGM, KSR2, GPCPD1, SENP2, ARID1B, TSN, PSRC1, SAPCD2, ACOX1, DNAJC6, ALDH1A1, MYH8, DNAJC9, EVL, CILK1, PRPS2, HSP90AB4P, DCTN1, CAMK2A, CXXC1, PARD6G, TPTE, USP19, AURKA, C15ORF39, VPS51, DNAJB4, UBQLN1, BPNT2, TCF7L1, USP21, FBXL14, TTC17, CCS, RPS6KB1, TNIP3, NT5C1A, GPD1L, PAXBP1</p> |       |       |      |
| GO:0005654 | Nucleoplasm | <p>GABPB2, SPPL2B, BACH2, RRP8, RPS6KA3, PSMD9, CCND1, RPS6KA2, SPATA24, KMT5A, ARID2, KPNA3, GEN1, MED1, SNRPN, CXADR, COG5, AIP, ZBTB34, CSNK1D, CHD1L, HCFC2, FBXO11, HIC1, PRPF4, FRMD8, DPEP2, PPIH, SRSF5, CDKL1, CERKL, MINDY1, FOXG1, NEDD4L, C9ORF78, SEC14L2, SYCE2, SYCE1, CHTF8, NUP85, PLXNA1, GSTT2B, ESRR, TOE1, ZBTB18, TIA1, NCAPH2, INTS3, CBX2,</p>                                                                                                                                                                                                                                                                                                                                                                                                                                                                                                                                                                                                                                                                                                                                                                                                                                                                                                                                                                                                                                                                                                                                                                                                                                                                                                                                       | 23.74 | 0.000 | 1.31 |

|            |                                  |                                                                                                                                                                                                                                                                                                                                                                                                                                                                                                                                                                                                                                                                                                                                                                                                                                                                                               |       |       |       |
|------------|----------------------------------|-----------------------------------------------------------------------------------------------------------------------------------------------------------------------------------------------------------------------------------------------------------------------------------------------------------------------------------------------------------------------------------------------------------------------------------------------------------------------------------------------------------------------------------------------------------------------------------------------------------------------------------------------------------------------------------------------------------------------------------------------------------------------------------------------------------------------------------------------------------------------------------------------|-------|-------|-------|
|            |                                  | ANKRD23, PMM2, ESR1, THAP11, NR4A1, NR4A3, MDM2, INTS5, SPDYA, SPIRE1, INTS4, MXD1, ITPA, INTS12, DYRK2, RNF13, MCM8, CETN2, KDM8, NKAP, HSCB, SHB, PHF6, MYSM1, PITPNC1, MED12, RO60, XPO4, SNAPC1, PPP1R13L, PCF11, SNAPC2, KYNU, PPP6R3, NELFB, MYBL2, MAN2C1, IKBKE, RBM5, RFC5, APC2, GRIPAP1, RFC3, MRPS26, RFC2, RBM18, ELAC1, PAX4, DARS2, TRAF2, VPS37A, SENP2, ETV4, ARID1B, MRPL46, GCNA, SREBF2, TSN, COMMD5, RNF168, PSRC1, SAPCD2, LUC7L3, HNRNPH2, NAF1, DNAJC9, ARHGEF5, BCAT2, PHLPP2, GTF3C2, ABRAXAS1, CAMK2A, DOT1L, CXXC1, FAAP24, GPS2, TMPRSS2, WDR20, MRPL58, RNF4, SPTY2D1, AURKA, MNT, RMND5A, POLR2B, SERTAD2, DNAJB4, BAHD1, EXOSC8, TRA2A, UBQLN1, LEO1, BPNT2, PRAME, CFAP20, TRDMT1, RUNX1T1, SRSF12, TRMT10A, MBD4, TCF7L1, USP21, CCDC59, ELP2, TRMT1, MCOLN1, YY1AP1, MLH3, USF1, RPS6KB1, MFAP1, CDKN2AIPNL, KANSL3, TAF7, FAM98B, MPHOSPH8, ZNF354C, GZF1 |       |       |       |
| GO:0031390 | Ctf18 RFC-like complex           | RFC5, RFC3, CHTF8, RFC2                                                                                                                                                                                                                                                                                                                                                                                                                                                                                                                                                                                                                                                                                                                                                                                                                                                                       | 0.56  | 0.001 | 17.53 |
| GO:0036064 | Ciliary basal body               | DYNC2I2, DCTN1, CETN2, CFAP70, RAB3IP, CSNK1D, AURKA, TTC8, TOGARAM1, ENTR1, BBOF1, GAS2L2, CFAP20, CILK1, ENKD1                                                                                                                                                                                                                                                                                                                                                                                                                                                                                                                                                                                                                                                                                                                                                                              | 2.11  | 0.001 | 2.72  |
| GO:0005614 | Interstitial matrix              | ECM2, CCDC80, ABI3BP, VWC2                                                                                                                                                                                                                                                                                                                                                                                                                                                                                                                                                                                                                                                                                                                                                                                                                                                                    | 0.56  | 0.006 | 10.23 |
| GO:0005884 | Actin filament                   | APC2, VPS18, HCK, INF2, TSC1, ACTL8, GAS2L2, CORO1A, PLS1                                                                                                                                                                                                                                                                                                                                                                                                                                                                                                                                                                                                                                                                                                                                                                                                                                     | 1.26  | 0.008 | 3.10  |
| GO:0005663 | DNA replication factor C complex | RFC5, RFC3, RFC2                                                                                                                                                                                                                                                                                                                                                                                                                                                                                                                                                                                                                                                                                                                                                                                                                                                                              | 0.42  | 0.010 | 18.41 |
| GO:0005881 | Cytoplasmic microtubule          | APC2, FBXW11, RAB3D, MAST1, TOGARAM1, MAPRE2, ENKD1                                                                                                                                                                                                                                                                                                                                                                                                                                                                                                                                                                                                                                                                                                                                                                                                                                           | 0.98  | 0.010 | 3.77  |
| GO:0045171 | Intercellular bridge             | ESRRA, APC2, PHLPP2, AGBL5, PPP1R13L, DCTN1, RBM18, NCAPH2, KICS2                                                                                                                                                                                                                                                                                                                                                                                                                                                                                                                                                                                                                                                                                                                                                                                                                             | 1.26  | 0.011 | 2.97  |
| GO:0005737 | Cytoplasm                        | DYNC2I2, TESK1, NADSYN1, RPS6KA3, PSMD9, TFG, RPS6KA2, SPATA24, FBXO6, MLYCD, SPA17, LGALS8, ACAD10, WSB1, CXADR, PRAMEF20, KRT7, CSNK1D, HCFC2, SULT2B1, SFRP4, ZFYVE19, BTK, TXNIP, CBLL2, CERKL, TBCEL, MTMR3, NEDD4L, SEC14L2, CYP2B6, PRRC1, SPATA5L1, CFAP65, GSTT2B, ZBED3, TOE1, HACE1, STK11IP, TPRG1, INTS3, PMM2, TEX37, NTAN1, NDUFAF6, ADI1, INTS5, ITPA, ACY1, MSTN, CCDC125, HSCB, CSAD,                                                                                                                                                                                                                                                                                                                                                                                                                                                                                       | 29.63 | 0.011 | 1.15  |

|            |                           |                                                                                                                                                                                                                                                                                                                                                                                                                                                                                                                                                                                                                                                                                                                                                                                                                                                                                                                                                                                                                                                                                                                                                                                     |      |       |      |
|------------|---------------------------|-------------------------------------------------------------------------------------------------------------------------------------------------------------------------------------------------------------------------------------------------------------------------------------------------------------------------------------------------------------------------------------------------------------------------------------------------------------------------------------------------------------------------------------------------------------------------------------------------------------------------------------------------------------------------------------------------------------------------------------------------------------------------------------------------------------------------------------------------------------------------------------------------------------------------------------------------------------------------------------------------------------------------------------------------------------------------------------------------------------------------------------------------------------------------------------|------|-------|------|
|            |                           | <p>CSRP2, XPO4, PCF11, NELFB, IKBKE, APC2, SERPINB2, TACR3, SREBF2, MLF2, GAK, HCK, PABPC3, FAM20A, PRMT9, ACSBG2, MAPRE2, ARHGEF5, TLR3, PHLPP2, CDC123, CCDC103, DOT1L, ADCY4, FGD2, RNF135, SCEL, RIDA, SERTAD2, EXOSC8, TP53TG5, PRAME, PRLH, EMC8, PAK4, SRSF12, GABBR2, ELP2, SORBS2, ACTL8, SGSM1, AGBL5, TAOK1, OTULIN, ETFBKMT, MPHOSPH8, PLCD1, RAB3GAP1, GZF1, MYLK2, NCF4, ARHGAP44, FGF8, CCND1, MAEL, TNFRSF8, TGM5, KPNA3, SH3GL2, MAP3K5, PLS1, SH3GLB1, GUCY1A2, SNRPN, FBXO17, ACOT11, AIP, ADAM10, UBE4A, TSC1, FBXO11, TOM1L1, ADAM17, DOK4, PPIH, BBOF1, KANK4, CDKL1, ANKRD16, FOXO6, CORO1A, KLC3, ESPNL, GRK7, NLRP5, ZC3H14, GAS2L2, ESRRA, TIA1, ARHGEF37, TNK1, ARHGAP28, TRAPPC9, ESR1, CORO2B, DNAJC17, GFAP, MFHAS1, NR4A1, MDM2, CNTROB, RTP3, DYRK2, RNF13, CPQ, MAST1, PTPN22, MYSM1, PITPNC1, TCHP, RO60, KYNU, PPP6R3, GRIFIN, PLEKHG4, SUN1, PLA2G4A, DARS2, KSR2, GPCPD1, ARID1B, TSN, C12ORF4, ARL4D, PSRC1, DNAJC6, ALDH1A1, MYH8, PFDN1, SPOPL, BPI, NAF1, DNAJC9, EVL, CILK1, PRPS2, DCTN1, CAMK2A, PARD6G, RNF4, RMND5A, DDT, UBQLN1, CFAP20, TRDMT1, SKOR2, USP21, FBXL14, YY1AP1, TTC17, CAPN13, CCS, RPS6KB1, NT5C1A, TAF7, FAM98B</p> |      |       |      |
| GO:0005794 | Golgi apparatus           | <p>GALNT13, CPQ, MAST1, XYLT2, ZDHHC4, GARIN3, RUSC1, GOLGA1, APC2, COG5, ENTPD6, ENTPD7, PLA2G4A, ADAM10, CSNK1D, SORCS1, GAK, HCK, NPC1, FAM20A, CERKL, ASAH2, MTTP, NEDD4L, ADRB2, FGD2, FUT7, PRRC1, VPS51, NLRP5, BPNT2, SCAP, PRAME, KIAA0319L, EMC8, EXTL3, PAK4, GALNT7, GALNT6, ATP8B2, RAB3IP, TRAPPC9, MCOLN1, ESR1, SGSM1, CD40LG, PROC, KCNS3, PPT1, RAB3GAP1</p>                                                                                                                                                                                                                                                                                                                                                                                                                                                                                                                                                                                                                                                                                                                                                                                                      | 7.02 | 0.025 | 1.36 |
| GO:0043235 | Receptor complex          | <p>GABRQ, ALK, NTRK1, VIPR1, ITGA3, MTTP, PKD2L1, MST1R, ADRB2, MCOLN1, IL3RA, IL13RA2, BMPR1B, IL6ST</p>                                                                                                                                                                                                                                                                                                                                                                                                                                                                                                                                                                                                                                                                                                                                                                                                                                                                                                                                                                                                                                                                           | 1.97 | 0.028 | 1.96 |
| GO:0035579 | Specific granule membrane | <p>CD93, CMTM6, ADAM10, DEGS1, MCEMP1, CD47, LAMTOR1, LAIR1</p>                                                                                                                                                                                                                                                                                                                                                                                                                                                                                                                                                                                                                                                                                                                                                                                                                                                                                                                                                                                                                                                                                                                     | 1.12 | 0.029 | 2.70 |
| GO:0035371 | Microtubule plus-end      | <p>DCTN1, MAST1, GAS2L2, MAPRE2</p>                                                                                                                                                                                                                                                                                                                                                                                                                                                                                                                                                                                                                                                                                                                                                                                                                                                                                                                                                                                                                                                                                                                                                 | 0.56 | 0.042 | 5.11 |
| GO:0005783 | Endoplasmic reticulum     | <p>CERKL, CALR3, VKORC1L1, RNF13, CPQ, STAU2, MTTP, ATP2A3, UMOD, PKD2L1, MESD, HACD2, AGPAT4, ZDHHC4, ERMP1, UBQLN1, UGT1A5, AGR2, SCAP, PCDHA2, EMC8, EXTL3, TGM2, HACE1, PNPLA7, USP21, CCDC115, STX8,</p>                                                                                                                                                                                                                                                                                                                                                                                                                                                                                                                                                                                                                                                                                                                                                                                                                                                                                                                                                                       | 6.88 | 0.043 | 1.31 |

|                          |                           | DNAJB12, PLA2G4A, TAP1, EPHX3, MBOAT4, TRAPPC9, ELOVL7, SREBF2, TSN, SULT2B1, HADHB, ERG28, PROC, NPC1, STIM1, TMEM259, DEGS1, PLIN1, FAM20A, LDAH                                                                                                                                                                                                                                                                                                                                                                                                                                                                                                                                                                                                                                                                                                                                                                                    |            |         |                 |
|--------------------------|---------------------------|---------------------------------------------------------------------------------------------------------------------------------------------------------------------------------------------------------------------------------------------------------------------------------------------------------------------------------------------------------------------------------------------------------------------------------------------------------------------------------------------------------------------------------------------------------------------------------------------------------------------------------------------------------------------------------------------------------------------------------------------------------------------------------------------------------------------------------------------------------------------------------------------------------------------------------------|------------|---------|-----------------|
| GO:0005764               | Lysosome                  | VPS18, MANBA, CPQ, CCDC115, KICS2, ABCB9, ADRB2, MCOLN1, GFAP, TOM1L1, CHIT1, HCK, AP5M1, NPC1, MAN2B2, PPT1, LAMTOR1                                                                                                                                                                                                                                                                                                                                                                                                                                                                                                                                                                                                                                                                                                                                                                                                                 | 2.39       | 0.048   | 1.68            |
| GO:0015630               | Microtubule cytoskeleton  | ESRRA, APC2, AGBL5, PSRC1, RUSC1, DCTN1, TAOK1, TEK5, MAPRE2, KANK4, ENKD1, AURKA                                                                                                                                                                                                                                                                                                                                                                                                                                                                                                                                                                                                                                                                                                                                                                                                                                                     | 1.69       | 0.048   | 1.93            |
| C, GO molecular function |                           |                                                                                                                                                                                                                                                                                                                                                                                                                                                                                                                                                                                                                                                                                                                                                                                                                                                                                                                                       |            |         |                 |
| ID                       | Term                      | Genes                                                                                                                                                                                                                                                                                                                                                                                                                                                                                                                                                                                                                                                                                                                                                                                                                                                                                                                                 | Gene ratio | P-value | Fold enrichment |
| GO:0046872               | Metal ion binding         | GALNT13, CPNE5, TESK1, XYLT2, ZFP30, ZNF329, ANKFY1, ZNF569, ZNF844, PLCE1, TGM5, ARID2, TGM2, VPS18, ZNF680, ZFP2, ENTPD7, RC3H1, ADAM10, ZNF10, TAP1, ZBTB34, HIC1, ACAP3, ADAM17, ZFYVE16, STIM1, ZFYVE19, ZSCAN21, DPEP2, BTK, CBLL2, ZNF674, MTMR3, ZNF23, ZBTB5, C2, ZNF429, AMZ2, ZNF546, ZC3H14, ZBED3, TOE1, ZBTB18, PMM2, THAP12, ZNF726P1, ESR1, SLC6A5, MAN2B2, COL9A1, MDM2, BMPR1B, ZNF136, ITPA, LHX9, CALR3, INTS12, ITK, RNF13, ACY1, CPQ, KDM8, ATP2A3, HSCB, FHL5, ZFP82, PHF6, MYSM1, ADAMTS4, RO60, CSRP2, ZNF528, ZNF649, ITGAX, MAN2C1, RBM5, ZSCAN5A, ITGA3, ELAC1, TRAF2, KSR2, MMEL1, ZFP90, RNF168, NDUFS7, ZNF878, ZNF114, PHLPP2, CAMK2A, ADCY4, CXXC1, ZNF3, GDPD4, USP19, FGD2, RNF135, SCEL, RMND5A, ERMP1, ZNRF3, POLR2B, CHN1, BPNT2, ZNF865, EXTL3, RUNX1T1, GALNT7, ZNF100, GALNT6, USP21, DMRT2, ZNF181, TRMT1, ZNF33A, CCS, ZNF618, MAB21L1, STAC2, NEK10, ZNF735, ZNF579, PLCD3, ZNF354C, GZF1 | 17.56      | 0.000   | 1.35            |
| GO:0030246               | Carbohydrate binding      | GALNT7, PRPS2, GRIFIN, CALR3, GALNT6, GALNT13, CD93, SIGLEC12, SIGLEC10, CSAD, MRC2, CLEC2A, MAN2B2, COL9A1, CNTN1, FBXO6, MAN2C1, LGALS8                                                                                                                                                                                                                                                                                                                                                                                                                                                                                                                                                                                                                                                                                                                                                                                             | 2.53       | 0.001   | 2.58            |
| GO:0003689               | DNA clamp loader activity | RFC5, RFC3, CHTF8, RFC2                                                                                                                                                                                                                                                                                                                                                                                                                                                                                                                                                                                                                                                                                                                                                                                                                                                                                                               | 0.56       | 0.003   | 12.87           |
| GO:0005515               | Protein binding           | GABPB2, TESK1, SCX, BACH2, RRP8, PSMD9, RABGEF1, TFG, ANKFY1, PLCE1, VPS18, MED1, CXADR, WSB1, STARD7, TAAR9, SERPINF1, ZNF10, RC3H1, MCEMP1, HCFC2, SULT2B1, ZFYVE16, SCO1, ZFYVE19, ZSCAN21, TXNIP, PI4K2A, MTMR3, ABCB7, NEDD4L, ZNF23, C9ORF78, ABCB9, HACD2, C2, NUP85, NCKAP1L, CFAP65, KIAA0319L,                                                                                                                                                                                                                                                                                                                                                                                                                                                                                                                                                                                                                              | 65.73      | 0.004   | 1.07            |

|  |  |                                                                                                                                                                                                                                                                                                                                                                                                                                                                                                                                                                                                                                                                                                                                                                                                                                                                                                                                                                                                                                                                                                                                                                                                                                                                                                                                                                                                                                                                                                                                                                                                                                                                                                                                                                                                                                                                                                                                                                                                                                                                                        |  |  |  |
|--|--|----------------------------------------------------------------------------------------------------------------------------------------------------------------------------------------------------------------------------------------------------------------------------------------------------------------------------------------------------------------------------------------------------------------------------------------------------------------------------------------------------------------------------------------------------------------------------------------------------------------------------------------------------------------------------------------------------------------------------------------------------------------------------------------------------------------------------------------------------------------------------------------------------------------------------------------------------------------------------------------------------------------------------------------------------------------------------------------------------------------------------------------------------------------------------------------------------------------------------------------------------------------------------------------------------------------------------------------------------------------------------------------------------------------------------------------------------------------------------------------------------------------------------------------------------------------------------------------------------------------------------------------------------------------------------------------------------------------------------------------------------------------------------------------------------------------------------------------------------------------------------------------------------------------------------------------------------------------------------------------------------------------------------------------------------------------------------------------|--|--|--|
|  |  | <p>TOE1, HACE1, TPRG1, NCAPH2, PMM2, RAB3IP, THAP12, TEX37, GRIN2C, THAP11, ADI1, PPT1, ZNF136, ITK, DIS3L, KDM8, SHB, PHF6, OSBPL10, MRC2, MED12, CSRP2, NELFB, DLGAP2, IKBKE, APC2, BRD3, FCRL2, ZSCAN5A, TACR3, ELOVL7, CDYL2, RNF168, APBB1IP, HADHB, PLCB3, RIPPLY3, INF2, PLIN1, ZNF114, PHLPP2, STAU2, ADCY4, WDR20, GPS2, FGD2, RNF135, FSTL5, RIDA, ERMP1, CHN1, LEO1, AGR2, STX4, TP53TG5, PRAME, ANKRD52, EXTL3, RUNX1T1, ZNF100, TRMT10A, MBD4, RIC1, TRMT1, DCBLD2, TAOK1, LAMTOR1, KLKB1, PLCD1, VKORC1L1, MYLK2, FAM13C, RAB3D, NCF4, ZNF329, ZNF569, KMT5A, IL13RA2, KPNA3, MAP3K5, SH3GLB1, SNRPN, STX8, FBXO17, FAM118A, AIP, TAP1, FBXO15, ZBTB34, CHD1L, FBXO11, HIC1, TOM1L1, ARMCX1, STIM1, FRMD8, IAPP, SRSF5, IL6ST, KANK4, PFKFB4, MINDY1, FOXO6, CORO1A, KLC3, ESPNL, MBP, IGFBP7, CD300LD, ESRR, ZBTB18, TIA1, IFTAP, ATP8B2, AMBN, GFPT2, TNK1, ANKRD23, TNFRSF10C, TRAPPC9, CORO2B, GFAP, FBXO31, MFHAS1, MDM2, SPIRE1, MENT, CNTROB, SERINC3, LHX9, ALK, RNF13, MCM8, PTPN22, FHL5, ADAMTS4, PPP1R13L, ZNF649, TAGAP, PPP6R3, ITGAX, EMILIN1, RFC5, PLEKHG4, RFC3, CR1, ITGA3, RFC2, ASMTL, TRAF2, VPS37A, BPGM, KSR2, TSN, ZFP90, ARL4D, NPC1, SAPCD2, IL3RA, NAF1, EVL, DNAJC9, MTFR2, PRPS2, GTF3C2, CXXC1, PARD6G, TPTE, MESD, ZNRF3, VPS51, POLR2B, BAHD1, DNAJB4, SH3BP2, UBQLN1, ETRF1, NTRK1, CCDC59, SYT14, SEMA4G, MCOLN1, FBXL14, MAB21L3, CLEC2A, MFAP1, CDKN2AIPNL, ZNF618, NT5C1A, MAB21L1, CD244, DYNC2I2, VIPR1, C10ORF67, PKD2L1, NADSYN1, ZDHHC4, RPS6KA3, RUSC1, RPS6KA2, SPATA24, GOLGA1, ZNF844, DENR, FBXO6, SPA17, LGALS8, MYOZ2, IQCF3, ENTPD2, COG5, KRT3, ZFP2, KRT7, CSNK1D, THEG, SFRP4, GAREM1, BTK, PREB, CBLL2, ATP6V0D2, TBCEL, FOXG1, MTPP, UMOD, KLK3, MST1R, APCDD1, ZBTB5, PIK3R6, KRT33B, MMTAG2, PPRC1, SPATA5L1, SCAP, N4BP3, CLHC1, SIGLEC12, INTS3, SIGLEC10, NTAN1, NET1, COL9A1, INTS5, CD28, SPDYA, CORO6, INTS4, ARMC12, RCOR2, INTS12, ACY1, MSTN, CETN2, CCDC125, NKAP, PRL, HSCB, TFB1M, C8A, XPO4, GRIPAP1, CCDC115, SORCS1, SREBF2, COMMMD5, MLF2, GAK, HCK, PABPC3, HNRNPH2, FAM20A, CD47, PRMT9,</p> |  |  |  |
|--|--|----------------------------------------------------------------------------------------------------------------------------------------------------------------------------------------------------------------------------------------------------------------------------------------------------------------------------------------------------------------------------------------------------------------------------------------------------------------------------------------------------------------------------------------------------------------------------------------------------------------------------------------------------------------------------------------------------------------------------------------------------------------------------------------------------------------------------------------------------------------------------------------------------------------------------------------------------------------------------------------------------------------------------------------------------------------------------------------------------------------------------------------------------------------------------------------------------------------------------------------------------------------------------------------------------------------------------------------------------------------------------------------------------------------------------------------------------------------------------------------------------------------------------------------------------------------------------------------------------------------------------------------------------------------------------------------------------------------------------------------------------------------------------------------------------------------------------------------------------------------------------------------------------------------------------------------------------------------------------------------------------------------------------------------------------------------------------------------|--|--|--|

|            |                                                                   |                                                                                                                                                                                                                                                                                                                                                                                                                                                                                                                                                                                                                                                                                                                                                                                                                                                                                                                                                                                                                                                                                                                                      |      |       |       |
|------------|-------------------------------------------------------------------|--------------------------------------------------------------------------------------------------------------------------------------------------------------------------------------------------------------------------------------------------------------------------------------------------------------------------------------------------------------------------------------------------------------------------------------------------------------------------------------------------------------------------------------------------------------------------------------------------------------------------------------------------------------------------------------------------------------------------------------------------------------------------------------------------------------------------------------------------------------------------------------------------------------------------------------------------------------------------------------------------------------------------------------------------------------------------------------------------------------------------------------|------|-------|-------|
|            |                                                                   | MAPRE2, ARHGEF5, TLR3, NPB, CCDC103, DOT1L, FAAP24, TMPRSS2, AKAP5, ZNF3, RAD54B, SCEL, MNT, SAMM50, SERTAD2, EXOSC8, EMC8, LAIR1, PAK4, GABRQ, GABBR2, MPP3, DMRT2, PCDHB14, SORBS2, ACTL8, MLH3, TTC8, ERG28, CD40LG, KRT17, KRT15, OTULIN, STAC2, VWC2, CFHR5, MPHOSPH8, RAB3GAP1, KLHL38, SPPL2B, YARS2, ARHGAP44, CCND1, TRAPPC14, TEKT5, TGM5, ARID2, SH3GL2, TMEM14C, TGM2, GUCY1A2, PHYH, CD93, FBXW11, WNT5A, ADAM10, UBE4A, TSC1, KRT77, PROCR, PRPF4, ADAM17, DOK4, TIPRL, PPIH, DAPP1, ADRB2, NALCN, NID2, SYCE2, SCUBE3, SYCE1, FUT7, GRK7, NLRP5, ASIC2, ZC3H14, GAS2L2, ENKD1, CBX2, ESR1, DNAJC17, NR4A1, GCLC, PROC, NR4A3, MAN2B2, CNTN1, DEGS1, BMPR1B, MXD1, DYRK2, RTP3, MAST1, ATP2A3, TNFAIP2, C2ORF48, MYSM1, PITPNC1, TCHP, SNAPC1, MYBL2, HORMAD1, RBM5, SUN1, OLIG3, TBC1D9, DARS2, SENP2, ETV4, ARID1B, GCNA, C12ORF4, PSRC1, NDUFS7, ALDH1A1, PFDN1, LUC7L3, SPOPL, ITGB1BP2, CILK1, ABRAXAS1, DCTN1, CAMK2A, RNF4, USP19, AGPAT4, AURKA, RMND5A, TRA2A, TOGARAM1, ENTR1, CCDC185, CFAP20, GALNT6, PTC1, TCF7L1, USP21, CMTM6, YY1AP1, USF1, TTC17, CCS, NOPCHAP1, RPS6KB1, TNIP3, BRMS1L, TAF7, FAM98B |      |       |       |
| GO:0017116 | Single-stranded DNA-dependent ATP-dependent DNA helicase activity | RFC5, RFC3, CHTF8, MCM8, RFC2                                                                                                                                                                                                                                                                                                                                                                                                                                                                                                                                                                                                                                                                                                                                                                                                                                                                                                                                                                                                                                                                                                        | 0.70 | 0.004 | 7.24  |
| GO:0051010 | Microtubule plus-end binding                                      | STIM1, DCTN1, FBXW11, MAST1, MAPRE2                                                                                                                                                                                                                                                                                                                                                                                                                                                                                                                                                                                                                                                                                                                                                                                                                                                                                                                                                                                                                                                                                                  | 0.70 | 0.006 | 6.58  |
| GO:0005085 | Guanyl-nucleotide exchange factor activity                        | PLEKHG4, GRIPAP1, PRPF38B, RIC1, ARHGEF37, RAB3IP, FGD2, NET1, TIAM2, RABGEF1, TAGAP, PLCE1, PREB, LAMTOR1, ARHGEF5, RAB3GAP1                                                                                                                                                                                                                                                                                                                                                                                                                                                                                                                                                                                                                                                                                                                                                                                                                                                                                                                                                                                                        | 2.25 | 0.018 | 1.95  |
| GO:0004711 | Ribosomal protein S6 kinase activity                              | RPS6KA3, RPS6KB1, RPS6KA2                                                                                                                                                                                                                                                                                                                                                                                                                                                                                                                                                                                                                                                                                                                                                                                                                                                                                                                                                                                                                                                                                                            | 0.42 | 0.022 | 12.41 |
| GO:0017124 | SH3 domain binding                                                | TOM1L1, ADAM17, SYNJ1, DNAJC6, SH3BP2, ADAM10, EVL, PTPN22, ITGB1BP2, AKAP5                                                                                                                                                                                                                                                                                                                                                                                                                                                                                                                                                                                                                                                                                                                                                                                                                                                                                                                                                                                                                                                          | 1.40 | 0.030 | 2.30  |
| GO:0000287 | Magnesium ion binding                                             | PRPS2, GEN1, DYRK2, ATP8B2, MAST1, XYLT2, RPS6KA3, GCLC, NT5C1A, RPS6KA2, EXTL3, PI4K2A, CILK1, MAP3K5                                                                                                                                                                                                                                                                                                                                                                                                                                                                                                                                                                                                                                                                                                                                                                                                                                                                                                                                                                                                                               | 2.11 | 0.031 | 1.87  |
| GO:0004712 | Protein serine/threonine/tyrosine kinase activity                 | ALK, NTRK1, ITK, DYRK2, MAST1, TNK1, CAMK2A, TESK1, CSNK1D, MST1R, KSR2, AURKA, GAK, HCK, RPS6KA3, RPS6KB1, TAOK1, RPS6KA2, NEK10, BTK, CILK1, CDKL1,                                                                                                                                                                                                                                                                                                                                                                                                                                                                                                                                                                                                                                                                                                                                                                                                                                                                                                                                                                                | 3.37 | 0.032 | 1.58  |

| ID              | Term                                          | Genes                                                                                                                                                                                                          | Gene ratio | P-value | Fold enrichment |
|-----------------|-----------------------------------------------|----------------------------------------------------------------------------------------------------------------------------------------------------------------------------------------------------------------|------------|---------|-----------------|
| GO:0070573      | Metalloprotease activity                      | MAP3K5, PAK4<br>CPQ, DPEP2, ADAM10                                                                                                                                                                             | 0.42       | 0.036   | 9.65            |
| GO:0004713      | Protein tyrosine kinase activity              | NTRK1, ALK, ITK, HCK, DYRK2, TNK1, BTK, TESK1, MST1R                                                                                                                                                           | 1.26       | 0.040   | 2.33            |
| GO:0004382      | Guanosine-diphosphatase activity              | ENTPD2, ENTPD6, ENTPD7                                                                                                                                                                                         | 0.42       | 0.044   | 8.69            |
| GO:0017111      | Nucleoside-triphosphatase activity            | ENTPD2, ENTPD6, ENTPD7                                                                                                                                                                                         | 0.42       | 0.044   | 8.69            |
| GO:0045134      | Uridine-diphosphatase activity                | ENTPD2, ENTPD6, ENTPD7                                                                                                                                                                                         | 0.42       | 0.044   | 8.69            |
| GO:0017110      | Nucleoside-diphosphatase activity             | ENTPD2, ENTPD6, ENTPD7                                                                                                                                                                                         | 0.42       | 0.044   | 8.69            |
| D, KEGG pathway |                                               |                                                                                                                                                                                                                |            |         |                 |
| hsa04610        | Complement and coagulation cascades           | PROCR, CR1, PROC, SERPINB2, ITGAX, CFHR5, KLKB1, C8A, C2                                                                                                                                                       | 1.26       | 0.010   | 2.97            |
| hsa04310        | Wnt signaling pathway                         | APC2, TCF7L1, FBXW11, SERPINF1, CAMK2A, WNT5A, APCDD1, SENP2, SFRP4, PLCB3, ZNRF3, CCND1, CER1                                                                                                                 | 1.83       | 0.016   | 2.17            |
| hsa05207        | Chemical carcinogenesis - receptor activation | ADCY4, AIP, EPHX3, ADRB2, ESR1, RPS6KA3, FGF8, CYP2B6, CCND1, RPS6KB1, RPS6KA2, UGT1A5, IKBKE, GSTT2B, KPNA3                                                                                                   | 2.11       | 0.017   | 2.01            |
| hsa04020        | Calcium signaling pathway                     | NTRK1, MYLK2, CAMK2A, ATP2A3, ADCY4, TACR3, MST1R, ADRB2, MCOLN1, GRIN2C, PLCB3, FGF8, STIM1, PLCE1, PLCD3, PLCD1                                                                                              | 2.25       | 0.022   | 1.89            |
| hsa05168        | Herpes simplex virus 1 infection              | ZNF23, ZFP82, ZNF3, ZFP30, ZNF429, ZNF528, ZNF649, ZNF569, ZNF546, IKBKE, ZNF100, ZNF680, ZNF181, ZNF10, TAP1, TSC1, TRAF2, HCFC2, ZFP90, ZNF33A, ZNF878, ZNF735, SRSF5, ZNF136, ZNF114, ZNF354C, ZNF674, TLR3 | 3.93       | 0.022   | 1.55            |
| hsa00511        | Other glycan degradation                      | MANBA, MAN2B2, MAN2C1, GBA2                                                                                                                                                                                    | 0.56       | 0.024   | 6.31            |
| hsa04919        | Thyroid hormone signaling pathway             | MED12, MED1, PLCB3, CCND1, MDM2, ATP2A3, PLCE1, PLCD3, ESR1, PLCD1                                                                                                                                             | 1.40       | 0.026   | 2.35            |
| hsa00562        | Inositol phosphate metabolism                 | PLCB3, MTMR3, SYNJ1, PLCE1, PLCD3, PI4K2A, PLCD1                                                                                                                                                               | 0.98       | 0.042   | 2.72            |
| hsa03430        | Mismatch repair                               | RFC5, RFC3, RFC2, MLH3                                                                                                                                                                                         | 0.56       | 0.045   | 4.94            |
| hsa01212        | Fatty acid metabolism                         | HADHB, ACOX1, PPT1, ELOVL7, ACSBG2, HACD2                                                                                                                                                                      | 0.84       | 0.049   | 2.99            |

GO, Gene Ontology; KEGG, Kyoto Encyclopedia of Genes and Genomes; ARID1A, AT-rich interacting domain-containing protein 1A.
